1  
2  
3  
4  
5  
6  
7  
8  
9  
10  
11  
12  
13  
14  
15  
16  
17  
18  
19  
20  
21  
22

**Bud23 promotes the progression of the Small Subunit Processome to the pre-40S ribosome in *Saccharomyces cerevisiae***

Joshua J. Black<sup>1</sup>, Richa Sardana<sup>1,†</sup>, Ezzeddine W. Elmir<sup>1</sup>, Arlen W. Johnson<sup>1,\*</sup>

<sup>1</sup> Department of Molecular Biosciences, The University of Texas at Austin, Austin, Texas, United States of America

<sup>†</sup> Current Address: Department of Molecular Biology and Genetics, Weill Institute for Cell and Molecular Biology, Cornell University, Ithaca, NY

Running tittle: The role of Bud23 in 40S maturation.

\*Corresponding author

Email: [arlen@austin.utexas.edu](mailto:arlen@austin.utexas.edu) (AWJ)

## 23 **Abstract**

24           The Small Subunit Processome is a metastable complex that is thought to represent an  
25 early checkpoint in the ribosomal small subunit (SSU) assembly pathway. Progression of the SSU  
26 Processome towards a mature state involves dynamic rearrangements of RNAs and proteins, but  
27 what drives this progression is not known. Previous studies have suggested that the  
28 methyltransferase Bud23 acts during SSU Processome progression. Here, we carried out a  
29 comprehensive genetic screen that identified bypass suppressors of *bud23Δ* and link Bud23 to a  
30 network of physical interactions that stabilize the SSU Processome. Moreover, two of these  
31 factors, the RNA helicase Dhr1 and the EF-Tu-like GTPase Bms1, are thought to facilitate crucial  
32 structural rearrangements. We propose a model in which Bud23 binding to the 3'-domain  
33 promotes the release of factors surrounding its binding site to drive rearrangements during the  
34 progression of the SSU Processome.

35

## 36 **Introduction**

37           Ribosomes are the molecular machines responsible for translation of the genetic code.  
38 They are produced by an energetically expensive and dynamic assembly pathway requiring more  
39 than 200 biogenesis factors in eukaryotic cells (reviewed in (Baßler and Hurt, 2019; Klinge and  
40 Woolford, 2019; Sloan et al., 2016; Tomecki et al., 2017)). In *Saccharomyces cerevisiae*, the large  
41 subunit (LSU, 60S) contains three rRNAs (25S, 5.8S and 5S) and 46 ribosomal proteins (r-proteins),  
42 whereas the small subunit (SSU, 40S) has the 18S rRNA and 33 r-proteins (Ben-Shem et al., 2011).  
43 Ribosome assembly begins in the nucleolus with the synthesis of the primary rRNA transcript

44 (35S in yeast). Co-transcriptional folding of the rRNA is promoted by the recruitment of early  
45 ribosomal proteins and biogenesis factors that also process the rRNA. The primary transcript  
46 contains the 18S, 5.8S, and 25S rRNAs and four spacer regions that are removed during ribosome  
47 assembly: two external transcribed spacers (ETS) and two internal transcribed spacers (ITS) (Fig.  
48 S1). Because the 18S rRNA is encoded in the 5'-portion of the primary transcript, which is  
49 transcribed first, the initial folding of the pre-rRNA transcript is dedicated to small subunit  
50 assembly. Endonucleolytic cleavage within ITS1 separates the SSU precursor from the LSU  
51 precursor allowing the subunits to follow independent paths as they undergo further maturation  
52 and nuclear export.

53         The recruitment of biogenesis factors follows a hierarchical order reliant on the formation  
54 of secondary, tertiary, and quaternary structure of the pre-ribosomes (Chaker-Margot et al.,  
55 2015; Chen et al., 2017; Cheng et al., 2019; Hunziker et al., 2019; Zhang et al., 2016). Nucleolar  
56 assembly events of the SSU culminate in completion of the SSU Processome (sometimes referred  
57 to as a 90S pre-ribosome), a metastable 6 MDa-sized particle containing the 5' ETS, nascent 18S  
58 rRNA, 15 r-proteins, and about 50 biogenesis factors (reviewed in (Barandun et al., 2018; Chaker-  
59 Margot, 2018)). During its assembly, the 5', central, 3' major, and 3' minor domains of the 18S  
60 rRNA (Fig. S2) fold largely independently (Barandun et al., 2017; Cheng et al., 2019, 2017;  
61 Hunziker et al., 2019; Sun et al., 2017). In the assembled SSU Processome, these RNA domains  
62 are scaffolded by a multitude of biogenesis factors, the 5' ETS ribonucleoprotein complex (RNP),  
63 and U3 snoRNA that prevent their early collapse into the more densely packed structure of the  
64 subsequent pre-40S and mature 40S particles. The transition of the SSU Processome to the pre-  
65 40S requires several endonucleolytic cleavages of rRNA, release of the 5' ETS RNP and U3, most

66 of the SSU Processome factors, and large architectural rearrangements. These events likely  
67 coincide with release of the pre-40S into the nucleoplasm. Although recent structural and  
68 molecular analysis of the SSU Processome and assembly intermediates have brought assembly  
69 of the SSU Processome into focus, there is a dearth of understanding about the events and  
70 mechanisms driving the transition of the SSU Processome into a pre-40S particle.

71 Early recruitment of the U3 snoRNA is crucial for the formation and function of the SSU  
72 Processome (Dragon et al., 2002; Hunziker et al., 2016; Zhang et al., 2016). Structural analyses of  
73 the SSU Processome show that the box C/D U3 snoRNA threads into the core of the complex  
74 where it spatially separates the rRNA domains and scaffolds biogenesis factors (Barandun et al.,  
75 2017; Cheng et al., 2017). Two regions of U3, referred to as the 5' and 3' hinges, hybridize to the  
76 5' ETS RNA while its Box A' and Box A regions hybridize to the pre-18S rRNA, henceforth U3-18S  
77 heteroduplexes. Notably, Box A hybridizes with the extreme 5'-end of 18S, precluding formation  
78 of helix 1 and the Central Pseudoknot (CPK) of the mature 40S particle (Barandun et al., 2017;  
79 Sun et al., 2017). The CPK is a universally conserved feature of the SSU formed by long-range,  
80 non-canonical base-pairing between helices 1 and 2 that allows the four rRNA domains to  
81 compact onto one another (Fig. S2), and generates the environment necessary to establish the  
82 decoding center (Ben-Shem et al., 2011; Noeske et al., 2015). Because U3 blocks CPK formation,  
83 the release of U3 is a critical, irreversible step in the maturation of the SSU (Chaker-Margot, 2018;  
84 Kressler et al., 2017). The unwinding of U3 is catalyzed by the DEAH/RHA helicase Dhr1 (Sardana  
85 et al., 2015) which is activated by the SSU Processome factor Utp14 (Boneberg et al., 2019;  
86 Roychowdhury et al., 2019; Zhu et al., 2016). Mutational analysis identified a short loop of Utp14  
87 that is necessary and sufficient for the activation of Dhr1 *in vitro* (Boneberg et al., 2019; Zhu et

88 al., 2016), and deletion of this loop phenocopies a catalytic *dhr1* mutant *in vivo* (Zhu et al., 2016).  
89 How Utp14 times the activation of Dhr1 remains unknown, and neither Dhr1 nor the activation  
90 loop of Utp14 have been resolved in SSU Processome structures (Barandun et al., 2017; Cheng et  
91 al., 2017). RNA crosslinking and structural analysis indicate that Utp14 binds simultaneously to  
92 the 5' ETS RNA, the 5'-, Central, and 3'-ends of the pre-18S rRNA, and to U3, suggesting that  
93 Utp14 is uniquely positioned to time Dhr1 activation by monitoring completion of transcription  
94 of the small subunit RNA (Barandun et al., 2017; Black et al., 2018; Cheng et al., 2017).

95         Endonucleolytic cleavages within the rRNA are critical for 40S assembly and conceivably  
96 could provide the irreversible step that initiates the transition of the SSU Processome to pre-40S.  
97 The current SSU Processome structures all contain rRNA cleaved at A0 but not at A1, indicating  
98 that A0 cleavage alone is not sufficient to trigger progression from the SSU Processome  
99 (Barandun et al., 2017; Cheng et al., 2019, 2017; Sun et al., 2017). Around the time of Dhr1  
100 function, cleavages at sites A1 within 5' ETS and the site A2 within ITS1 occur (Colley et al., 2000;  
101 Sardana et al., 2015). It is possible that cleavage at A1 sets the transition in motion. Site A1 is  
102 cleaved by Utp24 which is positioned in the vicinity of site A1. It has been proposed that the  
103 essential GTPase Bms1 acts as a molecular switch to drive structural rearrangements needed for  
104 Utp24 to access its substrate (Cheng et al., 2017; Wells et al., 2016), but what signals Bms1  
105 activation is not known. Subsequent cleavage at A2 separates the SSU precursor from the LSU  
106 precursor. When cleavage at site A2 is inhibited, cleavage at the downstream site A3 can be used  
107 instead.

108         Bud23 is a Trm112-dependent methyltransferase that modifies guanosine 1575 (G1575)  
109 within the 3' major domain of 18S rRNA (Létoquart et al., 2014; Sardana and Johnson, 2012;

110 White et al., 2008). *BUD23* is a nonessential gene in yeast, but its deletion (*bud23Δ*) causes a  
111 significant growth defect that correlates with an approximate 70% reduction of 40S subunits  
112 (White et al., 2008). Catalytically inactive *bud23* mutants fully complement the growth defect of  
113 *bud23Δ* cells suggesting that the presence of the protein but not its methyltransferase activity is  
114 needed for ribosome assembly (Létoquart et al., 2014; White et al., 2008). Bud23 is not typically  
115 annotated as an SSU Processome factor and is not present in the SSU Processome structures.  
116 However, Bud23 sediments at the positions of both 90S and 40S in sucrose density gradients and  
117 *bud23Δ* cells are defective in A2 site cleavage (Sardana et al., 2013), suggesting a role for Bud23  
118 prior to A2 cleavage. In addition, deletion of *BUD23* shows negative genetic interactions with  
119 factors that cleave at A3 (Sardana et al., 2013) and is suppressed by extragenic mutations in the  
120 SSU Processome factors *DHR1*, *UTP14*, *UTP2 (NOP14)*, and *IMP4* (Sardana, 2013; Sardana et al.,  
121 2014, 2013; Zhu et al., 2016). These results imply that Bud23 enters the 40S biogenesis pathway  
122 prior to SSU Processome transition to pre-40S and remains associated with early pre-40S  
123 particles. Consistent with these observations, the human ortholog of Bud23, WBSCR22, was  
124 recently resolved in a cryo-EM structure of an early human pre-40S particle (Ameismeier et al.,  
125 2018). Despite the evidence that Bud23 enters the 40S biogenesis pathway at a point prior to A2  
126 cleavage and before complete disassembly of the SSU Processome, its specific function in the  
127 transition of the SSU Processome to pre-40S was not known.

128         Here, we have carried out a comprehensive genetic analysis of extragenic suppressor  
129 mutations of *bud23Δ* and identified a genetic and physical interaction network that connects  
130 Bud23 to the disassembly of the SSU Processome. We found novel extragenic mutations in *IMP4*,  
131 *RPS28A*, *UTP2*, *UTP14*, *DHR1*, and *BMS1* that acted as bypass suppressors of *bud23Δ*. Recent SSU

132 Processome structures provide the context to rationalize how these bypass suppressors disrupt  
133 SSU Processome structure and imply a role for Bud23 in SSU Processome disassembly. This  
134 revealed a network of genetic and physical connections that are tied to Bud23 function. Bms1,  
135 Imp4, and Utp2 all interact with the 3' basal subdomain and have helical extensions that embrace  
136 the U3-18S substrate of Dhr1. We found that many of the mutations destabilized protein-protein  
137 or protein-RNA interactions connecting the 3' major domain to the U3-18S heteroduplexes.  
138 Finally, mass spectrometric and Northern blot analysis of particles isolated in the absence of  
139 Bud23 revealed an enrichment of late SSU Processome factors and rRNA species not yet cleaved  
140 at sites A1 and A2. Together, our data implies that Bud23 binding induces the disassembly of SSU  
141 Processome factors connecting the 3' basal subdomain to the U3-18S duplexes. In turn, this  
142 promotes Bms1 and Dhr1 activation to drive SSU Processome progression.

143

## 144 **Results**

145 **Extragenic suppressors of *bud23Δ* map to SSU Processome factors and connect Bud23 to the**  
146 **U3 snoRNA.** Bud23 methylates G1575 in the 3' basal subdomain of the 18S rRNA (Létoquart et  
147 al., 2014; White et al., 2008), a region comprised of helices 28, 29, 30 41, 41es10, 42, and 43 (Figs.  
148 1A, 1B, & S2) (Sun et al., 2017). The deletion of *BUD23* severely impairs 40S production and cell  
149 growth, yet a catalytically inactive Bud23 fully complements *bud23Δ* (Létoquart et al., 2014;  
150 White et al., 2008), suggesting that 40S assembly requires Bud23 binding but not rRNA  
151 methylation. The slow growth defect of *bud23Δ* places strong selective pressure on cells for  
152 extragenic bypass suppressors. Our lab previously reported suppressing mutations in *DHR1*,  
153 *UTP14*, and *UTP2*, all coding for late acting SSU Processome factors (Sardana et al., 2014, 2013;

154 Zhu et al., 2016). We also found mutations in *IMP4* encoding an early SSU Processome factor  
155 (Sardana, 2013). These results connected Bud23 to the late events of the SSU Processome, but  
156 they did not allow us to rationalize a mechanism for Bud23 function. The complete SSU  
157 Processome harbors nearly 70 ribosomal proteins and biogenesis factors, and we postulated that  
158 mapping the mutations to current high-resolution structures of the SSU Processome would help  
159 illuminate the function of Bud23. To expand the coverage, we screened for additional  
160 spontaneous suppressors by continuously passaging cultures of *bud23Δ* until they arose. We then  
161 amplified and sequenced the *IMP4*, *DHR1*, *UTP14*, and *UTP2* loci from these suppressed strains,  
162 and identified additional mutations in these genes. Suppressed strains that did not contain  
163 mutations in these genes were subjected to whole-genome sequencing and genome variant  
164 analysis. This revealed novel suppressing mutations in *RPS28A*, a ribosomal protein that binds  
165 the 3' basal subdomain, and *BMS1*, an essential GTPase of the SSU Processome. Mutations in  
166 *RPS28A* and *BMS1* were confirmed by Sanger sequencing and verified as suppressors of *bud23Δ*  
167 after reintroducing the mutations into *bud23Δ* cells (data not shown).

168       Portions of Bms1, Imp4, Rps28, Utp2, and Utp14, but not Dhr1, have been resolved in  
169 structures of the SSU Processome (Barandun et al., 2017; Cheng et al., 2017; Sun et al., 2017).  
170 Remarkably, Bms1, Imp4, Rps28, and Utp2 all interact directly with the 3' basal subdomain  
171 containing the Bud23 binding site (Fig. 1C). These factors appear to contribute to the structural  
172 stability of the SSU Processome and form multiple protein-protein and protein-RNA contacts (Fig.  
173 1D). Additionally, Bms1, Imp4, and Utp2 each contain extended alpha-helices that penetrate into  
174 the core of the SSU Processome where they embrace the U3 Box A and Box A'-18S duplexes (Fig.  
175 1D). Although Dhr1 is not resolved in any of the SSU Processome structures published to date,



176 we previously mapped its binding site on U3 to the 5'-hinge and Box A, immediately upstream of  
177 and overlapping the Box A and Box A'-18S duplexes that we identified as the substrate for Dhr1  
178 unwinding (Fig. S3A) (Sardana et al., 2015). Only a few segments of Utp14 are resolved in current  
179 SSU Processome structures, but Utp14 can be seen binding to pre-rRNA and U3 snoRNA  
180 immediately upstream of the duplexes Dhr1 unwinds (Fig. S3A) (Barandun et al., 2017; Black et  
181 al., 2018). Intriguingly, Utp14 and the factors positioned at the 3' basal subdomain bookend the  
182 U3-18S heteroduplexes. Thus, Imp4, Utp2, and Bms1 provide a physical linkage between the 3'  
183 basal subdomain and the U3-18S heteroduplexes that are unwound by Dhr1.

184 We identified five novel mutations in *BMS1* and one in *RPS28A* as spontaneous  
185 suppressors of *bud23Δ* (Fig. 1E). We also found an additional 15 mutations in *DHR1*, 13 mutations  
186 in *IMP4*, two mutations in *UTP14*, and one mutation in *UTP2* that were not isolated in our  
187 previous studies. Five additional mutations were identified in *UTP2* using error-prone PCR  
188 mutagenesis (discussed below). These observations revealed a network of SSU Processome  
189 factors that genetically interact with Bud23 and make multiple physical contacts amongst one  
190 another (Fig. 1F). Importantly, this interaction network physically connects the 3' basal  
191 subdomain with the U3-18S heteroduplex substrates of Dhr1, suggesting a functional linkage  
192 between these two sites. Many of the mutations that we report here and previously (Zhu et al.,  
193 2016) are in protein-RNA or protein-protein interfaces where they would appear to weaken  
194 interactions within the SSU Processome. Because these mutations bypass the absence of Bud23,  
195 we propose that Bud23 binding to the 3' basal subdomain induces the release of factors from  
196 this region to promote progression of the SSU Processome to a pre-40S particle. In the following

197 sections, we consider how the *bud23Δ* bypass suppressor mutations affect the dynamics of the  
198 particle.

199

200 **The Imp4 and Rps28A mutations mainly cluster around their interfaces with the 3' basal**  
201 **subdomain.** We identified 21 unique mutations in *IMP4* and a single mutation within *RPS28A*  
202 that suppressed *bud23Δ* (Fig. 1E). All of these mutations partially restored growth in a *bud23Δ*  
203 mutant (Fig. 2A), although the *rps28A-G24D* mutation did not suppress as well as the *imp4*  
204 mutations, perhaps because expression of the wild-type paralog *RPS28B* partially masked its  
205 suppression phenotype. Imp4 is a component of the heterotrimeric Mpp10-Imp3-Imp4 sub-  
206 complex (Lee and Baserga, 1999) which enters the SSU Processome at an early stage of its  
207 assembly, during transcription of the 5' ETS (Chaker-Margot et al., 2015; Zhang et al., 2016). The  
208 Mpp10 complex may serve as an initial binding platform for several additional SSU Processome  
209 factors (Sá-Moura et al., 2017). Recent structures show that Imp4 is positioned in the core of the  
210 SSU Processome where its N-terminal domain (NTD) contacts the U3-18S heteroduplexes while  
211 its RNA-binding Brix domain is cradled in the concave RNA fold of the 3' basal subdomain (Fig.  
212 2B) (Barandun et al., 2017; Cheng et al., 2017; Sun et al., 2017). On the other hand, the ribosomal  
213 protein Rps28 binds to the opposite, convex surface of the 3' basal subdomain (Fig. 2B), adjacent  
214 to but not occluding the Bud23 binding site (Fig. 2B; marked by G1575) (Ameismeier et al., 2018).

215 The mutations in Imp4 primarily mapped to two regions of the protein (Fig. 2C). Most of  
216 the mutations were in the Brix domain of Imp4 at its interface with the 3' basal subdomain RNA,  
217 henceforth “rRNA interaction” mutations (Fig. 2C). These included mutations of residues S93,  
218 R94, S101, R116, N118, N121, and R146 which are all expected to form hydrogen bonds with the

219 rRNA (Barandun et al., 2017; Cheng et al., 2017). These mutations likely weaken the affinity of  
220 the protein for the rRNA. The single Rps28-G24D mutation maps to its rRNA interface with the 3'  
221 basal subdomain. Unlike Imp4, Rps28 is an integral component of the small subunit and remains  
222 associated with the mature ribosome. Consequently, it is unlikely that the glycine to aspartate  
223 substitution promotes release of Rps28. More likely, this mutation may increase the flexibility of  
224 the RNA to facilitate release of Imp4 (Fig. 2C). Five of the mutations in Imp4, in residues D74, Y77,  
225 H156, H159 and H208, mapped to an intramolecular domain interface between the core of the  
226 protein and the NTD that interacts with the U3 Box A'-18S duplex, henceforth "NTD interaction"  
227 mutations (Fig. 2D). The NTD interaction mutations may alter the flexibility of the NTD, thereby  
228 destabilizing its interaction with the U3 Box A'-18S duplex. The observation that *imp4* mutations  
229 that suppress *bud23Δ* are predicted to weaken the affinity of Imp4 for the 3' basal subdomain,  
230 suggests that Bud23 binding to the 3' basal subdomain leads to disruption of the protein-RNA  
231 interactions in this region.

232 Bud23 is needed for efficient processing at the A2 cleavage site (White et al., 2008). To  
233 ask if the suppressing mutations in *IMP4* and *RPS28A* bypass this rRNA processing defect in  
234 *bud23Δ* cells, we prepared total RNA from actively dividing wild-type (WT) cells or *bud23Δ* cells  
235 with or without a suppressing mutation in *IMP4* or *RPS28A* and probed for rRNA processing  
236 intermediates by Northern blotting (Fig. 2E). As we reported previously (Sardana et al., 2013),  
237 *bud23Δ* cells showed a loss of the 27SA2 rRNA intermediate, indicating loss of A2 cleavage, and  
238 reduced levels of 18S rRNA compared to WT cells, but no concurrent accumulation of 23S rRNAs.  
239 Suppression of *bud23Δ* by the *imp4* and *rps28A* mutants partially restored levels of the 27SA2  
240 rRNA intermediate and 18S rRNA indicating a restoration of cleavage at site A2 and 40S

241 biogenesis. Surprisingly, *bud23Δ* cells also slightly accumulated the 22/21S intermediates (Fig.  
242 2E). 22S represents rRNA cleaved at sites A0 and A3 but not A1 or A2 while 21S represents rRNA  
243 cleaved at sites A1 and A3 but not A2. (Fig. S1). Although the A2-A3 probe cannot distinguish  
244 between the 22S and 21S intermediates the A0-A1 probe gave a similar hybridization signal  
245 indicating that the 22S rRNA is responsible for some of this signal (Fig. 2E). Suppression of *bud23Δ*  
246 partially alleviated the accumulation of this species. This was most evident in the strains  
247 harboring the *imp4* mutants S93T, R94S, N121I, and H159R. These data indicate that Bud23  
248 affects not only A2 processing, as we previously reported (White et al., 2008), but also cleavage  
249 at A1.

250 As a complementary approach to ask if *bud23Δ* suppressors restored 40S biogenesis, we  
251 analyzed ribosomal subunit levels on sucrose density gradients after separating free ribosomal  
252 subunits, 80S, and polysomes from wild-type cells and *bud23Δ* cells with or without a suppressing  
253 mutation. In wild-type cells, there was an appreciable steady-state level of free 40S and 60S  
254 subunits (Fig. 2F). In contrast, in *bud23Δ* cells in which 40S production is limited, the free 40S  
255 peak disappeared and the amount of free 60S was dramatically increased, at the expense of 80S  
256 (Fig. 2C). The introduction of suppressing mutations in *imp4* or *rps28a* partially restored the levels  
257 80S and free 40S, similar to the suppression of *bud23Δ* by mutations in *utp14* or *utp2* that we  
258 reported previously (Sardana et al., 2013). Taken together, the Northern blotting and sucrose  
259 density gradient data indicate that *imp4* and *rps28A* mutants partially alleviate the 40S biogenesis  
260 defects of *bud23Δ* cells.

261

262 **Utp2 mutants that suppress *bud23Δ* destabilize Utp2 interaction with Imp4.** Our lab previously  
263 identified *utp2-A2D* as a spontaneous and dominant suppressor of *bud23Δ* that partially restores  
264 40S biogenesis and A2 processing of the primary rRNA transcript (Sardana et al., 2013). From our  
265 screen for additional spontaneous suppressors of *bud23Δ*, we found an additional Utp2  
266 mutation, *utp2-L9S*, that suppressed *bud23Δ* (Fig. 3A). Utp2, also known as Nop14, assembles  
267 into the SSU Processome with its binding partners Emg1, Noc4, and Utp14 (Baßler et al., 2016;  
268 Liu and Thiele, 2001; Vincent et al., 2018), once the 3' minor domain is fully transcribed (Chaker-  
269 Margot et al., 2015; Zhang et al., 2016). The association of human Utp2 with human pre-40S  
270 complexes indicates that Utp2 remains on nascent particles during the transition from the SSU  
271 Processome to pre-40S (Ameismeier et al., 2018) suggesting that it has an active role in particle  
272 progression.

273 To gain further insight into the mechanism by which mutations in *UTP2* suppress *bud23Δ*,  
274 we performed random PCR mutagenesis of *UTP2* and identified six additional mutations in *UTP2*  
275 that suppressed *bud23Δ* to different degrees (Fig. 3B; left panel). In this screen we also reisolated  
276 the previously identified *utp2-A2D* mutation. All mutants fully complemented loss of Utp2 (Fig.  
277 3B; right panel). The suppressing mutations all mapped to the N-terminal domain of Utp2. Four  
278 of the mutations clustered around the extreme N-terminus of Utp2 and another three clustered  
279 around residues 148-151. In an attempt to generate mutants with stronger phenotypes than the  
280 individual mutants, we generated the combinatorial mutants *utp2-DPE* containing the mutations  
281 A2D, L6P, and K7E, and *utp2-SSH* harboring the mutations L148S, F149S, and L151H. Both of the  
282 combinatorial mutants retained the ability to suppress *bud23Δ* and fully complemented loss of  
283 *UTP2*, but *utp2-SSH* was a stronger suppressor than *utp2-DPE* (Fig. 3B).

284           Based on recent partial structures of Utp2 within the SSU Processome (Barandun et al.,  
285   2017; Cheng et al., 2017) the globular domain of Utp2 directly contacts the Emg1 heterodimer,  
286   Enp1, and Noc4 within a region of the 3' major domain that will make up the beak of the mature  
287   SSU, while its extended N- and C-terminal arms pierce deep into the core of the SSU Processome.  
288   The C-terminal arm of Utp2 contacts the U3 Box A'-18S duplex while its NTD contacts the Brix  
289   domain of Imp4 (Figs. 1D & 3C). Notably, the suppressor mutations we identified in Utp2 are  
290   within its NTD. Four of the residues (L6, K7, L9 and F58) mutated in our screen were resolved in  
291   current structures of the SSU Processome (Fig. 3C). Residues L6, K7, and L9 are within a small  
292   helix on the extreme N-terminus of Utp2 that interacts with Imp4, while K7 appears to contact  
293   the phosphate backbone of C1623 of the 3' basal subdomain. Meanwhile, F58 of Utp2 makes an  
294   additional nearby contact between these proteins. These observations prompted us to speculate  
295   that the *utp2* suppressors of *bud23Δ* perturb the interaction between Utp2 and Imp4. Previous  
296   large-scale yeast-two hybrid (Y2H) studies did not report an interaction between Utp2 and Imp4  
297   (Baßler et al., 2016; Vincent et al., 2018). However, those studies used Utp2 constructs harboring  
298   N-terminal fusions of GAL4 activating or DNA binding domain (AD and BD, respectively). Because  
299   the apparent interaction between Utp2 and Imp4 requires the extreme N-terminus of Utp2 (Fig.  
300   3C), such a fusion protein could sterically hinder their interaction. To this end, we cloned a Utp2  
301   Y2H construct harboring an HA-tagged GAL4 activating domain fused to its C-terminus (Utp2-AD-  
302   HA), which allowed us to detect an interaction between Utp2-AD-HA and BD-myc-Imp4 (Fig. 3D;  
303   left panel). Using this system, we assayed the Utp2-DPE, Utp2-F58S, and Utp2-SSH mutants for  
304   their ability to interact with Imp4. All of the mutants showed decreased interaction with Imp4  
305   with the Utp2-F58S and Utp2-SSH mutants being the most severe. All the mutant Utp2 proteins

306 were expressed to similar levels indicating that the reduced interaction was not due to  
307 differences in expression or degradation of the mutant proteins (Fig. 3D; right panel). The results  
308 from the analysis of Utp2-DPE and Utp2-F58S are consistent with the notion that the mutations  
309 in Utp2 that suppress *bud23Δ* disrupt the interaction between Utp2 and Imp4. The result of Utp2-  
310 SSH losing interaction with BD-Imp4 suggests that the flexible, unresolved region of Utp2  
311 between R116 and P201 interacts with Imp4, but we cannot rule out the formal possibility that  
312 these mutations suppress *bud23Δ* by some other unknown means.

313 F58 of Utp2 fits into a hydrophobic pocket of Imp4 (Fig. 3E; upper panel). Interestingly,  
314 two mutations in *IMP4*, V170F and P252L, that suppressed *bud23Δ* (Figs. 2A & 2B) map to  
315 residues that line this pocket (Fig. 3E; lower panel). The positions of these two mutations predict  
316 that they could also disrupt the interaction between Imp4 and Utp2. To test this possibility, we  
317 introduced the V170F and P252L mutations into the BD-myc-Imp4 vector and assayed for their  
318 interaction with Utp2-AD-HA. Indeed, mutation of either of these residues caused a loss of  
319 interaction between Utp2 and Imp4 (Fig. 3F; upper panel), and the loss of interaction could not  
320 be explained by reduced protein expression of the mutant Imp4 constructs (Fig. 3F; lower panel).  
321 These results, together with the Y2H assays using mutant Utp2 strongly suggest that disrupting  
322 the interaction between Imp4 and Utp2 bypasses the 40S assembly defect in the absence of  
323 Bud23.

324

325 **Bms1 mutants that suppress *bud23Δ* are poised to affect the conformational state of Bms1.** We  
326 found five *bud23Δ*-suppressing mutations within *BMS1* (Figs. 1F & 4A). Like the mutations in  
327 *DHR1*, *UTP14*, *UTP2*, *IMP4*, and *RPS28A* (Fig. 2E) (Sardana et al., 2014, 2013; Zhu et al., 2016),

328 mutant *bms1* alleles partially alleviated the rRNA processing defects and restored 40S biogenesis  
329 (Figs. 4B & 4C) suggesting that these mutations overcome the same biogenesis defect in the  
330 absence of Bud23 that the other *bud23Δ* suppressors do. *BMS1* encodes a 136 kDa GTPase that  
331 is essential for 40S biogenesis (Gelperin et al., 2001; Wegierski et al., 2001). Bms1 forms a  
332 subcomplex with Rcl1 (Delprato et al., 2014; Gelperin et al., 2001; Karbstein et al., 2005; Karbstein  
333 and Doudna, 2006) prior to its entry into the SSU Processome after completion of the 3' minor  
334 domain (Chaker-Margot et al., 2015; Zhang et al., 2016). The GTPase activity of Bms1 has been  
335 confirmed *in vitro* (Karbstein et al., 2005; Karbstein and Doudna, 2006), and its ability to bind GTP  
336 is essential (Delprato et al., 2014) suggesting that it is a functional GTPase *in vivo*. However, the  
337 specific role of Bms1 within the SSU Processome has not been well explored. GTPases often serve  
338 as molecular switches that undergo conformational changes (reviewed in (Wittinghofer and  
339 Vetter, 2011)). Due to its position in the SSU Processome, it has been suggested that Bms1 helps  
340 remodel the SSU Processome core so the endonuclease Utp24 can access and cleave the A1-site  
341 (Cheng et al., 2017). Thus, this model predicts that Bms1 has a role in the progression of the SSU  
342 Processome to the pre-40S.

343 More than half of Bms1 has been resolved in structures of the SSU Processome and can be  
344 divided into five major domains and two small regions that bind its partner Rcl1 and the  
345 acetyltransferase Kre33 (Fig. 4D) (Barandun et al., 2017; Cheng et al., 2017; Sun et al., 2017).  
346 Domain I contains the GTPase catalytic site and, together with the beta-barrels of domains II and  
347 III, forms a globular body. Domain IV protrudes from this globular body to interact with the 3'  
348 basal subdomain RNA and contacts the CTDs of Imp4 and Utp2 (Fig. 4E). Finally, the C-terminal  
349 domain V begins as an extended strand that lays on domain III before becoming an extended



350 alpha-helix that inserts between the U3 Box A'-18S and U3 Box A-18S heteroduplexes (Fig. 4D).  
351 Although the five mutations that suppressed *bud23Δ* map to domains I, II, III and V (Fig. 4D; upper  
352 panel) , in 3D structure the mutated residues D124, D843, A903, and S1020 lie immediately under  
353 the unstructured strand connecting domain IV to the extended C-terminus (Fig. 4F). Thus, four of  
354 the five suppressing mutations likely promote the flexibility of this connecting loop. G813 is  
355 located in the connector between Domains II and III where it could alter the relative positioning  
356 of these two domains and influence how domain III interacts with the unstructured strand of  
357 domain V.

358 Bms1 is structurally related to the translation elongation factor EF-Tu which delivers amino-  
359 acyl tRNAs to the ribosome (Fig. S4A) (Wegierski et al., 2001). Comparison of the Bms1 structure  
360 from the SSU Processome to the crystal structures of EF-Tu bound to GDP or the non-  
361 hydrolysable GTP analog, GDPNP, suggests that Bms1 is in the GTP-bound state in the SSU  
362 Processome structures and allows us to speculate how Bms1 functions. The beta-barrels of  
363 domains II and III of Bms1 are conserved in EF-Tu (Fig. S4B). In the GTP-bound state, the beta-  
364 barrels of EF-Tu are positioned to accommodate tRNA binding (Fig. S4C) (Nissen et al., 1999). In  
365 GDP-bound EF-Tu the beta-barrels are rotated to promote tRNA release (Figs. S4C & S4D) (Song  
366 et al., 1999). Interestingly, the comparison of the EF-Tu and Bms1 structures revealed that the  
367 space occupied by tRNA in EF-Tu (Fig. S4E) is occupied by an N-terminal helix of Mpp10 and the  
368 unstructured strand of Bms1 that connects domain IV to the extended C-terminus that interacts  
369 with U3 (Fig. S4F). This observation suggests that the GTP hydrolysis-induced conformational  
370 changes of Bms1 could facilitate undocking of the unstructured strand of Bms1 and Mpp10 from  
371 the conserved core of Bms1. Notably, four of the five mutations in *BMS1* that suppressed *bud23Δ*

372 were either within or contact this strand of Bms1 (Fig. S4F). We suggest that these mutations  
373 facilitate release of this strand and, perhaps, Mpp10 from Bms1.

374

375 **Disruption of Dhr1 and Utp14 interaction suppresses *bud23Δ*.** Our lab previously reported 10  
376 mutations in *DHR1* that suppress *bud23Δ* (Sardana et al., 2014). Here, we isolated an additional  
377 15 suppressing mutations within *DHR1* (Figs. 1F & 5A). Dhr1 is the DEAH-box RNA helicase  
378 responsible for unwinding the U3 snoRNA from the SSU Processome (Colley et al., 2000; Sardana  
379 et al., 2015). The protein harbors a conserved helicase core containing two RecA domains, a  
380 Winged-helix (WH) domain, a Helical Bundle (HB) domain, and an OB-fold domain (Fig. 5A). Dhr1  
381 also contains an N-terminal domain (NTD) that interacts with Bud23 (Létoquart et al., 2014;  
382 Sardana et al., 2014) and a unique C-terminal domain (CTD) that enhances its interaction with its  
383 activator Utp14 (Boneberg et al., 2019; Roychowdhury et al., 2019; Zhu et al., 2016). Although  
384 Dhr1 has yet to be resolved in SSU Processome structures, recent crystal structures of  
385 recombinant yeast Dhr1 (Roychowdhury et al., 2019) and its murine homolog DHX37 (Boneberg  
386 et al., 2019) lacking the NTD allow us to map most of the mutated residues to structure (Fig. 5B).  
387 Consistent with our previous report (Sardana et al., 2014), the overwhelming majority of the  
388 mutations map to residues on the surface of the RecA1 and RecA2 domains (Fig. 5C). We  
389 previously reported that Utp14, the cofactor of Dhr1, binds the RecA1/2 domains (Zhu et al.,  
390 2016). Based on this, we hypothesized that the mutations within the RecA1/2 domains could  
391 affect its interaction with Utp14. To this end, we again turned to yeast 2-hybrid analysis between  
392 BD-myc-Dhr1 and AD-HA-Utp14. We cloned three constructs that combined several mutations  
393 within or proximal to the RecA1 domain (E360K, E397D, E402G, D408Y), within the RecA2 domain

394 (H593Y, R596C, E831K), or in both the RecA1 and RecA2 domains (R563M, D566Y, E831K, F837L)  
395 in the Y2H Dhr1 construct and tested them for the ability to interact with Utp14. All three mutants  
396 showed a significant loss of interaction with Utp14 (Fig. 5D; left). All three of the mutant proteins  
397 expressed similarly (Fig. 5D; right), indicating that the loss-of-interaction was not due to  
398 differential expression. Thus, we conclude that mutations within the RecA1 and RecA2 of Dhr1  
399 that bypass *bud23Δ* do so by weakening its interaction with Utp14.

400 Utp14 stimulates the unwinding activity of Dhr1 (Boneberg et al., 2019; Choudhury et al.,  
401 2018; Zhu et al., 2016). We previously reported five mutations within Utp14 that suppress the  
402 growth defect of *bud23Δ* (Zhu et al., 2016). Notably, these mutations were within a region of  
403 Utp14 spanning residues 719 to 780 that interacts with Dhr1, and extensive mutation or deletion  
404 of this region reduced Utp14 interaction with Dhr1, Utp14-dependent activation of Dhr1 activity  
405 *in vitro* and phenocopied catalytically null Dhr1 *in vivo* (Zhu et al., 2016). Here, we report two  
406 additional mutations in Utp14, W791L and W794L, that suppressed *bud23Δ* (Fig. S3B). These  
407 mutations are slightly downstream of those previously identified and affect two highly conserved  
408 tryptophan residues in a motif weakly reminiscent of a G patch, a motif common to activators of  
409 DEAH/RHA RNA helicases (Zhu et al., 2016). Unfortunately, these residues are not resolved in the  
410 SSU Processome structures, but we suspect that these mutations also weaken the interaction  
411 between Utp14 and Dhr1. How mutations that weaken the interaction Utp14-Dhr1 interaction  
412 promote progression of the SSU Processome in the absence of Bud23 is intriguing considering  
413 that Utp14 activates Dhr1 (Boneberg et al., 2019; Zhu et al., 2016). These results suggest that the  
414 nature of Utp14-Dhr1 interaction is more complex than originally thought and will require  
415 additional work to understand.

416

417 **Bud23 depletion partially inhibits SSU Processome progression.** The above genetic results  
418 suggest that disrupting protein-protein and protein-RNA interactions in the 3' basal subdomain  
419 of the SSU Processome can partially bypass the absence of Bud23. We interpret these results to  
420 indicate that Bud23 binding leads to disassembly events that promote the progression of the SSU  
421 Processome. To test the idea that Bud23 promotes disassembly events, we characterized pre-  
422 ribosomal particles in the absence of Bud23. We introduced a genomically encoded C-terminal  
423 Auxin-Induced Degron (AID) tag on Bud23 for rapid depletion of Bud23 upon the addition of the  
424 small molecule auxin without the need for shifting carbon sources (Nishimura et al., 2009). The  
425 *BUD23-AID* strain grew similar to wild-type cells on media lacking auxin, while it showed a growth  
426 defect comparable to the *bud23Δ* strain on media containing auxin indicating that the AID tag is  
427 functional and does not significantly impact Bud23 function (Fig. 6A). Bud23-AID was significantly  
428 depleted after 10 minutes and was undetectable after two hours of auxin treatment (Fig. 6B). We  
429 first asked if Bud23 depletion impacted the association of Imp4 with pre-40S particles. We  
430 depleted Bud23 for two hours and separated particles by ultracentrifugation on sucrose density  
431 gradients. Western blot analysis across the gradients showed that in wild-type cell extracts Imp4  
432 was present throughout the gradient but showed enrichment in the 40S to 80S fractions and near  
433 the top of the gradient (Fig. 6C). The population near the top of the gradient likely reflects its  
434 association with the Mpp10 sub-complex (Gallagher and Baserga, 2004; Gérczei and Correll,  
435 2004; Lee and Baserga, 1999) whereas the population at 80S reflects its association with the SSU  
436 Processome because U3 snoRNA also sedimented in this position. We also monitored the  
437 sedimentation of the biogenesis factor Enp1 harboring a C-terminal Tandem Affinity Purification

438 (TAP) tag. In wild-type cells, Enp1-TAP sedimented throughout the gradient indicating its known  
439 binding to both the SSU Processome and pre-40S particles, with enrichment at 40S reflecting its  
440 steady-state association with pre-40S particles (Schäfer et al., 2003). Upon depletion of Bud23-  
441 AID, both Imp4 and Enp1-TAP showed a loss of sedimentation in the 80S region while they  
442 maintained or increased sedimentation in the 40S region of the gradient. Surprisingly, U3 snoRNA  
443 sedimentation was not obviously affected. These results indicate that both Imp4 and Enp1  
444 remain associated with 40S precursor particles in the absence of Bud23 while their presence in  
445 the SSU Processome is depleted.

446 To further understand the nature of 40S precursors that accumulate in the absence of  
447 Bud23, we used Enp1-TAP as a bait for affinity purifications. Enp1-TAP is an ideal bait for these  
448 experiments as it binds to the SSU Processome, upstream of Bud23 binding, and is released  
449 downstream of Bud23 release (Schäfer et al., 2003). We affinity purified Enp1-TAP particles from  
450 WT and Bud23-AID strains after two hours of auxin treatment. Following elution, particles were  
451 sedimented through sucrose cushions to separate free Enp1 from preribosome-bound Enp1. The  
452 associated proteins were then separated by SDS-PAGE. The depletion of Bud23 lead to the  
453 reduction of three major protein species (Fig. 7A; black lines) and the accumulation of seven  
454 species (Fig. 7A; blue lines). Mass spectrometry identified the depleted proteins as the pre-40S  
455 factors Tsr1, Rio2, and Nob1, while mostly late-acting, SSU Processome factors comprised the  
456 accumulated factors. We further analyzed these particles by performing mass spectrometry on  
457 the entire samples. To determine the approximate stoichiometry of each protein, we calculated  
458 a relative spectral abundance factor (RSAF) for 40S biogenesis proteins by dividing the spectral  
459 counts for each protein by its molecular weight then normalizing this value to the bait, Enp1. This

460 analysis revealed the proteomic compositions of the wild-type and Bud23-depleted particles (Fig.  
461 S5 & Supplemental File 1). Although various proteins were accumulated or depleted from these  
462 particles, the levels of the proteins that showed genetic interaction with *bud23Δ* remained  
463 relatively constant in the absence of Bud23, with the exception of Utp2. We interpret this to  
464 indicate that particles are arrested upstream of the release of these factors where they remain  
465 stoichiometric with Enp1, the bait protein. To simplify our analysis, we calculated a log<sub>2</sub>-fold  
466 change between Bud23-depleted and wild-type particles for each protein and only considered  
467 proteins to be significant if they showed a  $\pm 0.5$ -fold increase or decrease with a difference of 10  
468 spectral counts (Fig. S6). This analysis revealed a set of 26 proteins that significantly changed  
469 upon Bud23-depletion. These results agreed with what we observed by SDS-PAGE in Fig. 7A in  
470 that there was an accumulation of mainly SSU Processome factors and a depletion of mostly pre-  
471 40S factors. With the exception of Utp2, the accumulated factors are not localized to the 3' basal  
472 subdomain, but several have late roles in the SSU Processome. Recent work suggests that Bfr2,  
473 Enp2, Lcp5, and Kre33, which accumulated in the absence of Bud23, help finalize structural  
474 compaction of the SSU Processome (Cheng et al., 2019) while Mrd1 may have a role in resolving  
475 the U3-5' ETS duplexes (Lackmann et al., 2018). Strikingly, the pre-40S factors Rio1 and Slx9  
476 accumulated in the absence of Bud23. While Slx9 functions in the nuclear export of pre-40S  
477 particles (Fischer et al., 2015), Rio1 acts during the final cytoplasmic pre-40S maturation steps  
478 (Ferreira-Cerca et al., 2014) significantly downstream of the point in which Bud23 acts. These  
479 results suggest that in the absence of Bud23, certain regions of the particle have progressed to a  
480 pre-40S state whereas other regions appear blocked in their progression.

481 We also probed for the rRNA intermediates that co-precipitated with Enp1-TAP in the  
482 presence and absence of Bud23 (Fig. 7B). We observed that Enp1 decreased association with the  
483 23S rRNA with a concomitant accumulation of both 21S and 22S RNAs in the absence of Bud23.  
484 By quantifying the amount of 22S relative to 35S detected with A0-A1 probe vs the amount of  
485 21S/22S relative to 35S detected with the A2-A3 probe we calculate that the 21S and 22S species  
486 are approximately equally abundant in the Enp1-TAP sample from Bud23-depleted cells. The  
487 accumulation of 21S and 22S indicates that processing at A2 was inhibited upon Bud23 depletion,  
488 as we have previously reported (White et al., 2008). The accumulation of 22S was unexpected as  
489 this indicates a defect in A1 cleavage as well. Furthermore, we saw a modest accumulation of the  
490 A0-cleaved 5' ETS rRNA (~1.5-fold) and U3 snoRNA (~1.2-fold). Consistent with what is seen in  
491 whole cell extracts of *bud23Δ* cells (Figs. 2E & 4B) (Sardana et al., 2014, 2013), we also saw that  
492 27SA2 intermediate was present in the input and IP for the wild-type sample, but totally absent  
493 in the Bud23-depleted sample (Fig. 7B). These results reconfirm that Bud23 is needed for efficient  
494 processing at A2 and support the possibility that Bud23 also impacts cleavage at A1.

## 495 Discussion

496 Bud23 was initially identified as the methyltransferase that modifies G1575 in 18S rRNA  
497 and is thought to act at a relatively late stage in nuclear 40S assembly (White et al., 2008).  
498 Although it is conserved from yeast to humans and deletion of *BUD23* in yeast leads to severely  
499 impaired growth, its methyltransferase activity is dispensable for ribosome assembly (White et  
500 al., 2008; Zorbas et al., 2015). This indicates that the primary function of Bud23 stems from its  
501 binding to 40S precursors. A recent structure of human Bud23 on pre-40S (Ameismeier et al.,  
502 2018) and the lack of a requirement for Bud23 in assembly of the SSU Processome are consistent

503 with the notion that Bud23 acts late in the nuclear assembly pathway. Nevertheless, there have  
504 been hints that Bud23 acts earlier than pre-40S. Notably, we previously reported that mutations  
505 in the RNA helicase Dhr1, its activator Utp14, Utp2, and Imp4, all canonical SSU Processome  
506 factors, suppress the growth defect of *bud23Δ* cells (Sardana, 2013; Sardana et al., 2014, 2013;  
507 Zhu et al., 2016). Because Dhr1 is the RNA helicase that unwinds U3 snoRNA from 18S rRNA  
508 (Sardana et al., 2015), a critical event during the remodeling of the SSU Processome to pre-40S,  
509 the functional interaction between Bud23 and Dhr1 suggests a role for Bud23 during this  
510 remodeling event. Here, we have provided a significant body of additional evidence to build a  
511 case for Bud23 having a direct role in the transition of the SSU Processome to pre-40S.

512         The majority of mutations that we found as suppressors of *bud23Δ* were in Imp4 and Dhr1  
513 with additional mutations in Bms1, Rps28A, Utp2, and Utp14. The Imp4 mutations clustered  
514 primarily in its interface with the 3' basal subdomain of rRNA opposite the binding site of Bud23  
515 and are predicted to be disrupting interactions (Fig. 2C). The Brix domain of Imp4 and the NTD of  
516 Utp2 contact one another (Fig. 3C), and we showed that suppressing mutations on either side of  
517 the Imp4-Utp2 interface disrupted the interaction between these proteins (Figs. 3D & 3F).  
518 Furthermore, many of the suppressing mutations in Dhr1 disrupted its interaction with its binding  
519 partner Utp14 (Fig. 5D). Lastly, mutations in Bms1 that may promote a conformational change  
520 within Bms1 were also identified as *bud23Δ* suppressors (Fig. 4F). The picture that emerges from  
521 this extensive network of genetic and physical interactions is that the absence of Bud23 can be  
522 bypassed by disrupting protein-protein and protein-RNA contacts that appear to be important  
523 for the structure of the SSU Processome. We also determined the proteomic and RNA  
524 composition of 40S precursors purified in the absence of Bud23 (Fig. 7). We observed an



525 accumulation of late SSU Processome factors and inefficiently processed rRNAs and the depletion  
526 of pre-40S factors. This atypical progression of the SSU Processome further underscores the role  
527 of Bud23 in the transition of the particle to the pre-40S. Thus, we propose that Bud23 binding to  
528 the 3' basal subdomain promotes remodeling of this region of the SSU Processome during its  
529 transition to the pre-40S particle. In the absence of Bud23, mutations that destabilize this region  
530 of the SSU Processome can suffice to promote this transition.

531         The network of genetic and physical interactions that we define in this work link Bud23  
532 to the functions of Dhr1 and Bms1. These two enzymes are thought to drive structural  
533 rearrangements critical to the transition of the SSU Processome to a pre-40S particle. Dhr1  
534 catalyzes U3 snoRNA removal (Sardana et al., 2015), while Bms1 may remodel RNA to allow A1  
535 cleavage (Cheng et al., 2017). The requirement of Dhr1 and Bms1 in disassembly of the SSU  
536 Processome is reminiscent of the relationship between the DExH RNA helicase Brr2 and the EF-  
537 G-like GTPase Snu114 that regulate Spliceosome disassembly (Small et al., 2006). In the case of  
538 the spliceosome, it is believed that nucleotide-dependent conformational changes in Snu114  
539 activate Brr2, mediated through the C-terminus of Snu114. It is possible that the actions of Dhr1  
540 and Bms1 are similarly coordinated. Bms1 has a globular GTPase domain composed of domains  
541 I-III that binds helices 15-18 of the 5'-domain of 18S rRNA while domain IV binds to the 3' basal  
542 subdomain. A long C-terminal helix of Bms1 extends into the SSU Processome and wedges  
543 between the U3 Boxes A and A' heteroduplexes with 18S rRNA (Figs. 1D & S3A), the substrates  
544 of Dhr1. In this way, Bms1 and Dhr1 can be directly linked mechanistically. We previously mapped  
545 the binding site of Dhr1 to U3 snoRNA immediately downstream of the Boxes A and A'  
546 heteroduplexes (Sardana et al., 2015). As Dhr1 is a DExH-box helicase it likely translocates in a 3'

547 to 5' manner (Boneberg et al., 2019) and would be poised to disrupt the U3 heteroduplexes.  
548 However, the helical extension of Bms1 with those of Utp2 and Imp4 could act as obstructions to  
549 control Dhr1 translocation.

550 The functional links of Bud23 with Bms1 and Dhr1 suggest that it may coordinate their  
551 activities. We suggest two possible mechanisms in which Bud23 binding facilitates SSU  
552 Processome progression. Following Utp14-dependent recruitment of Dhr1 (Black et al., 2018; Zhu  
553 et al., 2016), Dhr1 is positioned upstream of the U3-18S heteroduplexes where it is primed for  
554 activation, but the helical extensions of Bms1, Imp4, and Utp2 that embrace its substrate prevent  
555 Dhr1 access. (Fig. 8A). After completion of the SSU Processome, Bud23 binding to the 3' basal  
556 subdomain signals the GTPase activity of Bms1 (Fig. 8B). Subsequently, Bms1 drives structural  
557 rearrangements to displace the helical extensions allowing Dhr1 to progress forward through its  
558 substrate. Alternatively, Dhr1 could initiate unwinding of the U3 Box A-18S duplex until it runs  
559 into the helical extensions of Bms1, Imp4, and Utp2 where they act as a physical barrier (Fig. 8C).  
560 At this point, entry of Bud23 into the particle induces Bms1 activation. Subsequent removal of  
561 the helices would allow Dhr1 to translocate through the U3 Box A'-18S duplex. Additional  
562 biochemical and structural work will be needed to determine if either of these models is correct.

563 While our data indicate that Bud23 binding assists in the progression of the SSU  
564 Processome, how Bud23 binding is transduced to Bms1 or Dhr1 is unclear. Bud23 could promote  
565 transition by one of several different and not mutually exclusive means. The binding of Bud23  
566 could alter the structure of the 3' basal subdomain RNA, facilitating the release of factors.  
567 However, we note that the structure of the 3' basal subdomain RNA remains virtually unchanged  
568 between the SSU Processome structure and the Bud23-bound pre-40S. This suggests that Bud23

569 binding does not directly alter the RNA structure to promote release of Imp4 and associated  
570 factors. In the SSU Processome structures, the future binding site of Bud23 is occupied by the  
571 methyltransferase Emg1 (Barandun et al., 2017; Cheng et al., 2017; Sun et al., 2017). It is possible  
572 that Bud23 is needed for the release of Emg1 to set in motion disassembly of factors from the 3'  
573 basal subdomain. This model predicts that Emg1 would accumulate on particles upon Bud23  
574 depletion, a result that we did not observe (Figs. 7A & S6).

575         Furthermore, an additional consideration that must be made is that *BUD23* is not  
576 essential. One would expect that if Bud23 binding to the SSU Processome was absolutely required  
577 for its progression that Bud23 would be essential. Deletion of Bud23 causes a roughly 70%  
578 reduction in 40S relative to 60S (White et al., 2008), suggesting that Bud23 is needed to produce  
579 the majority of 40S. Interestingly, roughly 70% of rRNA processing occurs co-transcriptionally  
580 with the remaining 30% occurring post-transcriptionally (Kos and Tollervey, 2010). Cleavage at  
581 the A2 site appears to reflect co-transcriptional processing while cleavage at the A3 site is  
582 observed in post-transcriptional processing. Thus, the post-transcriptional pathway may be the  
583 primary processing pathway used in *bud23Δ* mutants. Consistent with this idea, *bud23Δ* shows a  
584 strong negative genetic interaction with components of the RNase MRP complex responsible for  
585 processing A3 (Sardana et al., 2013). This suggests that the progression of the SSU Processome  
586 in the post-transcriptional pathway follows a Bud23-independent mechanism that differs from  
587 the model that we have proposed in this study. Because the functions of Bms1 and Dhr1 are  
588 indispensable such an alternative mechanism most likely still requires their enzymatic activities.  
589

590 **Is Bud23 needed for A1 cleavage in addition to A2 processing?** Processing of the rRNA is initiated  
591 cotranscriptionally on the primary 35S transcript by cleavage at site A0. Subsequent cleavages at  
592 A1 and A2 liberate the 20S rRNA intermediate found in the pre-40S particle that is exported to  
593 the cytoplasm. Current structures of the SSU Processome contain RNA cleaved at A0, but not A1  
594 (Barandun et al., 2017; Cheng et al., 2017) consistent with our understanding that A0 cleavage is  
595 prior to A1. In these structures, the A2 site within ITS1 is not resolved, but Northern blotting  
596 suggests that it is not cleaved (Chaker-Margot et al., 2017; Sun et al., 2017). How cleavage at A1  
597 and A2 are regulated is not understood but it has been postulated that conformational changes  
598 driven by Bms1 reposition the endonucleolytic PIN domain of Utp24 for cleavage at A1 (Cheng et  
599 al., 2017).

600 We previously showed that in the absence of Bud23, A2 cleavage is inhibited (White et  
601 al., 2008). Consistent with this conclusion, we found that 21S RNA (cleaved at A1 and A3 but not  
602 A2) accumulated in whole cell extracts of *bud23Δ* mutants (Figs. 2E & 4B) and in pre-40S particles  
603 affinity purified with Enp1 when Bud23 was depleted (Fig. 7B). We were surprised that in addition  
604 to 21S RNA, we observed approximately equivalent amounts of 22S RNA in these particles. 22S  
605 RNA arises when cleavages at both A1 and A2 are blocked. This result suggests that, in the  
606 absence of Bud23, processing at A1 is slowed while A2 processing is strongly inhibited. Moreover,  
607 this result links Bud23 to A1 cleavage and suggests that Bud23 acts at an earlier step in pre-40S  
608 assembly than previously thought. Intriguingly, we found that mutations in Bms1 suppress the  
609 absence of Bud23 suggesting that Bud23 could impinge on A1 cleavage through Bms1. The C-  
610 terminal domain of Bms1 is thought to remodel RNA to allow Utp24 to access the A1 site (Cheng  
611 et al., 2017). The C-terminal domain connects to domain IV of Bms1 through an unstructured

612 strand that lays over domain III, and it is in this interface that we find most of the *bud23Δ*-  
613 suppressing mutations. Bms1 is structurally related to EF-Tu (Fig. S4A), which delivers  
614 aminoacylated tRNAs to the ribosome (reviewed in (Maracci and Rodnina, 2016)). Activation of  
615 EF-Tu GTPase activity induces conformational changes that release the tRNA. Intriguingly, in the  
616 SSU Processome structure, it is the C-terminal connector strand of Bms1 as well as a helix of  
617 Mpp10 that occupy the volume corresponding to tRNA in EF-Tu (Figs. S4E & S4F). Thus, the  
618 GTPase activity of Bms1 could induce a conformational change to release the C-terminal  
619 connector, repositioning Utp24 for A1 cleavage. Because mutations in Bms1 that are poised to  
620 release the C-terminal connector bypass the absence of Bud23, Bud23 recruitment to the SSU  
621 Processome could trigger Bms1 conformational changes. Intriguingly, *bud23Δ* also shows strong  
622 negative genetic interaction with a hypomorphic *utp24* allele (Sardana et al., 2013). In this work  
623 we have used a genetic approach to develop a conceptual framework for understanding the  
624 progression of the SSU Processome into the pre-40S particle. Biochemical and structural analysis  
625 are now needed to test the ideas that we have presented here.

626

## 627 **Materials and methods**

628 **Strains, growth media, genetic methods, and yeast two-hybrid (Y2H) analysis.** All *S. cerevisiae*  
629 strains and sources are listed in Table 1. AJY2676 was generated by genomic integration of *EcoRI*-  
630 digested pAJ4339 (Tong et al., 2001) into AJY2161 to replace the *KanMX* marker with *CloNAT*.  
631 AJY3156 was generated by genomic integration of *bud23Δ::KanMX* into AJY2665. AJY4175 was  
632 generated by transforming pAJ4094 into a *UTP2/utp2Δ::KanMX* heterozygous diploid strain  
633 (Winzeler et al., 1999), sporulated, and dissected. AJY4395 was generated by genomic integration

634 of *AID-HA::OsTIR1::LEU2* amplified from pJW1662 (Costa et al., 2018) into the *BUD23* locus of  
635 AJY2665. All yeast strains were cultured at 30°C in either YPD (2% peptone, 1% yeast extract, 2%  
636 dextrose), YPgal (2% peptone, 1% yeast extract, 1% galactose), or synthetic dropout (SD) medium  
637 containing 2% dextrose unless otherwise noted. When appropriate, media were supplemented  
638 with 150 to 250 µg/ml G418 or 100 µg/ml nourseothricin. All plasmids and sources are listed in  
639 Table 2. Y2H analysis was performed as previously described (Black et al., 2018).

640

641 **Identification of additional spontaneous suppressors of *bud23Δ*.** AJY2676 cells were inoculated  
642 into 200 µL of YPD media in a 48-well format plate. Cells were cultured with continuous shaking  
643 until saturation then diluted into fresh media. After each passage, cells were plated onto YPD  
644 plates to test for the presence of suppressors. This process was iterated for each culture until  
645 suppressors were observed. Single colonies of each suppressor strain were obtained and genomic  
646 DNA was prepped using MasturePure™ Yeast DNA Purification Kit (Lucigen). The *DHR1*, *IMP4*,  
647 *UTP2*, and *UTP14* loci were amplified and sequenced by Sanger to identify mutations in known  
648 suppressors (Sardana, 2013; Sardana et al., 2014, 2013; Zhu et al., 2016).

649 Libraries for the six strains that did not carry suppressors in *DHR1*, *IMP4*, *UTP2* or *UTP14*  
650 were prepared and sequenced on an Illumina NextSeq 500 platform by the Genomic Sequencing  
651 and Analysis Facility at the University of Texas at Austin. The quality of the resultant reads was  
652 assessed using FastQC (v0.10.1) [<http://www.bioinformatics.babraham.ac.uk/projects/fastqc/>],  
653 and subsequently processed using TrimGalore (v1.14)  
654 [[http://www.bioinformatics.babraham.ac.uk/projects/trim\\_galore/](http://www.bioinformatics.babraham.ac.uk/projects/trim_galore/)] to discard low-quality  
655 sequences and adapters. The processed reads were aligned using Bowtie2 (v2.3.4) (Langmead

656 and Salzberg, 2012) using the default settings for paired-end reads. The resultant files were  
657 further processed with SAMtools (v0.1.18) (Li et al., 2009) and BCFtools (v0.1.17) (Narasimhan et  
658 al., 2016) to generate variant call format files. VCFtools (v0.1.16) (Danecek et al., 2011) was used  
659 to filter out variants with low quality scores (Quality value < 100) and to compare samples  
660 pairwise to identify mutations unique to each suppressed strain. This analysis revealed single  
661 point mutations within *BMS1* and *RPS28A* that were confirmed by Sanger sequencing. The *bms1*  
662 and *rps28a* variants were subsequently cloned into centromeric vectors and, as with all other  
663 *bud23Δ* suppressors that we have identified, the *rps28A* and *bms1* mutants were dominant (data  
664 not shown). All mutant strains isolated in this screen are listed in Table 1.

665

666 **Identification of mutations in *UTP2* that suppress *bud23Δ*.** Random mutations in *UTP2* were  
667 generated by error-prone PCR using *Taq* polymerase and pAJ2595 as the template and oligos that  
668 hybridize to the upstream and downstream sequences of *UTP2*. The restriction enzymes *EcoRI*  
669 and *SphI* were used to linearize the vector pAJ2595 and the linearized vector was, co-transformed  
670 with the mutant amplicon into AJY2161, and plated onto SD-Uracil media to allow recombination  
671 of the mutant amplicon into the pAJ2595 backbone. Colonies displaying a suppressed phenotype  
672 were isolated; vectors were rescued from yeast and sequenced after confirming that the vectors  
673 conferred suppression.

674

675 **Affinity purification.** Cells were cultured as described in the Northern blotting and mass  
676 spectrometry subsections below. All steps were carried out on ice or at 4°C. Cells were washed  
677 with Lysis Buffer (50 mM Tris-HCl pH 7.6 (25°C), 100 mM KCl, 5 mM MgCl<sub>2</sub>, 5 mM beta-

678 mercaptoethanol ( $\beta$ ME), 1 mM each of PMSF and Benzamidine, and 1  $\mu$ M each of leupeptin and  
679 pepstatin) supplemented with EDTA-free Pierce Protease Inhibitor Mini Tablet cocktail (Thermo  
680 Scientific), then resuspended in 1 volume Lysis Buffer. Extracts were generated by glass bead lysis  
681 and clarified at 18,000g for 15 minutes. Clarified extracts were normalized according to  $A_{260}$  and  
682 supplemented with 0.1% TritonX-100. Normalized extracts were incubated for 1.5 hours with  
683 rabbit IgG (Sigma) coupled to Dynabeads (Invitrogen), prepared as previously described  
684 (Oeffinger et al., 2007). Following binding, the beads were washed thrice with Wash Buffer (Lysis  
685 Buffer supplemented with 0.1% TritonX-100). The beads were resuspended in Elution Buffer  
686 (Wash Buffer supplemented with TEV protease and Murine RNase Inhibitor (New England  
687 Biolabs)) and the bound Enp1-TAP containing complexes were eluted for 1.5 – 2 hours. The  
688 resultant eluates were handled as described in the Northern blotting and mass spectrometry  
689 subsections below.

690

691 **Northern blot analysis.** For analysis of rRNA processing in whole cell extract (WCE), strains were  
692 cultured overnight in YPD media to saturation. Cell cultures were diluted into YPD at a starting  
693  $OD_{600}$  of 0.1 and cultured to mid-exponential phase ( $OD_{600} \sim 0.4-0.5$ ) before collection and storage  
694 at  $-80^{\circ}\text{C}$  prior to lysis. For analysis of affinity purified RNAs, strains AJY2665 and AJY4395 were  
695 cultured overnight in YPD media to saturation. Cells were diluted into YPD at a starting  $OD_{600}$  of  
696 0.05 and cultured for three hours. Cultures were treated with 0.5 mM auxin for 2 hours at  $30^{\circ}\text{C}$ ,  
697 centrifuged, and frozen in liquid nitrogen. Affinity purification was performed as described above.  
698 Affinity purified and WCE RNAs were isolated using the acid-phenol-chloroform method as  
699 previously described (Zhu et al. 2016). RNAs were electrophoresed through 1.2%-agarose MOPS



700 6% formaldehyde gel. Northern blotting was performed as previously described (Li et al. 2009)  
701 using the oligo probes listed in the legends of Figures 2 and 7, and signal was detected by  
702 phosphoimaging on a GE Typhoon FLA9500.

703

704 **Mass spectrometry and analysis.** Strains AJY2665 and AJY4395 were cultured as described in the  
705 Northern blot analysis subsection. Affinity purifications were performed as described above. To  
706 isolate factors associated with only preribosomal particles, the eluate was overlaid onto a sucrose  
707 cushion (15% D-sucrose, 50 mM Tris-HCl pH 7.6 (25°C), 100 mM KCl, 5 MgCl<sub>2</sub>) then centrifuged  
708 at 70,000 rpm for 15 min in a Beckman Coulter TLA100 rotor. Following, the pellets were  
709 precipitated with 15% trichloroacetic acid (TCA), washed with acetone and dried, and  
710 resuspended in 1X Laemmli buffer. Approximately equivalent amounts of protein were either  
711 fully separated on SDS-PAGE gels for excision of individual species or electrophoresed slightly  
712 into a NuPAGE Novex 4%–12% Bis-Tris gel for analysis of the entire affinity purification. Peptides  
713 were recovered from in-gel Trypsin digestion and prepared for identification by mass  
714 spectrometry as previously described (Black et al., 2018). The resultant peptides were identified  
715 at The University of Texas at Austin Proteomics Facility by LC-MS/MS on a Thermo Orbitrap  
716 Fusion 1 with either a 30 minute or 1 hour run time for identification of single species or complex  
717 sample, respectively. Mass spectrometry data were processed in Scaffold v4.8.3 (Proteome  
718 Software, Inc.). A protein threshold of 99% minimum with two peptides minimum and peptide  
719 threshold of 1% false discovery rate was applied. The data were exported, and custom Python  
720 2.7 scripts were used to calculate the relative spectral abundance factor (RSAF) for each protein  
721 by dividing the total number of spectral counts by the molecular weight. Values for each protein

722 were normalized to the bait, Enp1, to reflect relative stoichiometry. Supplemental File 1 contains  
723 relevant spectral counts and processed data from the mass spectrometry experiments.

724

725 **Sucrose density gradient analysis.** For polysome profile analysis of the suppressors of *bud23Δ*,  
726 BY4741, AJY2676, AJY3744, AJY4529, AJY4531, and AJY4535 were cultured overnight in YPD to  
727 saturation. Cultures were diluted into YPD at a starting OD<sub>600</sub> of 0.02 and cultured to early  
728 exponential phase (OD<sub>600</sub>~0.10-0.13) and then treated with cycloheximide (CHX) at 100 µg/ml for  
729 10 minutes at 30°C to inhibit translation. After centrifugation cells were frozen in liquid nitrogen  
730 and stored at -80°C. Cells were washed and resuspended in Lysis Buffer (50 mM Tris-HCl pH 7.6  
731 (25°C), 100 mM KCl, 5 mM MgCl<sub>2</sub>, 7 mM βME, 100 µg/mL CHX, 1 mM each of PMSF and  
732 Benzamidine, and 1 µM each of leupeptin and pepstatin). Extracts were prepared by glass bead  
733 lysis and clarified by centrifugation for 15 minutes at 18,000g at 4°C. 4.5 A<sub>260</sub> units of clarified  
734 extract were loaded onto 7-47% sucrose gradients made in the same buffer lacking protease  
735 inhibitors. Gradients were subjected to ultracentrifugation for 2.5 hours at 40,000 rpm in a  
736 Beckman SW40 rotor. The gradients were subjected to continuous monitoring at 254 nm using  
737 an ISCO Model 640 fractionator.

738 For analysis of the sedimentation of factors in the absence of Bud23, AJY2665 and  
739 AJY4395 were cultured overnight to saturation. Cells were diluted into YPD at a starting OD<sub>600</sub> of  
740 0.05 and cultured for three hours (OD<sub>600</sub> ≈ 0.08-0.1). Cultures were treated with 0.5 mM auxin  
741 for 2 hours at 30°C, then treated with CHX at 100 µg/mL for 10 minutes at 30°C. Cells were  
742 harvested and stored as described above. Cells were washed and resuspended in Lysis Buffer  
743 supplemented with an EDTA-free Pierce Protease Inhibitor Mini Tablet cocktail (Thermo

744 Scientific). Extracts were generated, and nine A<sub>260</sub> units were loaded onto sucrose gradients and  
745 subject to ultracentrifugation as described above. Gradients were fractionated into 600 µL  
746 fractions with continuous monitoring at 254 nm using an ISCO Model 640 fractionator. Each  
747 fraction was split in half to collect proteins and RNAs. Proteins were precipitated using 15% TCA  
748 as described previously (Black et al., 2018). One-fifth of protein from each half fraction was  
749 separated on SDS-PAGE gels and subjected to Western blotting. RNAs were precipitated as  
750 described previously (Musalgaonkar et al., 2019) supplemented with 10 µg of glycogen. One-third  
751 of RNA from each half fraction was subjected to Northern blotting as described above.

752

753 **Western blot analysis.** Primary antibodies used in this study were anti-c-Myc monoclonal 9e10  
754 (Biolegend), anti-HA (Biolegend), anti-Bud23 (C. Wang), anti-Rps24 (our laboratory), anti-  
755 Glucose-6-phosphate dehydrogenase (Sigma ImmunoChemicals), and anti-Imp4 (S. Baserga).  
756 Secondary anti-bodies were goat anti-mouse antibody-IRDye 800CW (Li-Cor Biosciences), goat  
757 anti-rabbit antibody-IRDye 680RD (Li-Cor Biosciences), and goat anti-rabbit antibody-HRP  
758 (Jackson ImmunoResearch Laboratories). The blots in Figs. 3D, 3F, 5C, and 6B were imaged with  
759 an Odyssey CLx infrared imaging system (Li-Cor Biosciences) using Image Studio (Li-Cor  
760 Biosciences). The blots in Fig. 6C were imaged using SuperSignal West Pico PLUS  
761 Chemiluminescent Substrate (Thermo Scientific) and exposed to film.

762

763 **Molecular visualization.** All images of SSU Processome and Dhr1 structures are from PDB  
764 ascension codes 5WLC and 6H57, respectively. The structures of GDPNP- and GDP-bound EF-Tu

765 are from PDB ascension codes 1B23 and 1EFC, respectively. Molecular visualizations were  
766 generated using MacPyMOL: PyMOL v1.8.2.1 Enhanced for Mac OS X (Schrödinger LLC).

767

## 768 **Figure legends**

769 **Figure 1. Extragenic suppressors of *bud23Δ* reveal an interaction network that connects the 3'**  
770 **basal subdomain to the U3-18S heteroduplexes.** (A) A secondary structure map of the 18S rRNA  
771 that indicates the position of the 3' basal subdomain (dark gray) and the central pseudoknot (CPK;  
772 deep olive). (B) The position of the 3' basal subdomain (dark gray) within the context of the SSU  
773 Processome structure (light gray). (C) Factors harboring mutations that suppress *bud23Δ* and are  
774 resolved in the SSU Processome (PDB 5WLC) cluster around the 3' basal subdomain and the U3-  
775 Box A'-18S heteroduplex that Dhr1 unwinds. Shown are: Bms1 (forest green), Imp4 (blue), Rps28  
776 (cyan), Utp2 (orange), Utp14 (brown), U3 (deep purple), 18S rRNA (deep olive), 3' basal  
777 subdomain (dark gray). (D) Zoomed view of factors in C showing contacts amongst each other,  
778 the 3' basal subdomain, and the U3-Box A'-18S heteroduplex. N- and C-terminal domains, NTD  
779 and CTD, respectively. The U3-18S heteroduplexes are shown as U3 Box A and U3 Box A'.  
780 Guanosine 1575 (G1575, red) is shown as a marker for the binding site of Bud23. (E) Tabulation  
781 of the number of unique mutations found in each extragenic suppressor of *bud23Δ*. Newly  
782 identified mutations (novel) and previously identified (known) (Sardana, 2013; Sardana et al.,  
783 2014, 2013; Zhu et al., 2016). (F) Summary of the genetic and physical interactions amongst the  
784 suppressors of *bud23Δ*. Factors are indicated as nodes; genetic and physical interactions are  
785 shown as dashed and solid edges, respectively.

786

787 **Figure 2. The *Imp4* and *Rps28A* mutations primarily map to their interfaces with the 3' basal**  
788 **subdomain.** (A) Point mutations within *imp4* and *rps28a* suppressed the growth defect of *bud23Δ*  
789 as shown by 10-fold serial dilutions of wild-type cells (BY4741), *bud23Δ* (AJY2676), and *bud23Δ*-  
790 suppressed cells spotted on YPD media and grown for two days at 30°C. (B) Rps28 and the Brix  
791 domain of *Imp4* interact with the 3' basal subdomain RNA, while the NTD of *Imp4* makes contacts  
792 with its Brix domain and the U3-18S heteroduplexes. G1575, the binding site of *Bud23*, is shown  
793 for reference. The regions where the mutated residues map are indicated by magenta and green  
794 dashed boxes for the rRNA interaction and the NTD interaction, respectively. Factors are colored  
795 the same as in Fig. 1. (C) Residues mutated in *Rps28* and *Imp4* Brix domain map to interaction  
796 interfaces with the 3' basal subdomain RNA (magenta sticks). (D) Several residues mutated in  
797 *Imp4* map to an intramolecular interaction between the Brix and NTD of *Imp4* (green sticks). (E)  
798 Suppressing mutations in *imp4* and *rps28a* partially restored A2 processing and 18S rRNA levels  
799 in *bud23Δ* cells. RNA processing intermediates were detected by Northern blotting on RNAs  
800 extracted from wild-type (WT), *bud23Δ*, and *bud23Δ*-suppressed cells cultured to exponential  
801 phase at 30°C in liquid YPD. P32-radiolabeled probes (Table 3) hybridized to the indicated regions.  
802 The 25S and 18S rRNAs were detected by methylene blue staining of the RNAs prior to oligo  
803 hybridization. (F) The *imp4* and *rps28a* mutations partially restored 40S biogenesis as shown by  
804 polysome profiles after separation of extracts on sucrose density gradients from wild-type,  
805 *bud23Δ*, and *bud23Δ*-suppressed cells cultured to exponential phase at 30°C in liquid YPD media.  
806  
807 **Figure 3. The mutations in *Utp2* disrupted its interaction with *Imp4*.** (A) Spontaneous point  
808 mutations within *utp2* partially suppressed the growth defect of *bud23Δ* as shown by 10-fold

809 serial dilutions of wild-type cells (BY4741), *bud23Δ* (AJY2676), and *bud23Δ*-suppressed cells  
810 spotted on YPD media and grown for two days at 30°C. (B) Additional point mutations in *UTP2*,  
811 generated by error-prone PCR, also suppressed the growth defect of *bud23Δ* (left) and  
812 complemented loss of *UTP2* (right) as shown by 10-fold serial dilutions of *bud23Δ* (AJY2676) and  
813 *PGAL10-UTP2* (AJY4175) cells containing either empty vector, or vectors encoding the indicated  
814 alleles of *UTP2* spotted on SD-Leu media containing glucose and grown for two days at 30°C. (C)  
815 Several of the mutations in Utp2 map to residues (green sticks) located within its NTD (orange)  
816 that interacts with the Brix domain of Imp4 (blue) adjacent to the 3' basal subdomain RNA (gray).  
817 (D) Left: Yeast two-hybrid interaction assay between Imp4 and wild-type (WT) or mutant Utp2.  
818 Strains carrying the indicated constructs were patched onto Leu- Trp- (L-W-) and Leu-Trip-His- (L-  
819 W-H-) media supplemented with 2 mM 3-Amino-1,2,4-triazole (3AT) (AD, Gal4 activation domain;  
820 BD, Gal4 DNA binding domain). Right: Western blot analysis of the wild-type and mutant Utp2-  
821 AD-HA proteins using equivalent amounts of total protein extracts. Glucose-6-phosphate  
822 dehydrogenase (G6PDH) was used as a loading control. (E) Top: F58 of Utp2 (green sticks) fits  
823 into a hydrophobic pocket in the Brix domain of Imp4 (surface representation). Bottom: The  
824 *bud23Δ*-suppressing mutations V170F and P252L of Imp4 (magenta sticks) line this pocket. Imp4  
825 and Utp2 are colored blue and orange, respectively. (F) Top: Yeast two-hybrid interaction assay  
826 between Utp2 and wild-type or mutant Imp4. Strains carrying the indicated constructs were  
827 patched onto L-W- and L-W-H- media supplemented with 6 mM 3AT. Bottom: Western blot  
828 analysis of the wild-type and mutant BD-myc-Imp4 proteins in equivalent amounts of total  
829 protein extract is shown. G6PDH was used as a loading control.  
830

831 **Figure 4. The mutations in the GTPase Bms1 that suppress *bud23Δ* are poised to modulate its**  
832 **conformational state.** (A) Spontaneous point mutations within *BMS1* suppressed the growth  
833 defect of *bud23Δ* as shown by 10-fold serial dilutions of wild-type cells (BY4741), *bud23Δ*  
834 (AJY2676), and *bud23Δ* cells carrying the indicated *bms1* mutations spotted on YPD media and  
835 grown for two days at 30°C. (B) The *bms1* mutations partially restored A2 processing and 18S  
836 rRNA production in *bud23Δ* cells as shown by Northern blotting of RNAs extracted from wild-  
837 type, *bud23Δ*, and *bud23Δ*-suppressed cells as described in Fig. 2E. (C) The *bms1* mutations  
838 partially restored 40S biogenesis as shown by the analysis of the polysome profiles from the  
839 indicated strains as described in Fig. 2F. (D) Top: Primary structure of Bms1 with domains (in  
840 different shades of green), interacting regions and *bud23Δ* suppressing mutations annotated;  
841 regions not resolved in SSU Processome structures are indicated in light gray. Bottom: The partial  
842 structure of Bms1 (from PDB 5WLC) in the context of the SSU Processome is shown. Domains IV  
843 and V extend from its GTPase core (domains I – III) to contact the RNAs of the 3' basal subdomain  
844 (gray) and the U3-18S heteroduplexes (pink/gold), respectively. (E) At the 3' basal subdomain,  
845 Domain IV of Bms1 also contacts the CTDs of Utp2 (orange) and Imp4 (blue). (F) The mutated  
846 residues D124, D843, A903, and S1020 in Bms1 map to inter-domain contacts with the  
847 unstructured strand of domain V that connects it to domain IV.

848

849 **Figure 5. Most of the Dhr1 mutations map to surface residues of its RecA domains.** (A) A cartoon  
850 of the primary structure of Dhr1 is shown. The domains of Dhr1 are annotated by color: NTD, N-  
851 terminal domain (light gray); RecA1/2, Recombination protein A1/2 (blue/green); WH, winged-  
852 helix (yellow); HB, helical bundle (orange); OB, oligonucleotide-binding fold (brown); CTD, C-

853 terminal domain (light red). Unstructured regions are colored as light gray. Mutations reported  
854 here (novel) and previously (known) (Sardana et al., 2014) are indicated as black and magenta,  
855 respectively. Numbering indicates residue numbering of yeast Dhr1. (B) The structure of yeast  
856 Dhr1 (PDB 6H57) with relevant features colored as described in panel A. Catalytic residues  
857 involved in ATP hydrolysis are denoted as red sticks for reference. (C) The majority of the mutated  
858 residues map to the surfaces of the RecA domains. Mutated residues are shown as black and  
859 magenta sticks as described for panel A. The positions of the residues that were used to test loss-  
860 of-interaction with Utp14 in panel D are indicated. (D) Top: Yeast two-hybrid interaction data  
861 between AD-HA-Utp14 and wild-type (WT) or mutant BD-myc-Dhr1 are shown. Strains carrying  
862 the indicated constructs were patched onto Leu- Trp- (L-W-) and Leu-Trip-His- (L-W-H-) media  
863 supplemented with 10 mM 3-Amino-1,2,4-triazole (3AT) (AD-HA, GAL4AD-HA; BD-myc, GAL4BD-  
864 myc). Bottom: Western blot analysis of the wild-type and mutant BD-myc-Dhr1 proteins using  
865 equivalent amounts of total protein extracts is shown. Glucose-6-phosphate dehydrogenase  
866 (G6PDH) was used as a loading control.

867

868 **Figure 6. Imp4 and Enp1 accumulate with pre-40S upon Bud23 depletion.** (A) The genomic  
869 fusion of an auxin-inducible degron (AID) to the C-terminus of Bud23 rendered cells sensitive to  
870 auxin, with a growth defect comparable to *bud23Δ*. 10-fold serial dilutions of wild-type  
871 (AJY2665), *BUD23-AID* (AJY4395), and *bud23Δ* (AJY3156) cells were spotted on YPD media with  
872 and without 0.5 mM auxin and grown for two days at 30°C. (B) Western blot of time-course of  
873 depletion of Bud23-AID, using equivalent amounts of total protein extract from AJY2665 or  
874 AJY4395 cells cultured to exponential phase then harvested prior to or after the addition of 0.5



875 mM auxin for the indicated time (WT; wild-type). G6PDH was used as a loading control. (C) The  
876 sucrose density gradient sedimentation of SSU Processome factors in the presence (left panel) or  
877 absence (right panel) of Bud23. Extracts were prepared from + Bud23 (AJY2665) and - Bud23  
878 (AJY4395) cells treated with 0.5 mM auxin for two hours prior. Western blots were done for Enp1,  
879 Imp4 and Rps24. U3 snoRNA was detected by Northern blotting with a complementary P32-  
880 radiolabeled probe. 25S and 18S were visualized with methylene blue stain. Oligo probes are  
881 listed in Table 3.

882

883 **Figure 7. Composition of 40S precursors purified in the absence of Bud23.** (A) Coomassie-  
884 stained gel of proteins that co-purified with Enp1-TAP in the presence (+) or absence (-) of Bud23.  
885 Pre-ribosomal particles were enriched by overlaying eluate onto sucrose cushions followed by  
886 ultracentrifugation. Individual species that showed clear enrichment or depletion were excised  
887 and identified by mass spectrometry and are indicated in blue or black text, respectively. The  
888 asterisks (\*) denote proteins that also appeared in the analysis described in Fig. S6. (B) The rRNA  
889 processing intermediates and U3 snoRNA that co-purified with Enp1-TAP in the presence (+) or  
890 absence (-) of Bud23 were detected by Northern blotting using the indicated probes. Oligos are  
891 listed in Table 3.

892

893 **Figure 8. Models for Bud23 function in SSU Processome progression.** (A) A cartoon 2-  
894 dimensional projection of Fig. 1D showing factors surrounding the 3' basal subdomain (gray) and  
895 U3-18S heteroduplexes (magenta/gold). During assembly of the SSU Processome, multiple  
896 contacts are formed amongst Bms1 (green), Imp4 (blue), and Utp2 (orange). These three proteins

897 contain long helical extensions that support the U3-18S heteroduplexes but block their access by  
898 Dhr1 (light blue). Bms1, Imp4, and Utp2 all have extensive interactions with the 3' basal  
899 subdomain rRNA that connect events here to the U3-18S heteroduplexes. In this state, U3 is  
900 inaccessible by Dhr1. Two possible mechanisms can occur here. (B) After final SSU Processome  
901 compaction, Bud23 (yellow) binds to the 3' basal subdomain and signals to Bms1 to activate its  
902 GTPase domain. This, in turn, leads to conformational changes that displace the helical  
903 extensions of these proteins away from the U3-18S heteroduplexes allowing Dhr1 to gain access  
904 so that it can unwind it to initiate SSU Processome progression. (C) Alternatively, Dhr1 may first  
905 translocate through the U3 Box A-18S heteroduplex until it is stopped by the helical extensions.  
906 In this model, Bud23 binding to the 3' basal subdomain signals to Bms1 as in panel B. Bms1  
907 activity drives conformational changes to allow Dhr1 to continue its translocation through the U3  
908 Box A'-18S heteroduplex allowing subsequent SSU Processome progression to occur.

909

## 910 **Supplemental figure legends**

911 **Figure S1. Schematic of rRNA processing relevant to 40S production in *S. cerevisiae*.** Processing  
912 of the pre-18S rRNA at sites A0, A1, and A2 (or A3) occurs within the context of the SSU  
913 Processome. Cleavage at either the A2 or A3 sites liberates the SSU precursors from the LSU  
914 precursors containing the 27SA2 and 27SA3 rRNA intermediates, respectively. Processing of A0,  
915 A1, and A2 (or A3) appear to occur in a sequential order to produce the 20S rRNA intermediate.  
916 The 20S rRNA is a component of the pre-40S particles that are exported to the cytoplasm where  
917 a final cleavage event at the D site yields the 18S rRNA.

918

919 **Figure S2. Secondary structure diagram of the 18S rRNA.** The 18S rRNA is divided into four main  
920 domains: the 5' domain (blue), Central domain (gold), 3' Major domain (purple and black), and  
921 the 3' Minor domain (green). The 3' basal subdomain (black) is a sub-region of the 3' Major  
922 domain that forms during the assembly of the SSU Processome (Sun et al., 2017), and contains  
923 the binding site for Bud23. The base methylated by Bud23, guanosine 1575 (G1575, red) is  
924 indicated. The position of the Central Pseudoknot (CPK, gray) is also pictured.

925

926 **Figure S3. The position of Utp14 and the binding site of Dhr1 within the SSU Processome.** (A)  
927 The location of the resolved segments of Utp14 (brown) in the SSU Processome. A contour line  
928 indicates the unresolved region of Utp14 where the Dhr1-interaction surface and *bud23Δ*-  
929 suppressing mutations are located. The U3 snoRNA binding site of Dhr1 and U3 mutations that  
930 suppress a cold-sensitive Dhr1 mutant (Sardana et al., 2015) are indicated by cyan and black  
931 sticks, respectively. Bms1, Imp4, Rps28, Utp2, and the 3' basal subdomain RNA are shown for  
932 reference. (B) A cartoon of Utp14 primary structure indicating the position of its resolved  
933 portions and the *bud23Δ*-suppressing mutations reported here (black) and previously (light blue)  
934 within its Dhr1-activation loop (Zhu et al., 2016).

935

936 **Figure S4. Comparison of the structure of Bms1 to the conformational states of EF-Tu.** (A)  
937 Structural alignment of EF-Tu bound to the non-hydrolysable GTP analog, GDPNP (slate blue, PDB  
938 1B23) to domain I of Bms1 (from PDB 5WLC) is shown. Bms1 is colored by domains as in Fig. 4D;  
939 the GTP analog and magnesium ion bound to EF-Tu are shown as orange sticks and green sphere.  
940 Structures are shown individually (left, middle) and as an overlay (right). (B) A view of domains II

941 and III of Bms1 compared to those of EF-Tu shows that the two domains adopt beta barrels in  
942 similar conformations. (C) GDPNP-bound EF-Tu forms a complex with tRNA, while GDP-bound EF-  
943 Tu (deep purple, PDB 1EFC) does not. (D) Conformational differences in the beta-barrel domains  
944 of GDP and GTP-bound EF-Tu suggest that these domains rotate away from one another upon  
945 GTP hydrolysis to promote tRNA release. (E) The amino-acyl tRNA contacts GDPNP-bound EF-Tu  
946 through its two beta barrel domains. (F) Bms1 in the same orientation as EF-Tu in panel E. The  
947 unstructured loop of domain V that connects it to domain IV (denoted by the black arrow) and  
948 an N-terminal helix of Mpp10 (red) contacts domains II and III of Bms1 in a manner reminiscent  
949 of how tRNA interacts with GDPNP-bound EF-Tu. The mutated residues that suppress *bud23Δ* are  
950 shown as magenta sticks.

951

952 **Figure S5. Proteomic compositions of 40S pre-cursors from cells with or without Bud23.** Related  
953 to Figure 7. A heatmap of SSU biogenesis proteins that co-immunoprecipitated with Enp1-TAP in  
954 the presence (+) or absence (-) of Bud23 is shown. The scale spanning from 0 (white) to 1 (cyan)  
955 reflects the relative spectral abundance factor (RSAF). The RSAF was calculated by first  
956 normalizing the total number of spectral counts identified for a given protein to its molecular  
957 weight; these values were further normalized to the bait, Enp1, to reflect stoichiometry. RSAF  
958 values for each protein are shown within each cell. For each protein, the number of spectral  
959 counts identified in the presence or absence of Bud23 are shown in parentheses, respectively.  
960 Proteins that showed a significant increase or decrease relative to the + Bud23 sample and are  
961 listed in Fig. S6 are denoted by an asterisks (\*) colored blue or black, respectively. Proteins are  
962 grouped according to (Zhang et al., 2016) or by known function. Heatmaps were generated in

963 Graphpad Prism version 8.3.0 (328) for Mac iOS. The complete data for this figure are available  
964 in Supplemental File 1.

965  
966 **Figure S6. 40S biogenesis factors whose association with 40S pre-cursors significantly changed**  
967 **upon Bud23-depletion.** Related to Figures 7 and S5. Mass spectrometry analysis of total proteins  
968 that co-precipitated with Enp1. Proteins that showed a significant log<sub>2</sub> fold-change difference in  
969 the absence or presence of Bud23 are shown. Total number of peptides identified for each  
970 protein was normalized to molecular weight then further normalized to the bait to generate RSAF  
971 values (see Methods) which were used to calculate the log<sub>2</sub> fold-change between the mutant  
972 and wild-type samples. Proteins displaying a  $\pm$  0.5-fold change or more with a difference of  
973 greater than 10 total spectral counts are plotted. Proteins are grouped according to when they  
974 first bind to pre-ribosomes (Zhang et al., 2016). The complete mass spectrometry data are  
975 available in Supplemental File 1.

976

## 977 Tables

978 **Table 1: Yeast strains used in this study.**

| Strain  | Genotype                                                                | Reference                     |
|---------|-------------------------------------------------------------------------|-------------------------------|
| AJY2665 | <i>MATa his3Δ1 leu2Δ0 met15Δ0ura3Δ0 ENP1-TAP::HIS3MX6</i>               | (Ghaemmaghami et al., 2003)   |
| AJY2161 | <i>MATa his3Δ1 leu2Δ0 ura3Δ0 lys2Δ0 met15Δ0 bud23Δ::KanMX</i>           | (White et al., 2008)          |
| AJY2676 | <i>MATa his3Δ1 leu2Δ0 ura3Δ0 lys2Δ0 met15Δ0 bud23Δ::CloNAT</i>          | This study & (Sardana, 2013). |
| AJY3156 | <i>MATa his3Δ1 leu2Δ0 met15Δ0ura3Δ0 ENP1-TAP::HIS3MX6 bud23Δ::KanMX</i> | This study.                   |
| AJY3581 | <i>MATa his3Δ1 leu2Δ0 ura3Δ0 lys2Δ0 met15Δ0 bud23Δ::KanMX</i>           | (Sardana et al.,              |

|         | <i>utp2-A2D</i>                                                            | 2013)                         |
|---------|----------------------------------------------------------------------------|-------------------------------|
| AJY3512 | <i>MATa his3Δ1 leu2Δ0 ura3Δ0 lys2Δ0 met15Δ0 bud23Δ::KanMX imp4-V170F</i>   | This study & (Sardana, 2013). |
| AJY3579 | <i>MATa his3Δ1 leu2Δ0 ura3Δ0 lys2Δ0 met15Δ0 bud23Δ::KanMX imp4-R94L</i>    | This study & (Sardana, 2013). |
| AJY3580 | <i>MATa his3Δ1 leu2Δ0 ura3Δ0 lys2Δ0 met15Δ0 bud23Δ::KanMX imp4-N118K</i>   | This study & (Sardana, 2013). |
| AJY3741 | <i>MATa his3Δ1 leu2Δ0 ura3Δ0 lys2Δ0 met15Δ0 bud23Δ::KanMX imp4-T92I</i>    | This study & (Sardana, 2013). |
| AJY3742 | <i>MATa his3Δ1 leu2Δ0 ura3Δ0 lys2Δ0 met15Δ0 bud23Δ::KanMX imp4-R116M</i>   | This study & (Sardana, 2013). |
| AJY3743 | <i>MATa his3Δ1 leu2Δ0 ura3Δ0 lys2Δ0 met15Δ0 bud23Δ::KanMX imp4-S93T</i>    | This study & (Sardana, 2013). |
| AJY3744 | <i>MATa his3Δ1 leu2Δ0 ura3Δ0 lys2Δ0 met15Δ0 bud23Δ::KanMX imp4-R94S</i>    | This study & (Sardana, 2013). |
| AJY3745 | <i>MATa his3Δ1 leu2Δ0 ura3Δ0 lys2Δ0 met15Δ0 bud23Δ::KanMX imp4-N118D</i>   | This study & (Sardana, 2013). |
| AJY4501 | <i>MATa his3Δ1 leu2Δ0 ura3Δ0 lys2Δ0 met15Δ0 bud23Δ::CloNAT imp4-H159R</i>  | This study.                   |
| AJY4502 | <i>MATa his3Δ1 leu2Δ0 ura3Δ0 lys2Δ0 met15Δ0 bud23Δ::CloNAT utp2-L9S</i>    | This study.                   |
| AJY4503 | <i>MATa his3Δ1 leu2Δ0 ura3Δ0 lys2Δ0 met15Δ0 bud23Δ::CloNAT utp14-W794L</i> | This study.                   |
| AJY4504 | <i>MATa his3Δ1 leu2Δ0 ura3Δ0 lys2Δ0 met15Δ0 bud23Δ::CloNAT imp4-R99L</i>   | This study.                   |
| AJY4505 | <i>MATa his3Δ1 leu2Δ0 ura3Δ0 lys2Δ0 met15Δ0 bud23Δ::CloNAT imp4-N121I</i>  | This study.                   |
| AJY4506 | <i>MATa his3Δ1 leu2Δ0 ura3Δ0 lys2Δ0 met15Δ0 bud23Δ::CloNAT imp4-Y77C</i>   | This study.                   |
| AJY4507 | <i>MATa his3Δ1 leu2Δ0 ura3Δ0 lys2Δ0 met15Δ0 bud23Δ::CloNAT imp4-S101W</i>  | This study.                   |
| AJY4508 | <i>MATa his3Δ1 leu2Δ0 ura3Δ0 lys2Δ0 met15Δ0 bud23Δ::CloNAT imp4-H208D</i>  | This study.                   |
| AJY4509 | <i>MATa his3Δ1 leu2Δ0 ura3Δ0 lys2Δ0 met15Δ0 bud23Δ::CloNAT imp4-R94C</i>   | This study.                   |
| AJY4510 | <i>MATa his3Δ1 leu2Δ0 ura3Δ0 lys2Δ0 met15Δ0 bud23Δ::CloNAT</i>             | This study.                   |

|         | <i>imp4-H156D</i>                                                          |             |
|---------|----------------------------------------------------------------------------|-------------|
| AJY4511 | <i>MATa his3Δ1 leu2Δ0 ura3Δ0 lys2Δ0 met15Δ0 bud23Δ::CloNAT imp4-R99H</i>   | This study. |
| AJY4512 | <i>MATa his3Δ1 leu2Δ0 ura3Δ0 lys2Δ0 met15Δ0 bud23Δ::CloNAT imp4-R146G</i>  | This study. |
| AJY4513 | <i>MATa his3Δ1 leu2Δ0 ura3Δ0 lys2Δ0 met15Δ0 bud23Δ::CloNAT W791L</i>       | This study. |
| AJY4514 | <i>MATa his3Δ1 leu2Δ0 ura3Δ0 lys2Δ0 met15Δ0 bud23Δ::CloNAT dhr1-D408Y</i>  | This study. |
| AJY4515 | <i>MATa his3Δ1 leu2Δ0 ura3Δ0 lys2Δ0 met15Δ0 bud23Δ::CloNAT dhr1-G432R</i>  | This study. |
| AJY4516 | <i>MATa his3Δ1 leu2Δ0 ura3Δ0 lys2Δ0 met15Δ0 bud23Δ::CloNAT dhr1-S511Y</i>  | This study. |
| AJY4517 | <i>MATa his3Δ1 leu2Δ0 ura3Δ0 lys2Δ0 met15Δ0 bud23Δ::CloNAT dhr1-G434D</i>  | This study. |
| AJY4518 | <i>MATa his3Δ1 leu2Δ0 ura3Δ0 lys2Δ0 met15Δ0 bud23Δ::CloNAT dhr1-E397D</i>  | This study. |
| AJY4519 | <i>MATa his3Δ1 leu2Δ0 ura3Δ0 lys2Δ0 met15Δ0 bud23Δ::CloNAT dhr1-R596G</i>  | This study. |
| AJY4520 | <i>MATa his3Δ1 leu2Δ0 ura3Δ0 lys2Δ0 met15Δ0 bud23Δ::CloNAT dhr1-D566Y</i>  | This study. |
| AJY4521 | <i>MATa his3Δ1 leu2Δ0 ura3Δ0 lys2Δ0 met15Δ0 bud23Δ::CloNAT dhr1-A804D</i>  | This study. |
| AJY4522 | <i>MATa his3Δ1 leu2Δ0 ura3Δ0 lys2Δ0 met15Δ0 bud23Δ::CloNAT dhr1-R596S</i>  | This study. |
| AJY4523 | <i>MATa his3Δ1 leu2Δ0 ura3Δ0 lys2Δ0 met15Δ0 bud23Δ::CloNAT dhr1-M857I</i>  | This study. |
| AJY4524 | <i>MATa his3Δ1 leu2Δ0 ura3Δ0 lys2Δ0 met15Δ0 bud23Δ::CloNAT dhr1-R563M</i>  | This study. |
| AJY4525 | <i>MATa his3Δ1 leu2Δ0 ura3Δ0 lys2Δ0 met15Δ0 bud23Δ::CloNAT dhr1-R13G</i>   | This study. |
| AJY4526 | <i>MATa his3Δ1 leu2Δ0 ura3Δ0 lys2Δ0 met15Δ0 bud23Δ::CloNAT dhr1-E1037Q</i> | This study. |
| AJY4527 | <i>MATa his3Δ1 leu2Δ0 ura3Δ0 lys2Δ0 met15Δ0 bud23Δ::CloNAT dhr1-E1037K</i> | This study. |
| AJY4529 | <i>MATa his3Δ1 leu2Δ0 ura3Δ0 lys2Δ0 met15Δ0 bud23Δ::CloNAT</i>             | This study. |

|             |                                                                                                             |                      |
|-------------|-------------------------------------------------------------------------------------------------------------|----------------------|
|             | <i>bms1-D843V</i>                                                                                           |                      |
| AJY4530     | <i>MATa his3Δ1 leu2Δ0 ura3Δ0 lys2Δ0 met15Δ0 bud23Δ::CloNAT dhr1-F594L</i>                                   | This study.          |
| AJY4531     | <i>MATa his3Δ1 leu2Δ0 ura3Δ0 lys2Δ0 met15Δ0 bud23Δ::CloNAT rps28a-G24D</i>                                  | This study.          |
| AJY4532     | <i>MATa his3Δ1 leu2Δ0 ura3Δ0 lys2Δ0 met15Δ0 bud23Δ::CloNAT bms1-D124Y</i>                                   | This study.          |
| AJY4533     | <i>MATa his3Δ1 leu2Δ0 ura3Δ0 lys2Δ0 met15Δ0 bud23Δ::CloNAT bms1-A903P</i>                                   | This study.          |
| AJY4535     | <i>MATa his3Δ1 leu2Δ0 ura3Δ0 lys2Δ0 met15Δ0 bud23Δ::CloNAT bms1-G813S</i>                                   | This study.          |
| AJY4536     | <i>MATa his3Δ1 leu2Δ0 ura3Δ0 lys2Δ0 met15Δ0 bud23Δ::CloNAT imp4-P252L</i>                                   | This study.          |
| AJY4537     | <i>MATa his3Δ1 leu2Δ0 ura3Δ0 lys2Δ0 met15Δ0 bud23Δ::CloNAT bms1-S1020L</i>                                  | This study.          |
| AJY4395     | <i>MATa his3Δ1 leu2Δ0 met15Δ0 ura3Δ0 ENP1-TAP::HIS3MX6 BUD23-AID-HA::OsTIR1::LEU2</i>                       | This study.          |
| BY4741      | <i>MATa his3Δ1 leu2Δ0 met15Δ0 ura3Δ0</i>                                                                    | Open Biosystems      |
| PJ69-4a     | <i>MATa trp1-901 leu2-3,112 ura3-52 his3-200 gal4Δ gal80Δ LYS2::GAL1-HIS3 GAL2-ADE2 met2::GAL7-lacZ</i>     | (James et al., 1996) |
| PJ69-4alpha | <i>MATalpha trp1-901 leu2-3,112 ura3-52 his3-200 gal4Δ gal80Δ LYS2::GAL1-HIS3 GAL2-ADE2 met2::GAL7-lacZ</i> | (James et al., 1996) |

979

980 **Table 2: Plasmids used in this study.**

| Plasmid | Description                      | Reference              |
|---------|----------------------------------|------------------------|
| pAJ2321 | <i>GAL4AD-HA-UTP14 LEU2 2μ</i>   | (Zhu et al., 2016)     |
| pAJ2595 | <i>UTP2 URA3 CEN ARS</i>         | (Sardana et al., 2013) |
| pAJ2596 | <i>utp2-A2D URA3 CEN ARS</i>     | (Sardana et al., 2013) |
| pAJ2922 | <i>GAL4BD-c-myc-DHR1 TRP1 2μ</i> | (Sardana et al., 2014) |
| pAJ2769 | <i>GAL4BD-c-myc-IMP4 TRP1 2μ</i> | This study.            |
| pAJ3332 | <i>utp2-F149S URA3 CEN ARS</i>   | This study.            |



|         |                                                                            |                             |
|---------|----------------------------------------------------------------------------|-----------------------------|
| pAJ3335 | <i>utp2-L151H URA3 CEN ARS</i>                                             | This study.                 |
| pAJ3347 | <i>utp2-L148S, F149S, L151H URA3 CEN ARS</i>                               | This study.                 |
| pAJ3348 | <i>utp2-L6P URA3 CEN ARS</i>                                               | This study.                 |
| pAJ3349 | <i>utp2-K7E URA3 CEN ARS</i>                                               | This study.                 |
| pAJ3350 | <i>utp2-L148S URA3 CEN ARS</i>                                             | This study.                 |
| pAJ4093 | <i>utp2-F58S URA3 CEN ARS</i>                                              | This study.                 |
| pAJ4094 | <i>PGAL10-UTP2 LEU2 CEN ARS</i>                                            | This study.                 |
| pAJ4095 | <i>utp2-A2D, L6P, K7E URA3 CEN ARS</i>                                     | This study.                 |
| pAJ4188 | <i>Utp2-GAL4AD-HA LEU2 2<math>\mu</math></i>                               | This study.                 |
| pAJ4192 | <i>utp2-F58S-GAL4AD-HA LEU2 2<math>\mu</math></i>                          | This study.                 |
| pAJ4193 | <i>utp2-L148S, F149S, L151H-GAL4AD-HA LEU2 2<math>\mu</math></i>           | This study.                 |
| pAJ4194 | <i>utp2-A2D, L6P, K7E-GAL4AD-HA LEU2 2<math>\mu</math></i>                 | This study.                 |
| pAJ4493 | <i>GAL4BD-c-myc-imp4-V170F TRP1 2<math>\mu</math></i>                      | This study.                 |
| pAJ4494 | <i>GAL4BD-c-myc-imp4-P252L TRP1 2<math>\mu</math></i>                      | This study.                 |
| pAJ4503 | <i>GAL4BD-c-myc-DHR1-E360K, E397D, E402G, D408Y TRP1 2<math>\mu</math></i> | This study.                 |
| pAJ4513 | <i>GAL4BD-c-myc-DHR1-R563M, D566Y, E831K, F837L TRP1 2<math>\mu</math></i> | This study.                 |
| pAJ4514 | <i>GAL4BD-c-myc-DHR1-H593Y, R596C, E831K TRP1 2<math>\mu</math></i>        | This study.                 |
| pGADT7  | <i>GAL4AD-HA LEU2 2<math>\mu</math></i>                                    | (Patel et al., 2007)        |
| pGBKT7  | <i>GAL4BD-c-myc TRP1 2<math>\mu</math></i>                                 | (Patel et al., 2007)        |
| pJW1662 | <i>AtIAA17_71-114(AID*)-HA::LEU2 prADH1-OsTIR1</i>                         | (Costa et al., 2018)        |
| pRS416  | <i>URA3 CEN ARS</i>                                                        | (Sikorski and Hieter, 1989) |

982 **Table 3: Oligonucleotide probes used for Northern blotting.**

| Target    | Sequence                     |
|-----------|------------------------------|
| +1-A0     | 5' GGTCTCTCTGCTGCCGAAATG 3'  |
| A0-A1     | 5' CCCACCTATCCCTCTTGC 3'     |
| A2-A3     | 5' TGTTACCTCTGGGCCCCGATTG 3' |
| U3 snoRNA | 5' TAGATTCAATTTGGTTTCTC 3'   |

983

984 **Supporting information**

985 Supplemental File 1 - Mass spectrometry data for Enp1-TAP affinity purifications.

986 **Acknowledgments**

987 This work was supported by National Institutes of Health grants GM127127, GM053655,  
988 and GM108823 to AWJ, a fellowship from the University of Texas at Austin Graduate School to  
989 JJB, and a fellowship from the University of Texas at Austin Office of Undergraduate Research to  
990 EWE.

991 We thank S. Baserga and C. Wang for the Imp4 and Bud23 antibodies, respectively. The  
992 vector pJW1662 was a gift from J. Weissman (Addgene plasmid #112050). We thank J. Ream and  
993 J. Zhu for assistance with cloning, and P. Sujita for assistance with preparing samples for Illumina  
994 sequencing submission. We also thank the members of the A. Johnson and Sarinay-Cenik  
995 laboratories for helpful comments regarding the manuscript.

996

## 997 **Author contributions**

998 JJB and AWJ conceptualized, analyzed and interpreted data, and wrote the manuscript.

999 JJB performed experiments and bioinformatic analyses. JJB, RS, EWE, and AWJ isolated and  
1000 identified the suppressors of *bud23Δ*.

## 1001 **References**

- 1002 Ameismeier M, Cheng J, Berninghausen O, Beckmann R. 2018. Visualizing late states of human  
1003 40S ribosomal subunit maturation. *Nature* **558**:249–253. doi:10.1038/s41586-018-0193-0  
1004 Barandun J, Chaker-Margot M, Hunziker M, Molloy KR, Chait BT, Klinge S. 2017. The complete  
1005 structure of the small-subunit processome. *Nat Struct Mol Biol* **1**–36.  
1006 doi:10.1038/nsmb.3472  
1007 Barandun J, Hunziker M, Klinge S. 2018. Assembly and structure of the SSU processome—a  
1008 nucleolar precursor of the small ribosomal subunit. *Curr Opin Struct Biol* **49**:85–93.  
1009 doi:10.1016/j.sbi.2018.01.008  
1010 Baßler J, Ahmed YL, Kallas M, Kornprobst M, Calviño FR, Gnädig M, Thoms M, Stier G, Ismail S,  
1011 Kharde S, Castillo N, Griesel S, Bastuck S, Bradatsch B, Thomson E, Flemming D, Sinning I,  
1012 Hurt E. 2016. Interaction network of the ribosome assembly machinery from a eukaryotic  
1013 thermophile. *Protein Sci* **22**:1–50. doi:10.1002/pro.3085  
1014 Baßler J, Hurt E. 2019. Eukaryotic Ribosome Assembly. *Annu Rev Biochem* **88**:281–306.  
1015 doi:10.1146/annurev-biochem-013118-110817  
1016 Ben-Shem A, Garreau de Loubresse N, Melnikov S, Jenner L, Yusupova G, Yusupov M. 2011. The  
1017 structure of the eukaryotic ribosome at 3.0 Å resolution. *Science* **334**:1524–9.  
1018 doi:10.1126/science.1212642  
1019 Black JJ, Wang Z, Goering LM, Johnson AW. 2018. Utp14 interaction with the Small Subunit  
1020 Processome. *RNA* **24**:1118–1126. doi:10.1261/rna.066373.118  
1021 Boneberg FM, Brandmann T, Kobel L, van den Heuvel J, Bargsten K, Bammert L, Kutay U, Jinek  
1022 M. 2019. Molecular mechanism of the RNA helicase DHX37 and its activation by UTP14A in  
1023 ribosome biogenesis. *RNA* **25**:685–701. doi:10.1261/rna.069609.118  
1024 Chaker-Margot M. 2018. Assembly of the small ribosomal subunit in yeast: mechanism and  
1025 regulation. *RNA* **24**:881–891. doi:10.1261/rna.066985.118  
1026 Chaker-Margot M, Barandun J, Hunziker M, Klinge S. 2017. Architecture of the yeast small  
1027 subunit processome. *Science* **355**. doi:10.1126/science.aal1880  
1028 Chaker-Margot M, Hunziker M, Barandun J, Dill BD, Klinge S. 2015. Stage-specific assembly  
1029 events of the 6-MDa small-subunit processome initiate eukaryotic ribosome biogenesis.  
1030 *Nat Struct Mol Biol* **22**:920–3. doi:10.1038/nsmb.3111  
1031 Chen W, Xie Z, Yang F, Ye K. 2017. Stepwise assembly of the earliest precursors of large  
1032 ribosomal subunits in yeast. *Nucleic Acids Res* **45**:6837–6847. doi:10.1093/nar/gkx254  
1033 Cheng J, Baßler J, Fischer P, Lau B, Kellner N, Kunze R, Griesel S, Kallas M, Berninghausen O,

- 1034 Strauss D, Beckmann R, Hurt E. 2019. Thermophile 90S Pre-ribosome Structures Reveal the  
1035 Reverse Order of Co-transcriptional 18S rRNA Subdomain Integration. *Mol Cell* 1–14.  
1036 doi:10.1016/j.molcel.2019.06.032
- 1037 Cheng J, Kellner N, Berninghausen O, Hurt E, Beckmann R. 2017. 3.2-Å-resolution structure of  
1038 the 90S preribosome before A1 pre-rRNA cleavage. *Nat Struct Mol Biol* 24:954–964.  
1039 doi:10.1038/nsmb.3476
- 1040 Choudhury P, Hackert P, Memet I, Sloan KE, Bohnsack MT. 2018. The human RNA helicase  
1041 DHX37 is required for release of the U3 snoRNP from pre-ribosomal particles. *RNA Biol*  
1042 00:1–15. doi:10.1080/15476286.2018.1556149
- 1043 Colley A, Beggs JD, Tollervey D, Lafontaine DL. 2000. Dhr1p, a putative DEAH-box RNA helicase,  
1044 is associated with the box C+D snoRNP U3. *Mol Cell Biol* 20:7238–46.  
1045 doi:10.1128/mcb.20.19.7238-7246.2000
- 1046 Costa EA, Subramanian K, Nunnari J, Weissman JS. 2018. Defining the physiological role of SRP  
1047 in protein-targeting efficiency and specificity. *Science* 359:689–692.  
1048 doi:10.1126/science.aar3607
- 1049 Danecek P, Auton A, Abecasis G, Albers CA, Banks E, DePristo MA, Handsaker RE, Lunter G,  
1050 Marth GT, Sherry ST, McVean G, Durbin R, 1000 Genomes Project Analysis Group. 2011.  
1051 The variant call format and VCFtools. *Bioinformatics* 27:2156–8.  
1052 doi:10.1093/bioinformatics/btr330
- 1053 Delprato A, Al Kadri Y, Pérébaskine N, Monfoulet C, Henry Y, Henras AK, Fribourg S. 2014.  
1054 Crucial role of the Rcl1p-Bms1p interaction for yeast pre-ribosomal RNA processing.  
1055 *Nucleic Acids Res* 42:10161–72. doi:10.1093/nar/gku682
- 1056 Dragon F, Gallagher JEG, Compagnone-Post PA, Mitchell BM, Porwancher KA, Wehner KA,  
1057 Wormsley S, Settlege RE, Shabanowitz J, Osheim Y, Beyer AL, Hunt DF, Baserga SJ. 2002. A  
1058 large nucleolar U3 ribonucleoprotein required for 18S ribosomal RNA biogenesis. *Nature*  
1059 417:967–70. doi:10.1038/nature00769
- 1060 Ferreira-Cerca S, Kiburu I, Thomson E, LaRonde N, Hurt E. 2014. Dominant Rio1 kinase/ATPase  
1061 catalytic mutant induces trapping of late pre-40S biogenesis factors in 80S-like ribosomes.  
1062 *Nucleic Acids Res* 42:8635–47. doi:10.1093/nar/gku542
- 1063 Fischer U, Schäuble N, Schütz S, Altvater M, Chang Y, Faza MB, Panse VG. 2015. A non-canonical  
1064 mechanism for Crm1-export cargo complex assembly. *Elife* 4:1–20.  
1065 doi:10.7554/eLife.05745
- 1066 Gallagher JEG, Baserga SJ. 2004. Two-hybrid Mpp10p interaction-defective Imp4 proteins are  
1067 not interaction defective in vivo but do confer specific pre-rRNA processing defects in  
1068 *Saccharomyces cerevisiae*. *Nucleic Acids Res* 32:1404–13. doi:10.1093/nar/gkh318
- 1069 Gelperin D, Horton L, Beckman J, Hensold J, Lemmon SK. 2001. Bms1p, a novel GTP-binding  
1070 protein, and the related Tsr1p are required for distinct steps of 40S ribosome biogenesis in  
1071 yeast. *RNA* 7:1268–83. doi:10.1017/S1355838201013073
- 1072 Gérczei T, Correll CC. 2004. Imp3p and Imp4p mediate formation of essential U3-precursor  
1073 rRNA (pre-rRNA) duplexes, possibly to recruit the small subunit processome to the pre-  
1074 rRNA. *Proc Natl Acad Sci U S A* 101:15301–6. doi:10.1073/pnas.0406819101
- 1075 Ghaemmaghami S, Huh W-K, Bower K, Howson RW, Belle a, Dephoure N, O’Shea EK, Weissman  
1076 JS. 2003. Global analysis of protein expression in yeast. *Nature* 425:737–741.  
1077 doi:10.1038/nature02046\nnature02046 [pii]

- 1078 Hunziker M, Barandun J, Buzovetsky O, Steckler C, Molina H, Klinge S. 2019. Conformational  
1079 switches control early maturation of the eukaryotic small ribosomal subunit. *Elife* **8**:1–16.  
1080 doi:10.7554/eLife.45185
- 1081 Hunziker M, Barandun J, Petfalski E, Tan D, Delan-Forino C, Molloy KR, Kim KH, Dunn-Davies H,  
1082 Shi Y, Chaker-Margot M, Chait BT, Walz T, Tollervey D, Klinge S. 2016. UtpA and UtpB  
1083 chaperone nascent pre-ribosomal RNA and U3 snoRNA to initiate eukaryotic ribosome  
1084 assembly. *Nat Commun* **7**:12090. doi:10.1038/ncomms12090
- 1085 James P, Halladay J, Craig E a. 1996. Genomic libraries and a host strain designed for highly  
1086 efficient two-hybrid selection in yeast. *Genetics* **144**:1425–36.
- 1087 Karbstein K, Doudna JA. 2006. GTP-dependent formation of a ribonucleoprotein subcomplex  
1088 required for ribosome biogenesis. *J Mol Biol* **356**:432–43. doi:10.1016/j.jmb.2005.11.052
- 1089 Karbstein K, Jonas S, Doudna JA. 2005. An essential GTPase promotes assembly of preribosomal  
1090 RNA processing complexes. *Mol Cell* **20**:633–43. doi:10.1016/j.molcel.2005.09.017
- 1091 Klinge S, Woolford JL. 2019. Ribosome assembly coming into focus. *Nat Rev Mol Cell Biol*  
1092 **20**:116–131. doi:10.1038/s41580-018-0078-y
- 1093 Kos M, Tollervey D. 2010. Yeast pre-rRNA processing and modification occur cotranscriptionally.  
1094 *Mol Cell* **37**:809–20. doi:10.1016/j.molcel.2010.02.024
- 1095 Kressler D, Hurt E, Baßler J. 2017. A Puzzle of Life: Crafting Ribosomal Subunits. *Trends Biochem*  
1096 *Sci* **42**:640–654. doi:10.1016/j.tibs.2017.05.005
- 1097 Lackmann F, Belikov S, Burlacu E, Granneman S, Wieslander L. 2018. Maturation of the 90S pre-  
1098 ribosome requires Mrd1 dependent U3 snoRNA and 35S pre-rRNA structural  
1099 rearrangements. *Nucleic Acids Res* **46**:3692–3706. doi:10.1093/nar/gky036
- 1100 Langmead B, Salzberg SL. 2012. Fast gapped-read alignment with Bowtie 2. *Nat Methods* **9**:357–  
1101 9. doi:10.1038/nmeth.1923
- 1102 Lee SJ, Baserga SJ. 1999. Imp3p and Imp4p, two specific components of the U3 small nucleolar  
1103 ribonucleoprotein that are essential for pre-18S rRNA processing. *Mol Cell Biol* **19**:5441–  
1104 52. doi:10.1128/MCB.19.8.5441
- 1105 L etoquart J, Huvelle E, Wacheul L, Bourgeois G, Zorbas C, Graille M, Heurgu e-Hamard V,  
1106 Lafontaine DLJ. 2014. Structural and functional studies of Bud23-Trm112 reveal 18S rRNA  
1107 N7-G1575 methylation occurs on late 40S precursor ribosomes. *Proc Natl Acad Sci U S A*  
1108 **111**:E5518-26. doi:10.1073/pnas.1413089111
- 1109 Li H, Handsaker B, Wysoker A, Fennell T, Ruan J, Homer N, Marth G, Abecasis G, Durbin R, 1000  
1110 Genome Project Data Processing Subgroup. 2009. The Sequence Alignment/Map format  
1111 and SAMtools. *Bioinformatics* **25**:2078–9. doi:10.1093/bioinformatics/btp352
- 1112 Liu PC, Thiele DJ. 2001. Novel stress-responsive genes EMG1 and NOP14 encode conserved,  
1113 interacting proteins required for 40S ribosome biogenesis. *Mol Biol Cell* **12**:3644–57.  
1114 doi:10.1091/mbc.12.11.3644
- 1115 Maracci C, Rodnina M V. 2016. Review: Translational GTPases. *Biopolymers* **105**:463–75.  
1116 doi:10.1002/bip.22832
- 1117 Musalgaonkar S, Black JJ, Johnson A. 2019. The L1 stalk is required for efficient export of  
1118 nascent large ribosomal subunits in yeast. *RNA* **25**:119. doi:10.1261/rna.071811.119
- 1119 doi:10.1261/rna.071811.119
- 1120 Narasimhan V, Danecek P, Scally A, Xue Y, Tyler-Smith C, Durbin R. 2016. BCFtools/RoH: a  
1121 hidden Markov model approach for detecting autozygosity from next-generation

- 1122 sequencing data. *Bioinformatics* **32**:1749–51. doi:10.1093/bioinformatics/btw044
- 1123 Nishimura K, Fukagawa T, Takisawa H, Kakimoto T, Kanemaki M. 2009. An auxin-based degron
- 1124 system for the rapid depletion of proteins in nonplant cells. *Nat Methods* **6**:917–22.
- 1125 doi:10.1038/nmeth.1401
- 1126 Nissen P, Thirup S, Kjeldgaard M, Nyborg J. 1999. The crystal structure of Cys-tRNA<sup>Cys</sup>-EF-Tu-
- 1127 GDPNP reveals general and specific features in the ternary complex and in tRNA. *Structure*
- 1128 **7**:143–56.
- 1129 Noeske J, Wasserman MR, Terry DS, Altman RB, Blanchard SC, Cate JHD. 2015. High-resolution
- 1130 structure of the *Escherichia coli* ribosome. *Nat Struct Mol Biol* **22**:336–41.
- 1131 doi:10.1038/nsmb.2994
- 1132 Oeffinger M, Wei KE, Rogers R, DeGrasse JA, Chait BT, Aitchison JD, Rout MP. 2007.
- 1133 Comprehensive analysis of diverse ribonucleoprotein complexes. *Nat Methods* **4**:951–6.
- 1134 doi:10.1038/nmeth1101
- 1135 Patel SS, Belmont BJ, Sante JM, Rexach MF. 2007. Natively unfolded nucleoporins gate protein
- 1136 diffusion across the nuclear pore complex. *Cell* **129**:83–96. doi:10.1016/j.cell.2007.01.044
- 1137 Roychowdhury A, Joret C, Bourgeois G, Heurgué-Hamard V, Lafontaine DLJ, Graille M. 2019. The
- 1138 DEAH-box RNA helicase Dhr1 contains a remarkable carboxyl terminal domain essential for
- 1139 small ribosomal subunit biogenesis. *Nucleic Acids Res*. doi:10.1093/nar/gkz529
- 1140 Sá-Moura B, Kornprobst M, Kharde S, Ahmed YL, Stier G, Kunze R, Sinning I, Hurt E. 2017.
- 1141 Mpp10 represents a platform for the interaction of multiple factors within the 90S pre-
- 1142 ribosome. *PLoS One* **12**:e0183272. doi:10.1371/journal.pone.0183272
- 1143 Sardana R. 2013. From knobs to a central pseudoknot: understanding 40S ribosomal subunit
- 1144 biogenesis through Bud23. The University of Texas at Austin.
- 1145 Sardana R, Johnson AW. 2012. The methyltransferase adaptor protein Trm112 is involved in
- 1146 biogenesis of both ribosomal subunits. *Mol Biol Cell* **23**:4313–22. doi:10.1091/mbc.E12-05-
- 1147 0370
- 1148 Sardana R, Liu X, Granneman S, Zhu J, Gill M, Papoulas O, Marcotte EM, Tollervey D, Correll CC,
- 1149 Johnson AW. 2015. The DEAH-box helicase Dhr1 dissociates U3 from the pre-rRNA to
- 1150 promote formation of the central pseudoknot. *PLoS Biol* **13**:e1002083.
- 1151 doi:10.1371/journal.pbio.1002083
- 1152 Sardana R, White JP, Johnson AW. 2013. The rRNA methyltransferase Bud23 shows functional
- 1153 interaction with components of the SSU processome and RNase MRP. *RNA* **19**:828–40.
- 1154 doi:10.1261/rna.037671.112
- 1155 Sardana R, Zhu J, Gill M, Johnson AW. 2014. Physical and functional interaction between the
- 1156 methyltransferase Bud23 and the essential DEAH-box RNA helicase Ecm16. *Mol Cell Biol*
- 1157 **34**:2208–20. doi:10.1128/MCB.01656-13
- 1158 Schäfer T, Strauss D, Petfalski E, Tollervey D, Hurt E. 2003. The path from nucleolar 90S to
- 1159 cytoplasmic 40S pre-ribosomes. *EMBO J* **22**:1370–80. doi:10.1093/emboj/cdg121
- 1160 Sikorski RS, Hieter P. 1989. A system of shuttle vectors and yeast host strains designed for
- 1161 efficient manipulation of DNA in *Saccharomyces cerevisiae*. *Genetics* **122**:19–27.
- 1162 doi:0378111995000377 [pii]
- 1163 Sloan KE, Warda AS, Sharma S, Entian K-D, Lafontaine DLJ, Bohnsack MT. 2016. Tuning the
- 1164 ribosome: The influence of rRNA modification on eukaryotic ribosome biogenesis and
- 1165 function. *RNA Biol* **408**:1–16. doi:10.1080/15476286.2016.1259781

- 1166 Small EC, Leggett SR, Winans AA, Staley JP. 2006. The EF-G-like GTPase Snu114p regulates  
1167 spliceosome dynamics mediated by Brr2p, a DExD/H box ATPase. *Mol Cell* **23**:389–99.  
1168 doi:10.1016/j.molcel.2006.05.043
- 1169 Song H, Parsons MR, Rowsell S, Leonard G, Phillips SEV. 1999. Crystal structure of intact  
1170 elongation factor EF-Tu from *Escherichia coli* in GDP conformation at 2.05 Å resolution. *J*  
1171 *Mol Biol* **285**:1245–56. doi:10.1006/jmbi.1998.2387
- 1172 Sun Q, Zhu X, Qi J, An W, Lan P, Tan D, Chen R, Wang B, Zheng S, Zhang C, Chen X, Zhang W,  
1173 Chen J, Dong M-Q, Ye K. 2017. Molecular architecture of the 90S small subunit pre-  
1174 ribosome. *Elife* **6**:e22086. doi:10.7554/eLife.22086
- 1175 Tomecki R, Sikorski PJ, Zakrzewska-Placzek M. 2017. Comparison of preribosomal RNA  
1176 processing pathways in yeast, plant and human cells - focus on coordinated action of  
1177 endo- and exoribonucleases. *FEBS Lett* **591**:1801–1850. doi:10.1002/1873-3468.12682
- 1178 Tong AHY, Evangelista M, Parsons AB, Xu H, Bader GD, Pagé N, Robinson M, Raghizadeh S,  
1179 Hogue CWV, Bussey H, Andrews B, Tyers M, Boone C. 2001. Systematic genetic analysis  
1180 with ordered arrays of yeast deletion mutants. *Science* **294**:2364–8.  
1181 doi:10.1126/science.1065810
- 1182 Vincent NG, Charette JM, Baserga SJ. 2018. The SSU processome interactome in *Saccharomyces*  
1183 *cerevisiae* reveals novel protein subcomplexes. *RNA* **24**:77–89.  
1184 doi:10.1261/rna.062927.117
- 1185 Wegierski T, Billy E, Nasr F, Filipowicz W. 2001. Bms1p, a G-domain-containing protein,  
1186 associates with Rcl1p and is required for 18S rRNA biogenesis in yeast. *RNA* **7**:1254–67.  
1187 doi:10.1017/S1355838201012079
- 1188 Wells GR, Weichmann F, Colvin D, Sloan KE, Kudla G, Tollervey D, Watkins NJ, Schneider C.  
1189 2016. The PIN domain endonuclease Utp24 cleaves pre-ribosomal RNA at two coupled  
1190 sites in yeast and humans. *Nucleic Acids Res* gkw213. doi:10.1093/nar/gkw213
- 1191 White J, Li Z, Sardana R, Bujnicki JM, Marcotte EM, Johnson AW. 2008. Bud23 methylates  
1192 G1575 of 18S rRNA and is required for efficient nuclear export of pre-40S subunits. *Mol*  
1193 *Cell Biol* **28**:3151–61. doi:10.1128/MCB.01674-07
- 1194 Winzeler EA, Shoemaker DD, Astromoff A, Liang H, Anderson K, Andre B, Bangham R, Benito R,  
1195 Boeke JD, Bussey H, Chu AM, Connelly C, Davis K, Dietrich F, Dow SW, El Bakkoury M,  
1196 Foury F, Friend SH, Gentalen E, Giaever G, Hegemann JH, Jones T, Laub M, Liao H,  
1197 Liebundguth N, Lockhart DJ, Lucau-Danila A, Lussier M, M'Rabet N, Menard P, Mittmann  
1198 M, Pai C, Rebischung C, Revuelta JL, Riles L, Roberts CJ, Ross-MacDonald P, Scherens B,  
1199 Snyder M, Sookhai-Mahadeo S, Storms RK, Véronneau S, Voet M, Volckaert G, Ward TR,  
1200 Wysocki R, Yen GS, Yu K, Zimmermann K, Philippsen P, Johnston M, Davis RW. 1999.  
1201 Functional characterization of the *S. cerevisiae* genome by gene deletion and parallel  
1202 analysis. *Science* **285**:901–6. doi:10.1126/science.285.5429.901
- 1203 Wittinghofer A, Vetter IR. 2011. Structure-function relationships of the G domain, a canonical  
1204 switch motif. *Annu Rev Biochem* **80**:943–71. doi:10.1146/annurev-biochem-062708-  
1205 134043
- 1206 Zhang L, Wu C, Cai G, Chen S, Ye K. 2016. Stepwise and dynamic assembly of the earliest  
1207 precursors of small ribosomal subunits in yeast. *Genes Dev* **30**:718–32.  
1208 doi:10.1101/gad.274688.115
- 1209 Zhu J, Liu X, Anjos M, Correll CC, Johnson AW. 2016. Utp14 Recruits and Activates the RNA

1210 Helicase Dhr1 To Undock U3 snoRNA from the Preribosome. *Mol Cell Biol* **36**:965–78.  
1211 doi:10.1128/MCB.00773-15  
1212 Zorbas C, Nicolas E, Wacheul L, Huvelle E, Heurgué-Hamard V, Lafontaine DLJ. 2015. The human  
1213 18S rRNA base methyltransferases DIMT1L and WBSCR22-TRMT112 but not rRNA  
1214 modification are required for ribosome biogenesis. *Mol Biol Cell* **26**:2080–95.  
1215 doi:10.1091/mbc.E15-02-0073  
1216



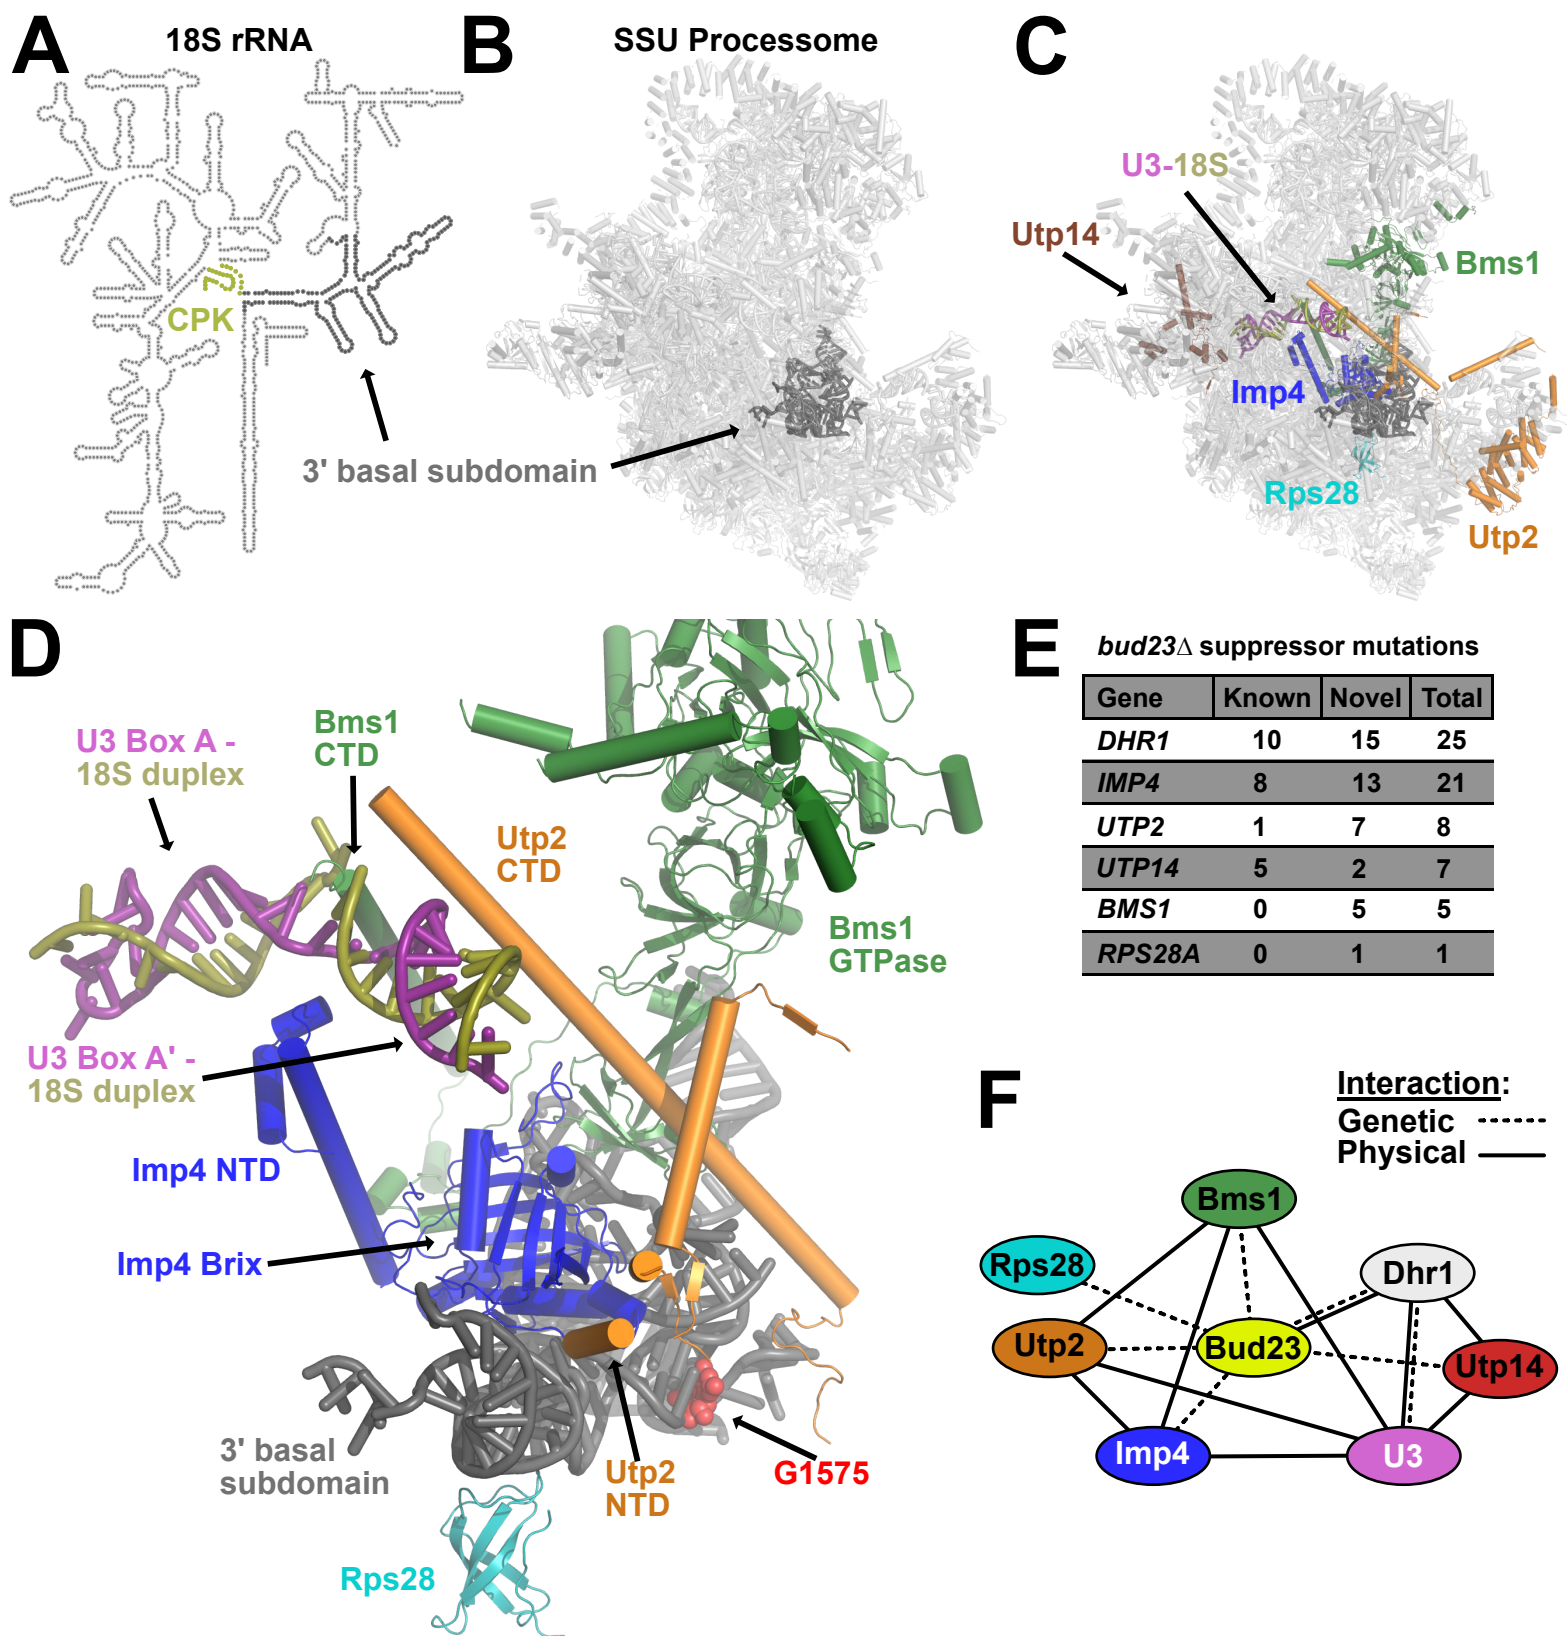

Figure 1, Black, et al 2020

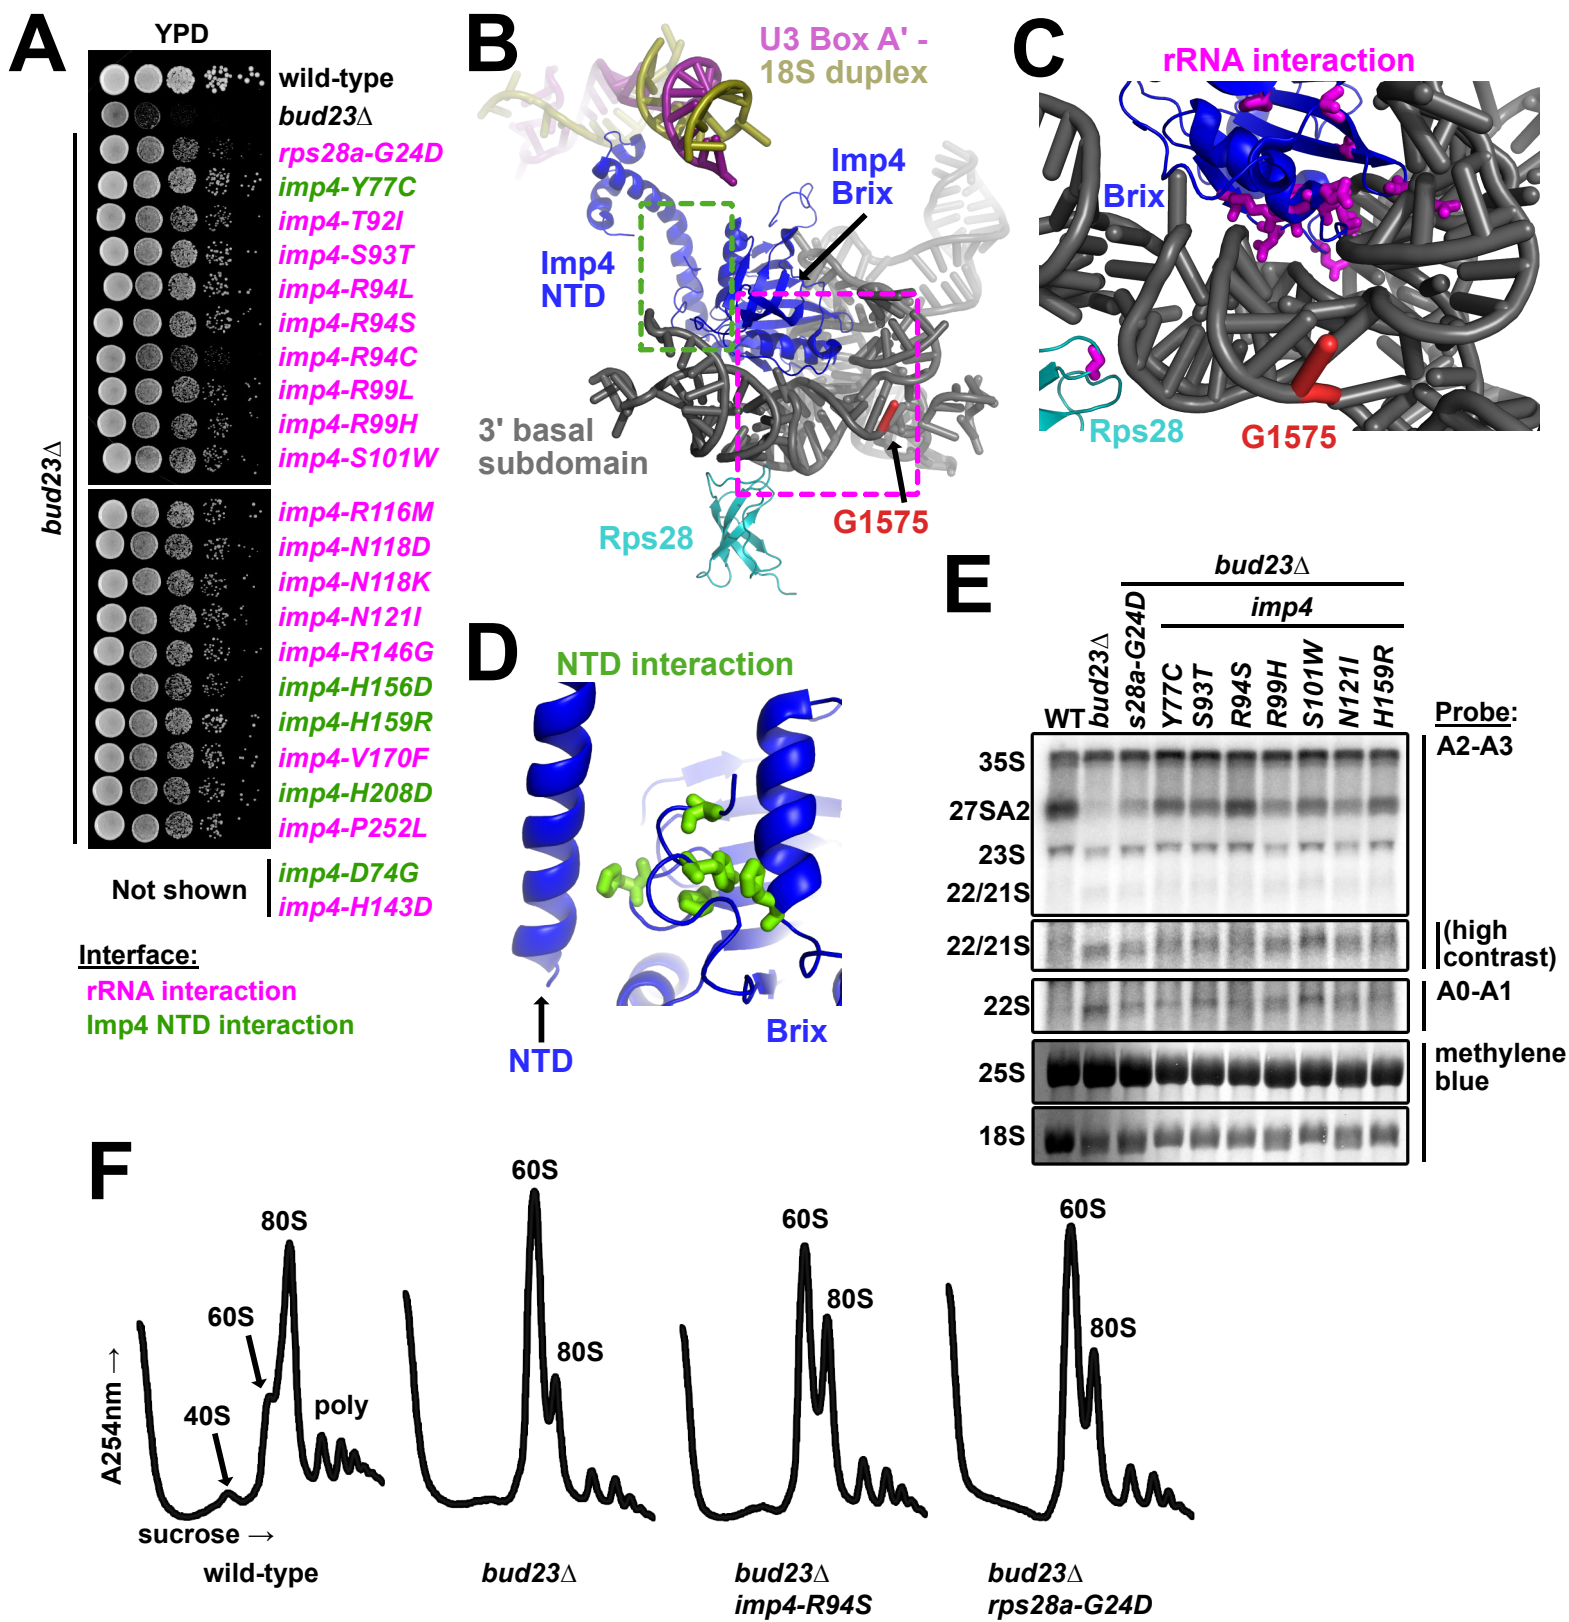

Figure 2, Black, et al 2020

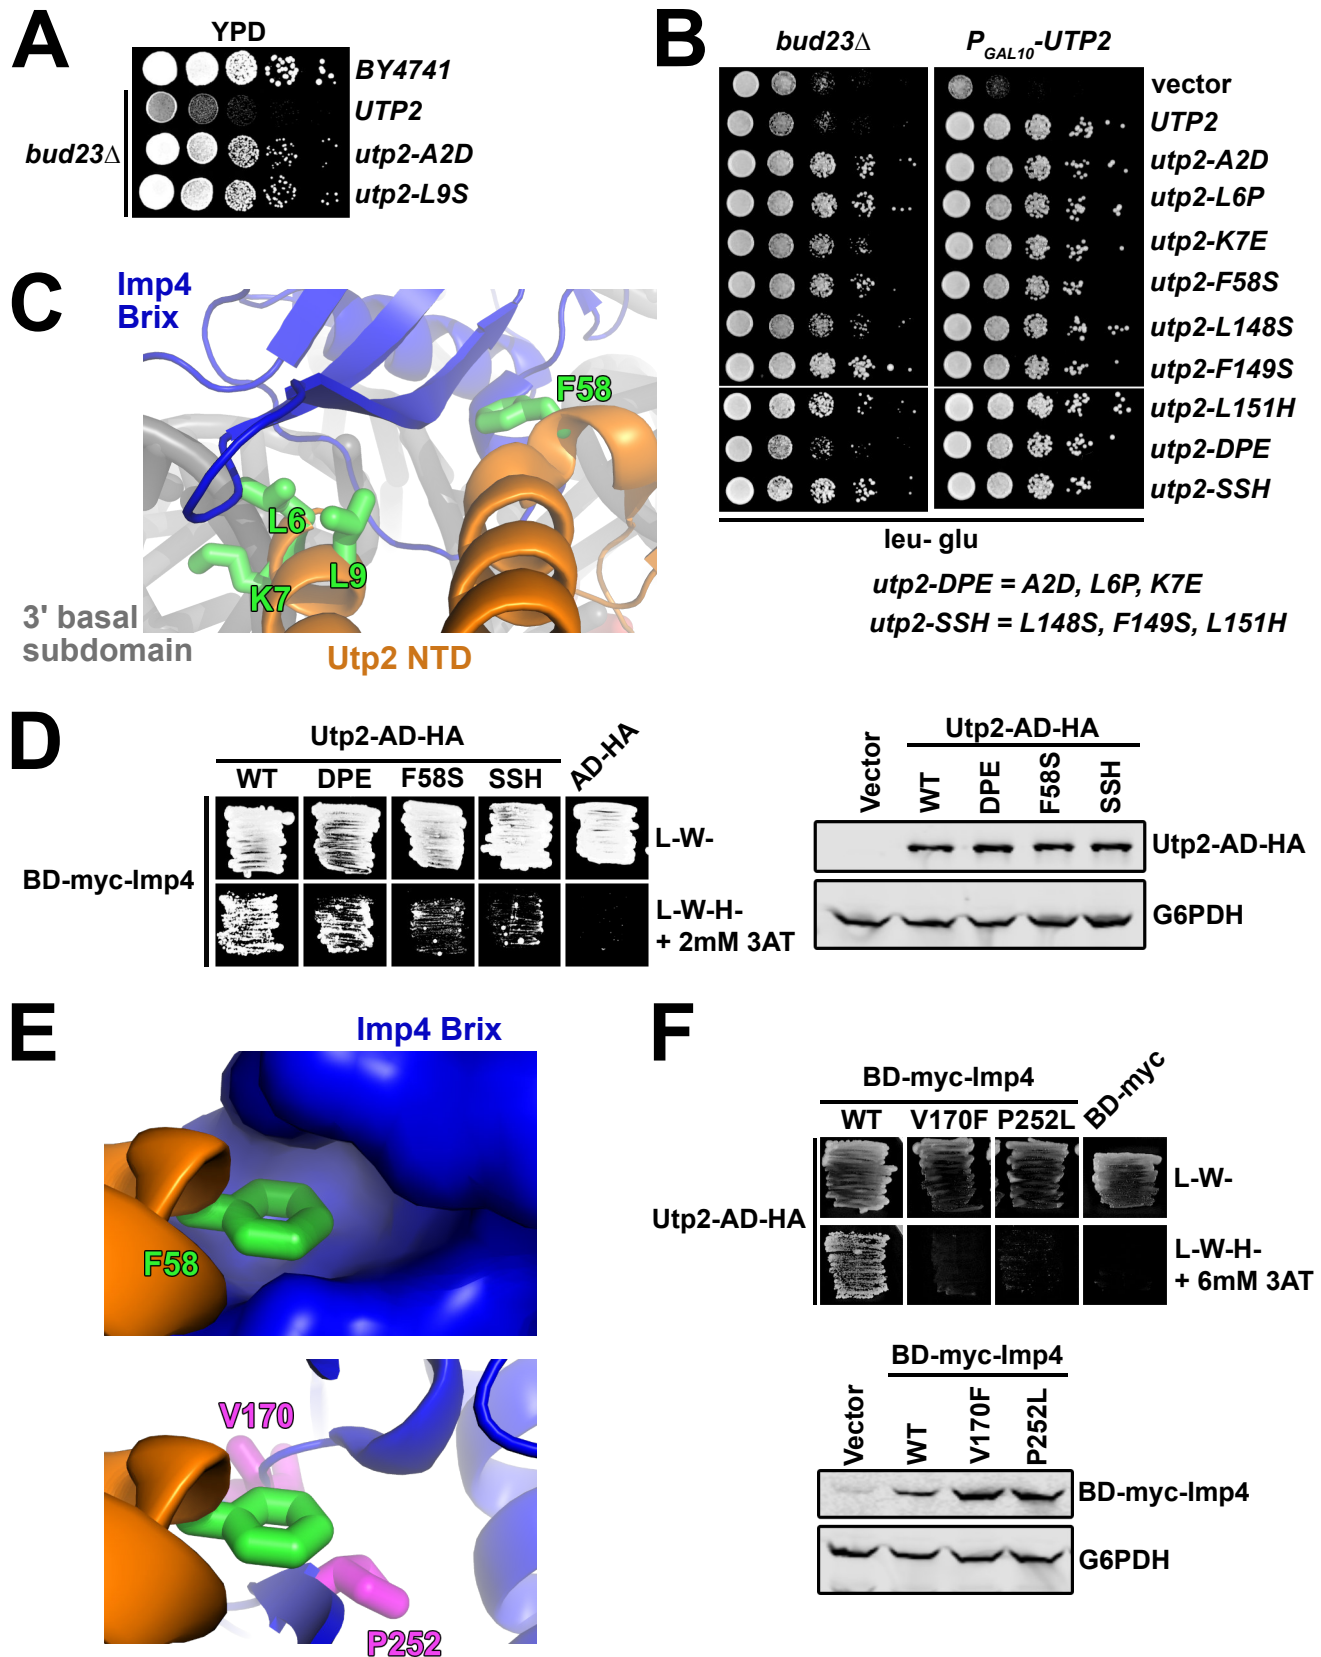

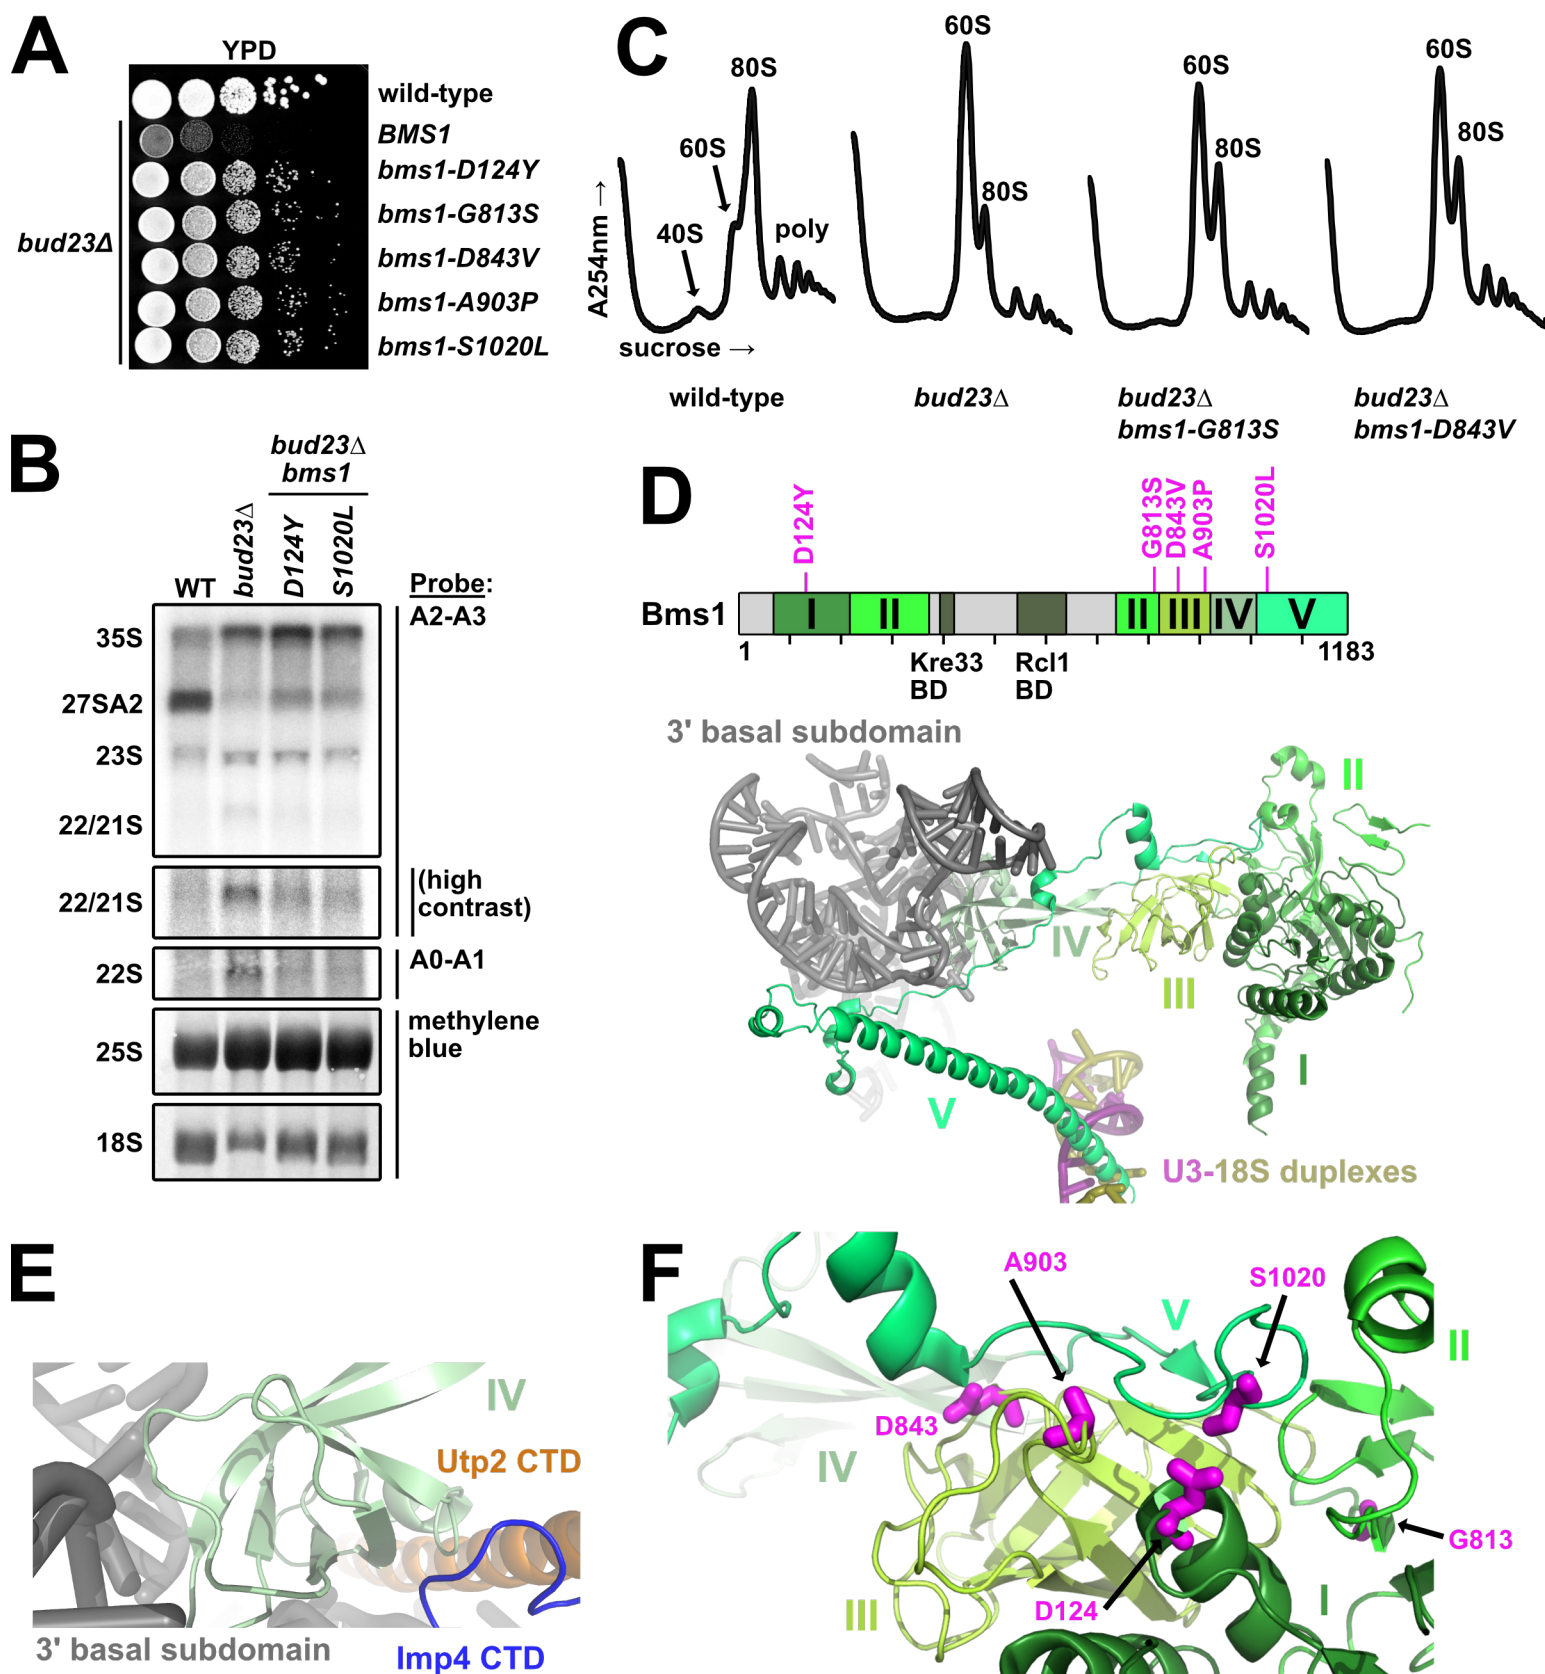

**Figure 4, Black, et al 2020**

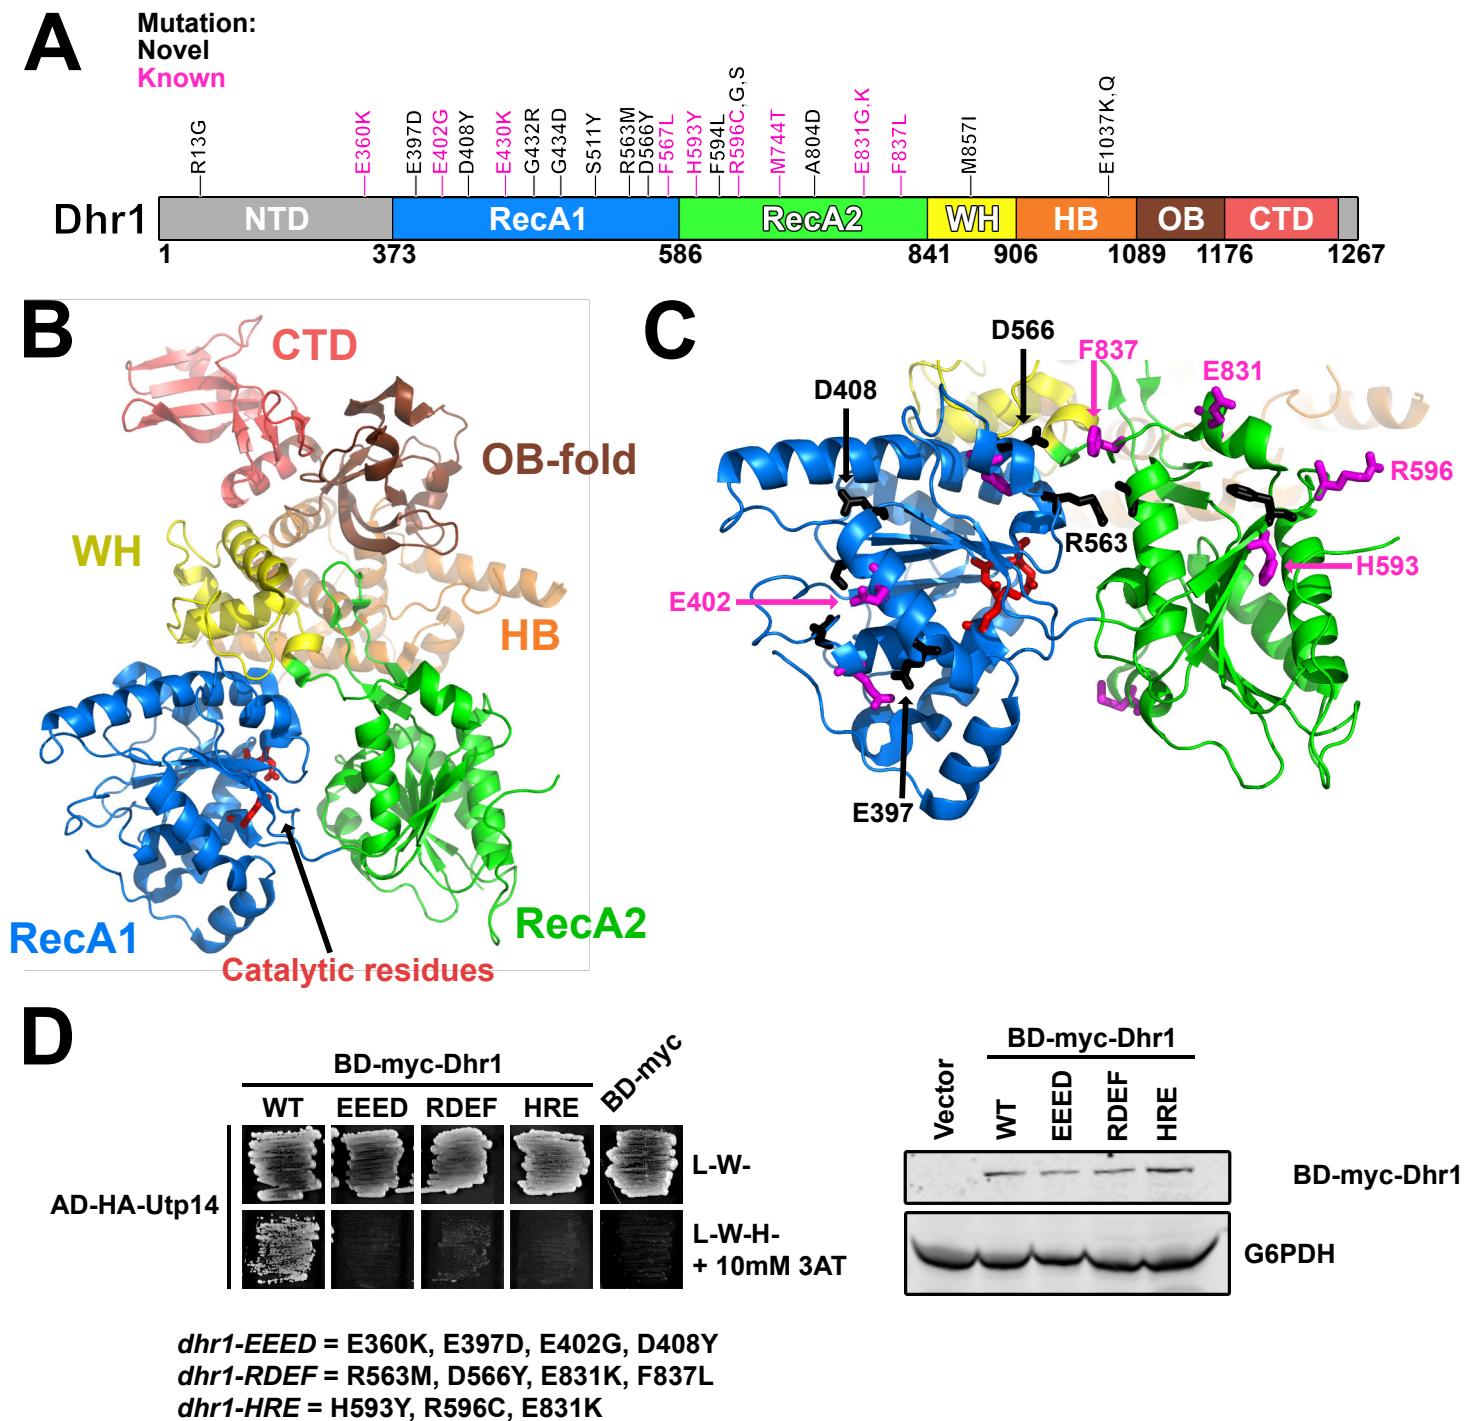

**Figure 5, Black, et al 2020**

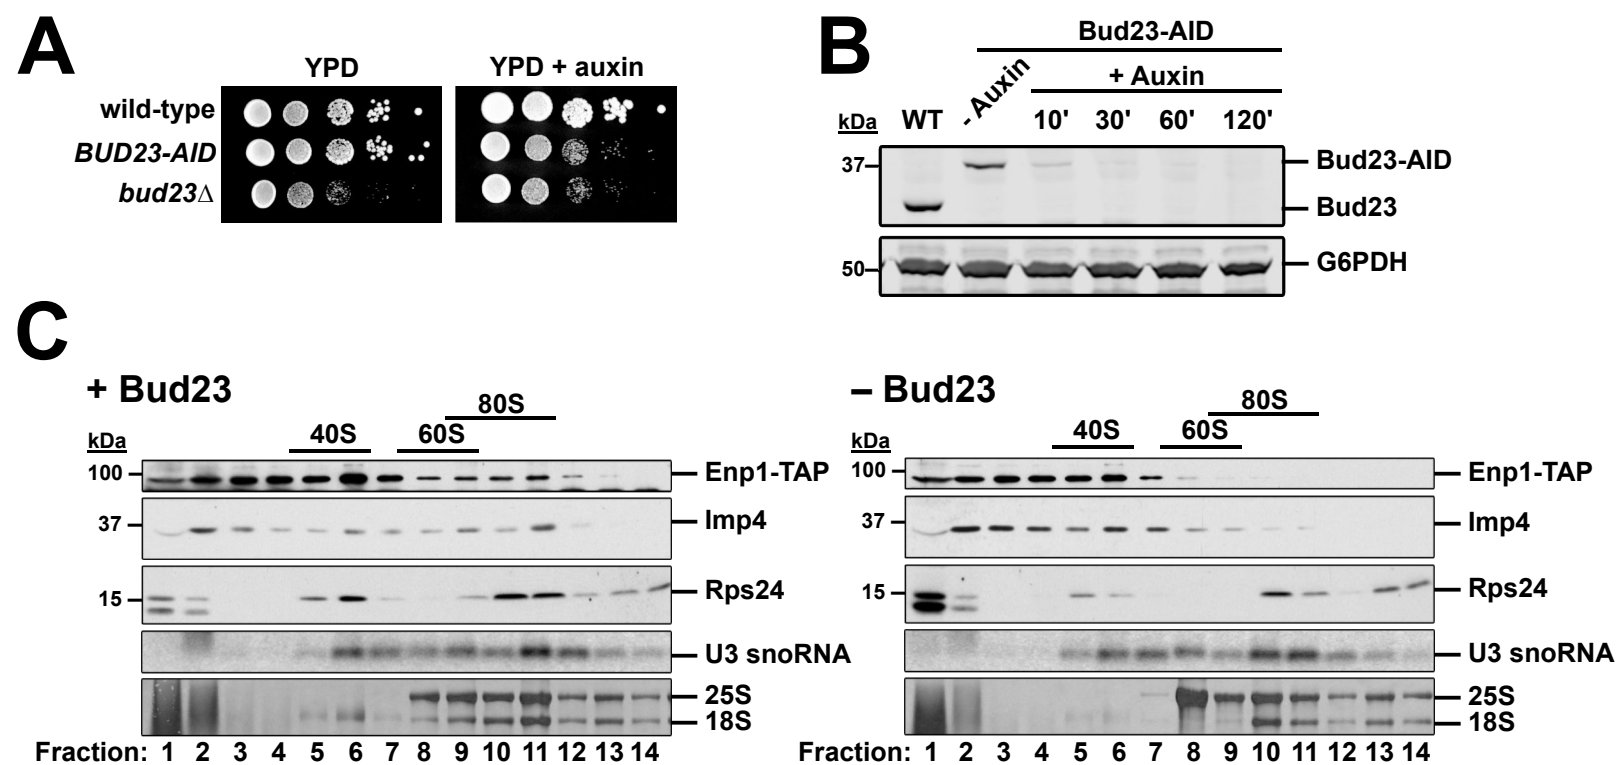

**Figure 6, Black, et al 2020**

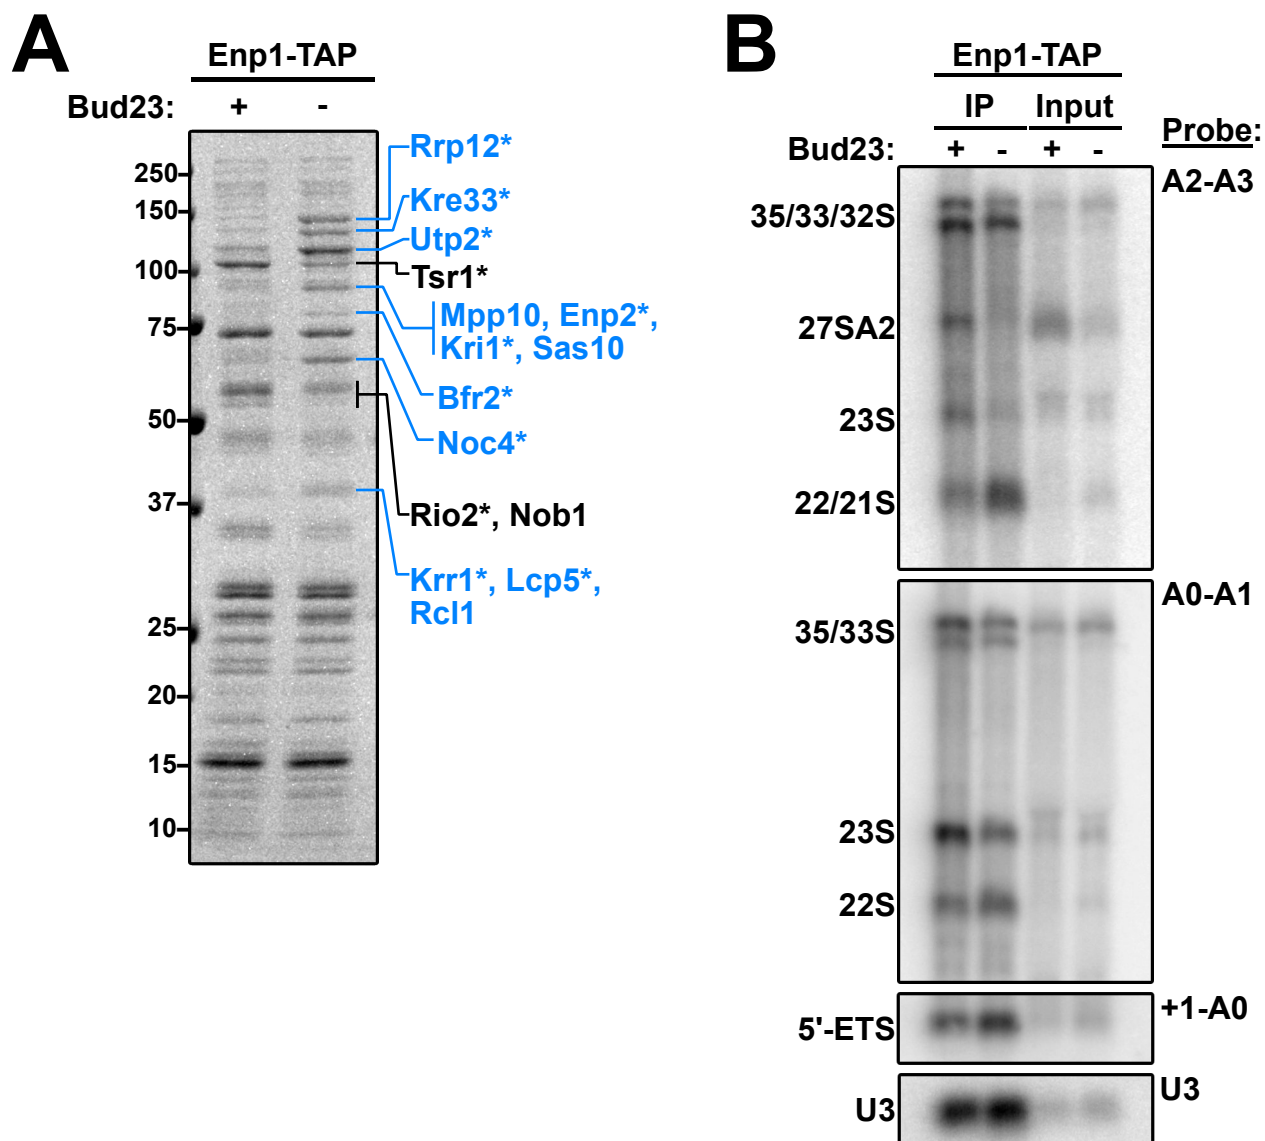

**Figure 7, Black, et al 2020**

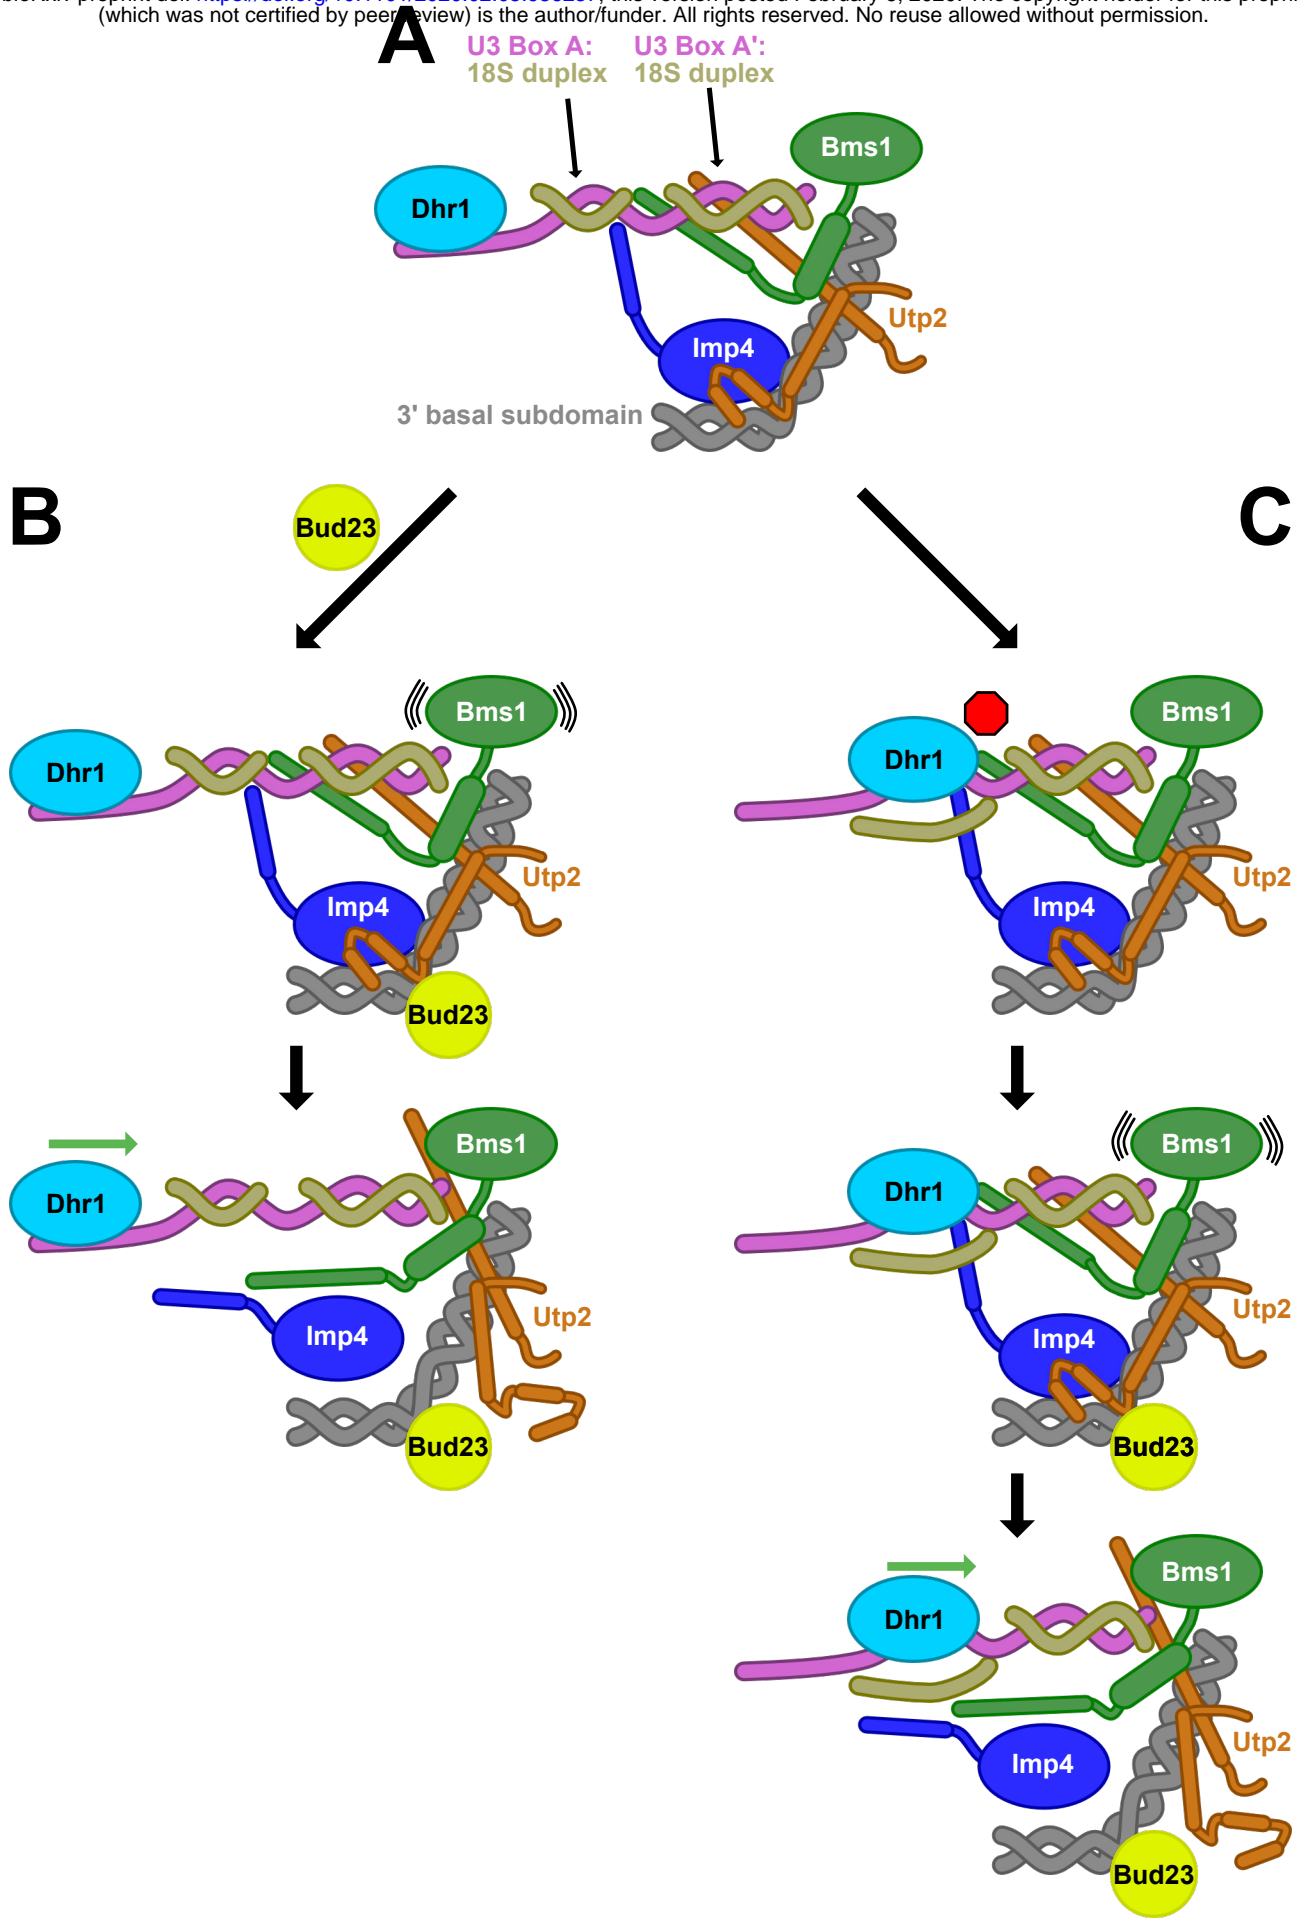

**Figure 8, Black, et al 2020**



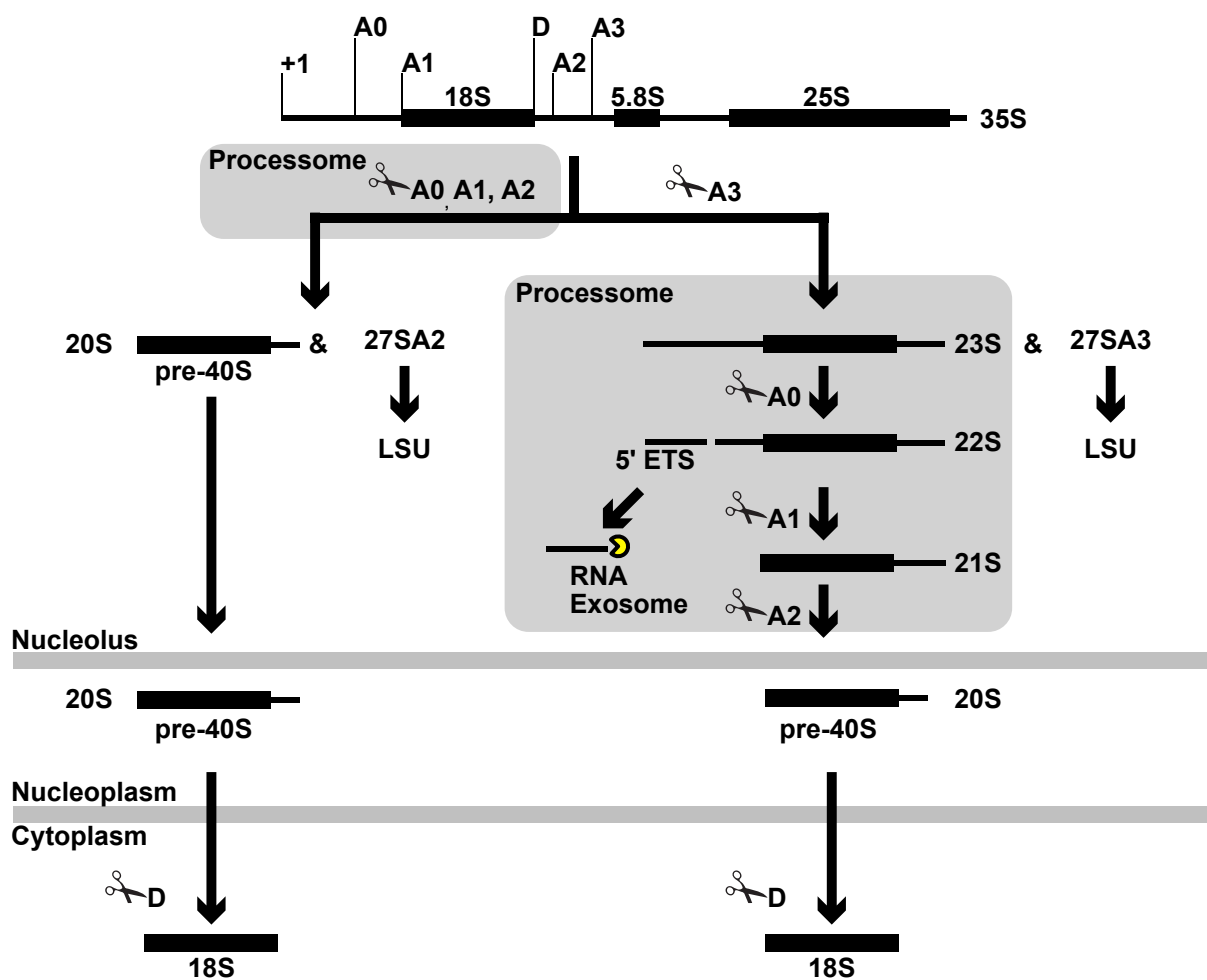

**Figure S1, Black, et al 2020**

## Central domain

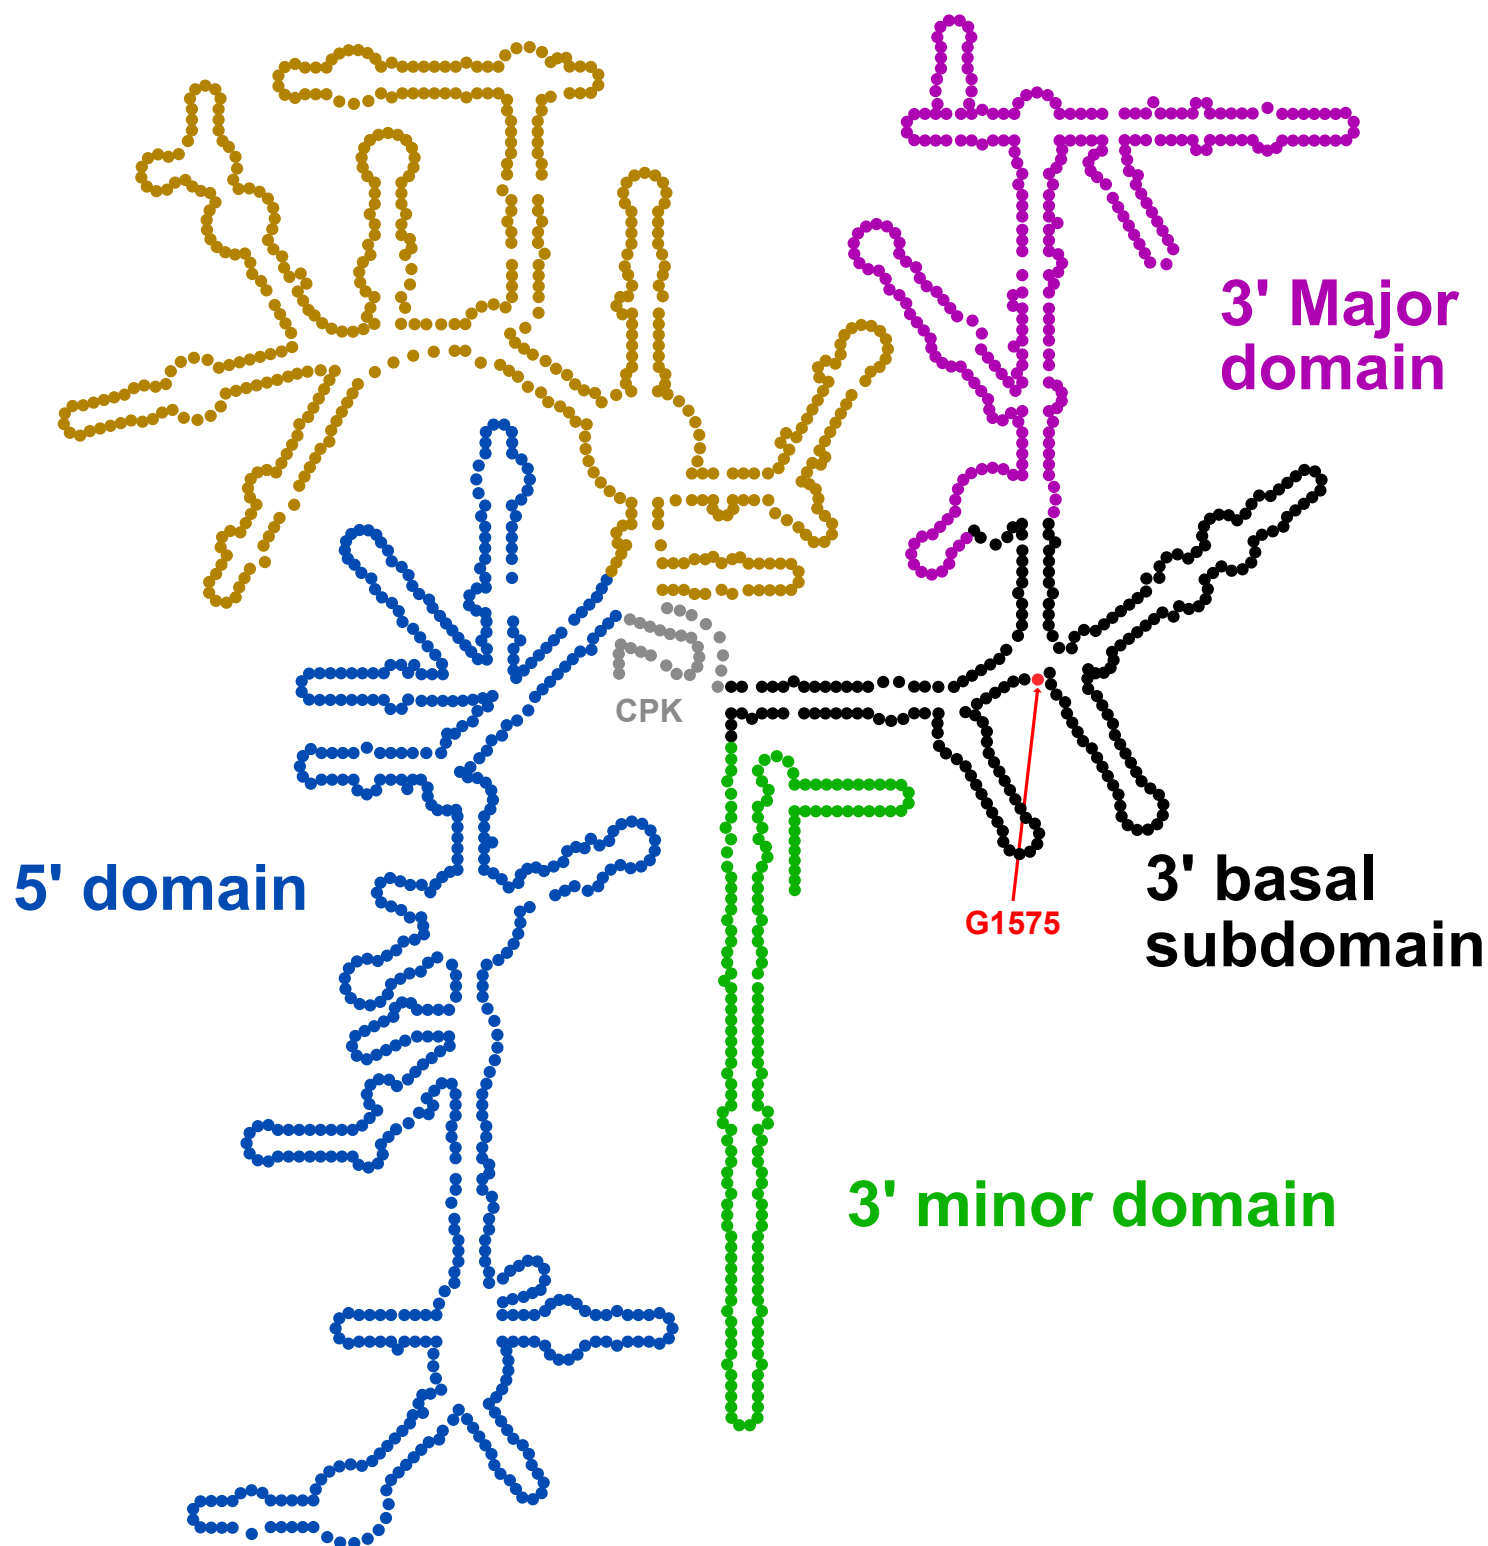

A 3D-based secondary structure, generated by RiboVision.

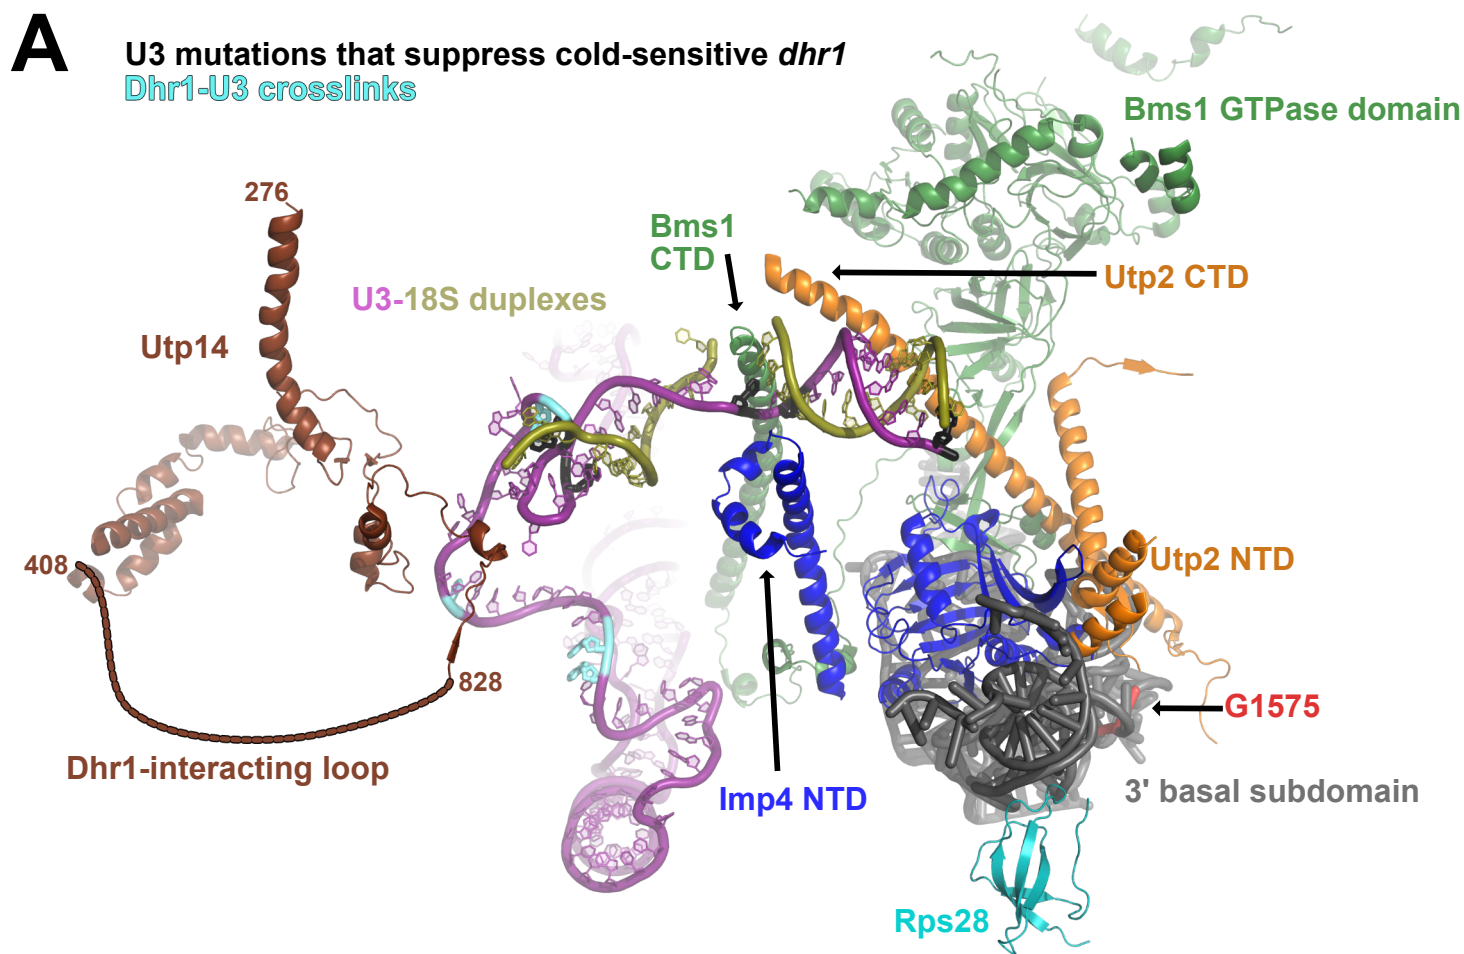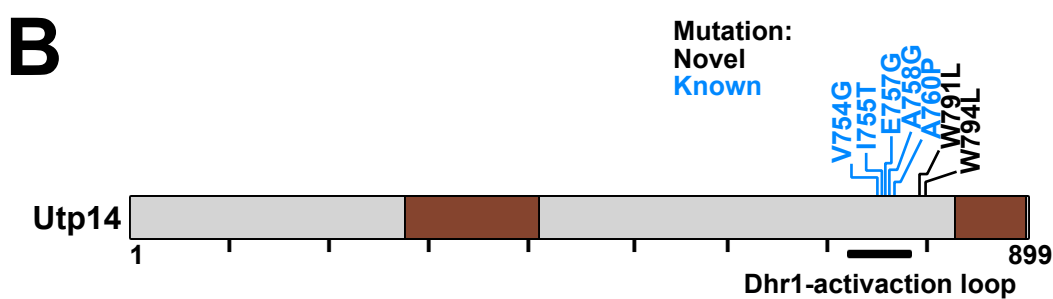

**Figure S3, Black, et al 2020**

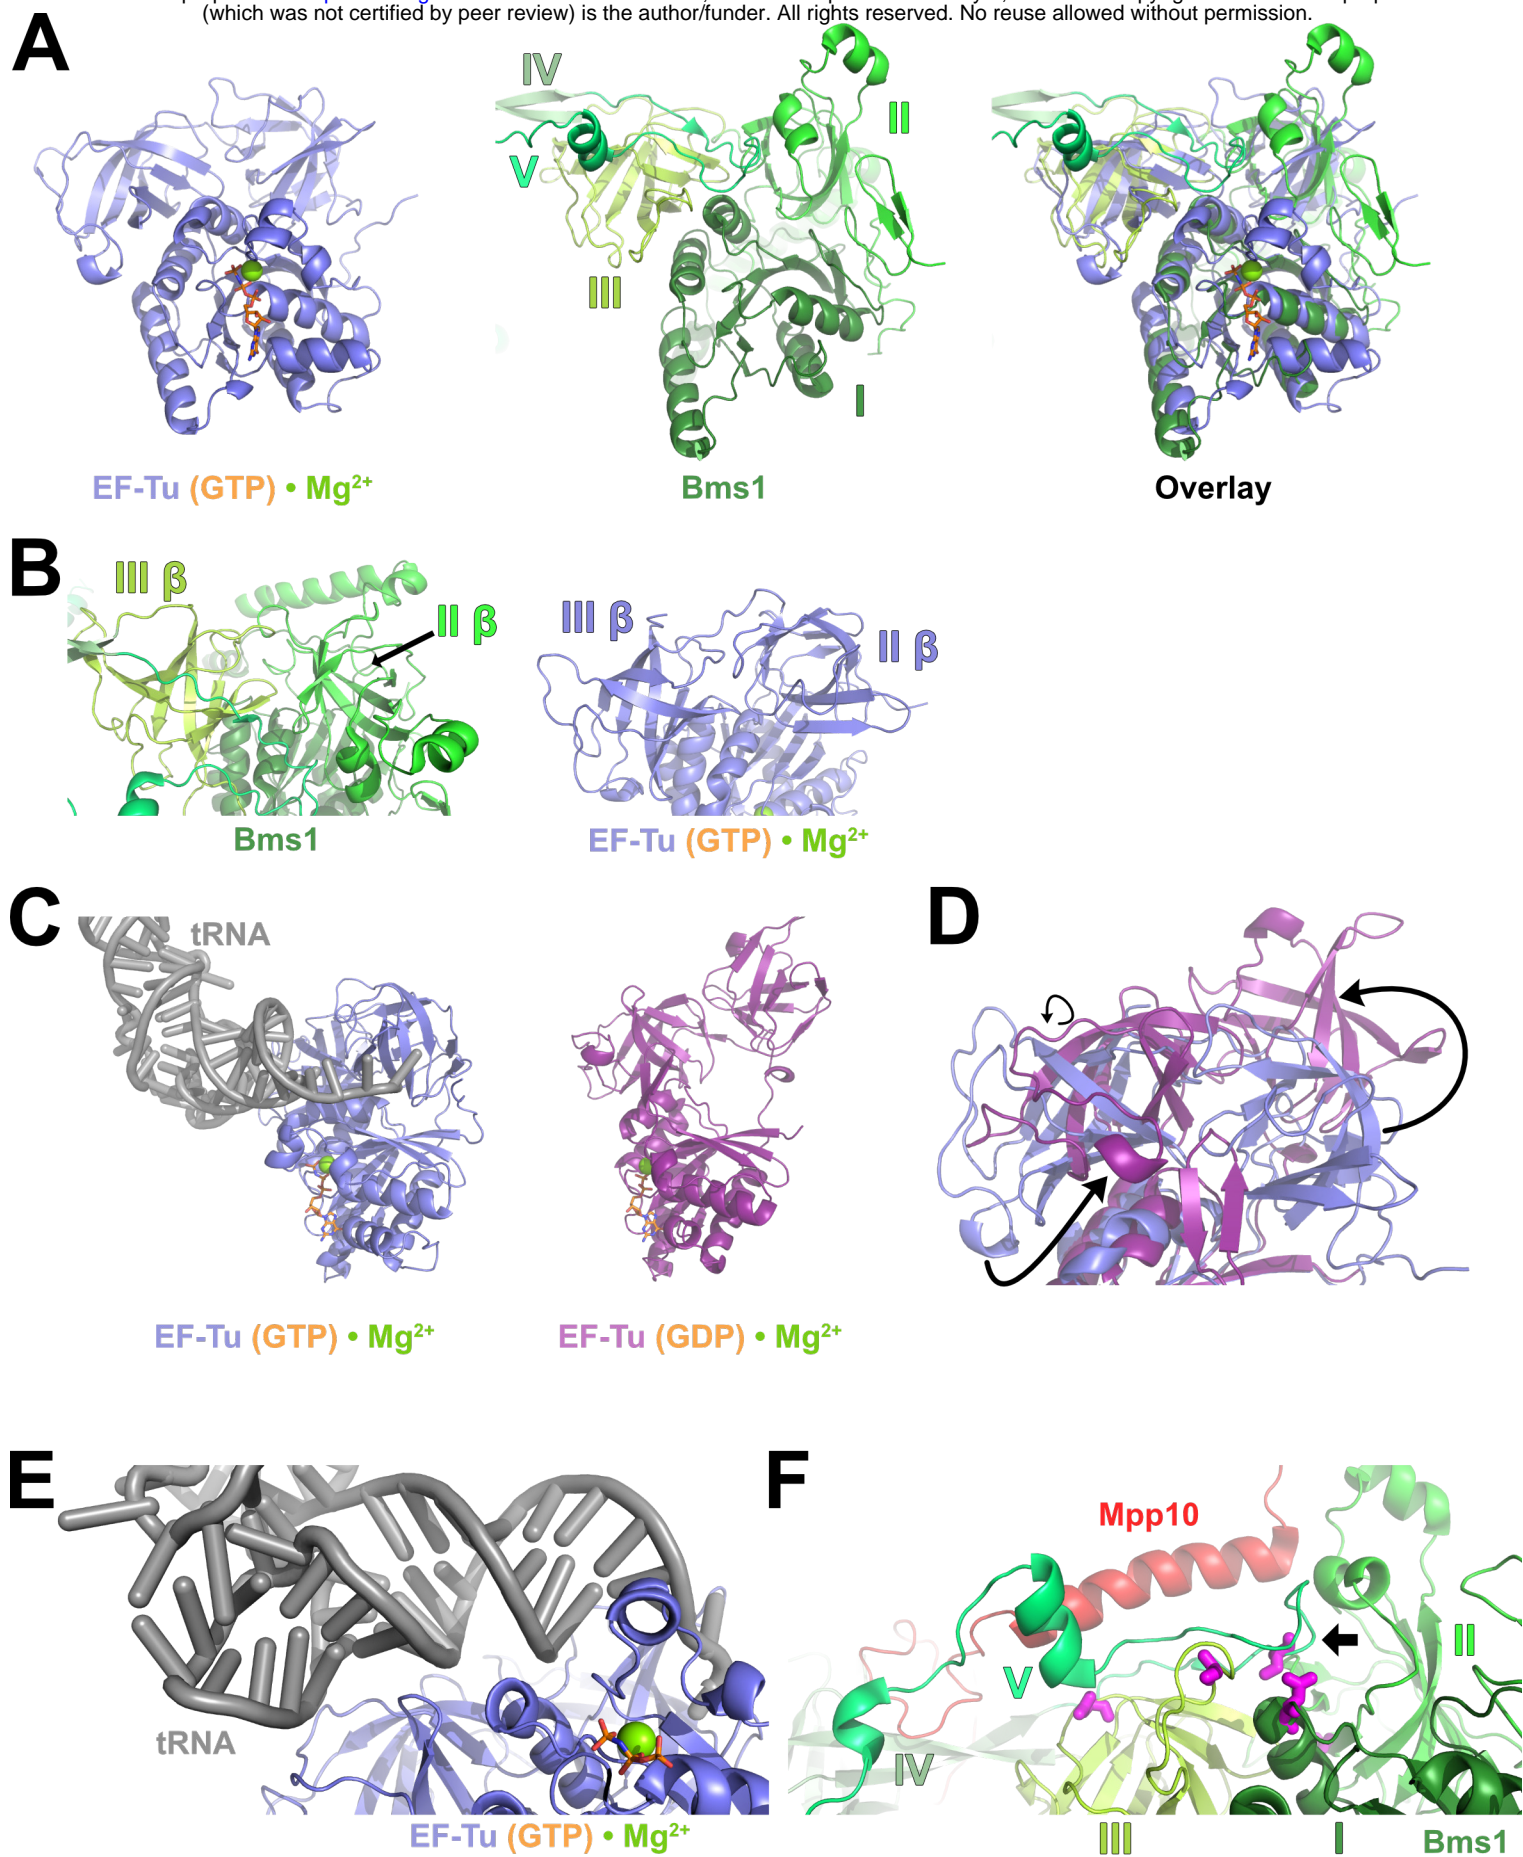

**Figure S4, Black, et al 2020**

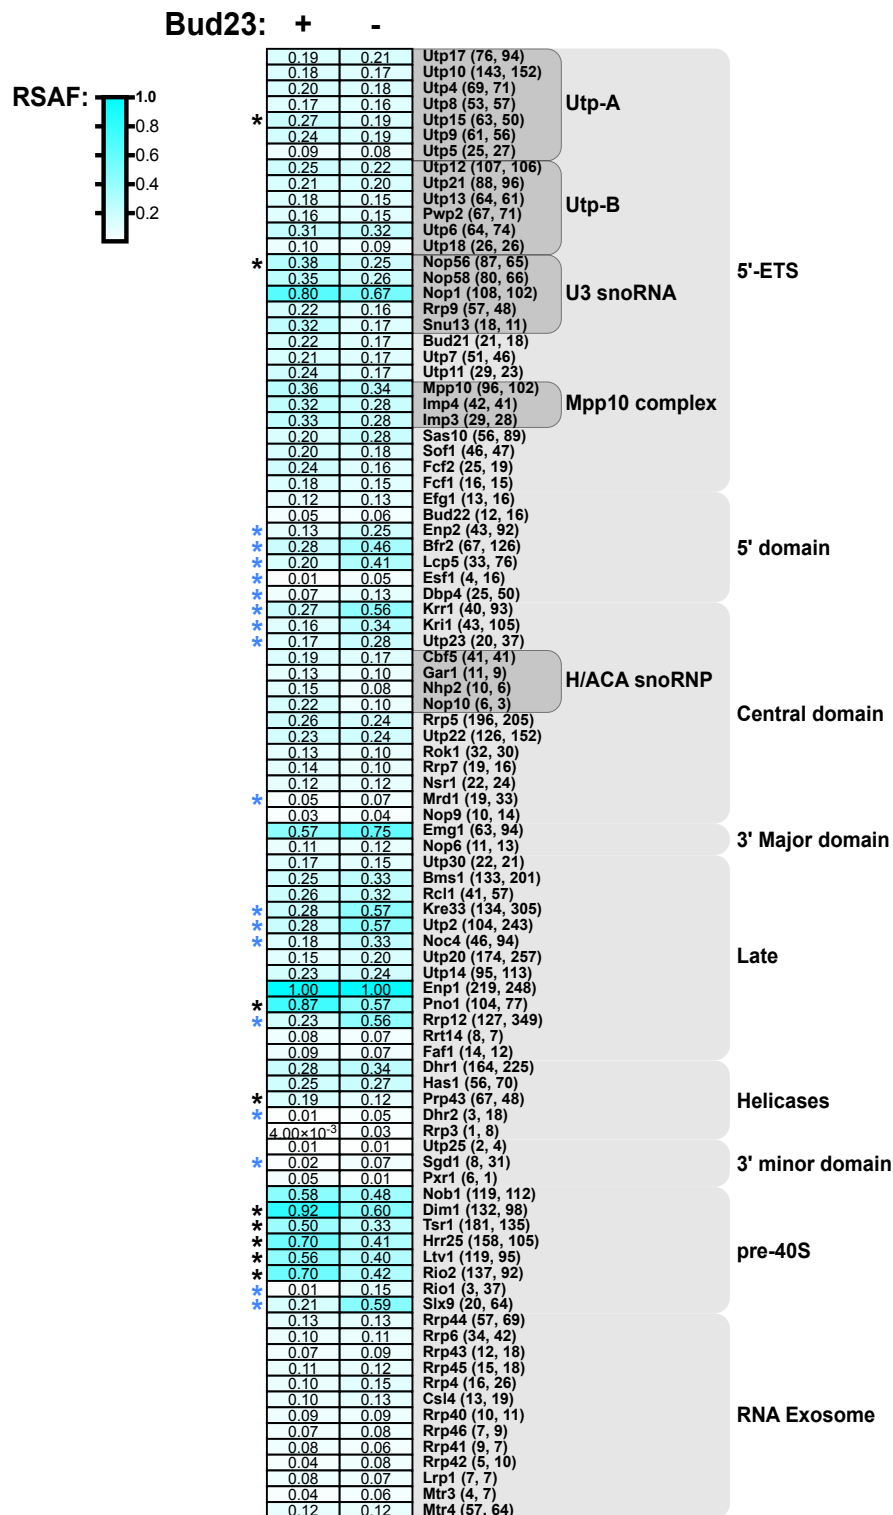

**Figure S5, Black, et al 2020**

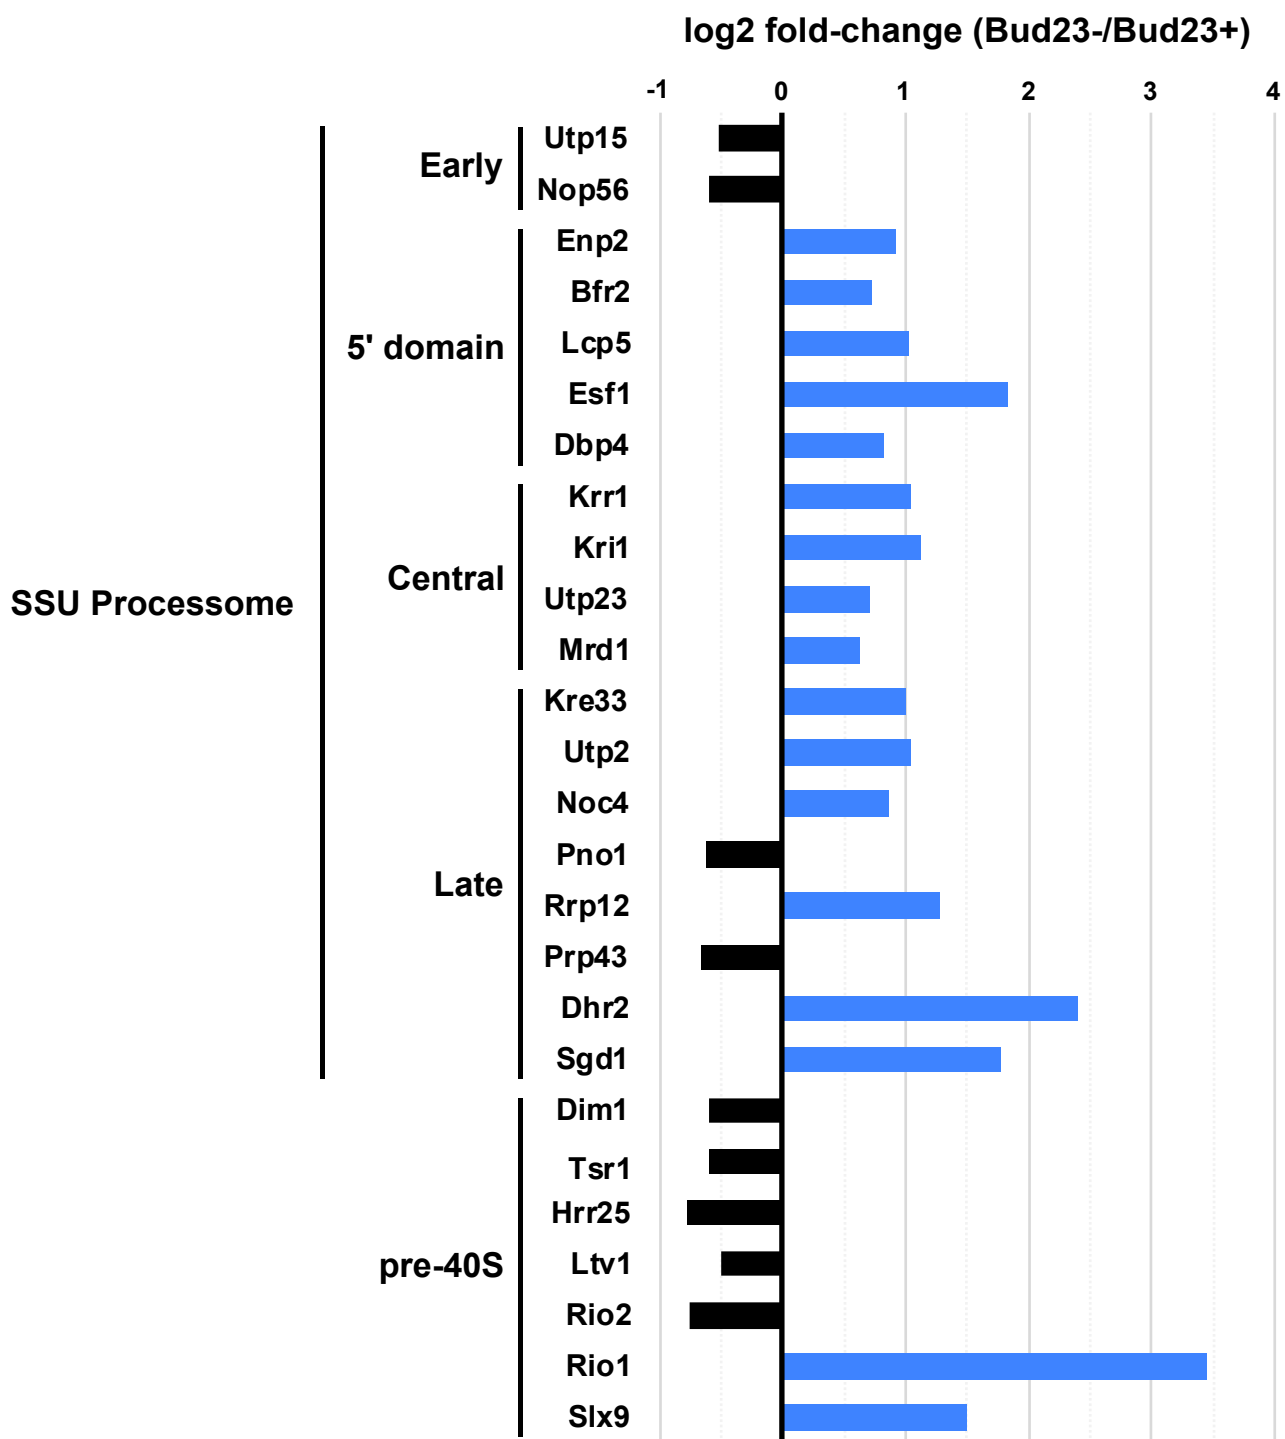

**Figure S6, Black, et al 2020**
